# Supplementary material for: Palladium-catalyzed Sonogashira coupling of amides: access to ynones via C–N bond cleavage
Source: Royal Society of Chemistry journal article supplement (doi:10.1039/c6cc06428k), 2016-01-01

## Electronic Supplementary Information (ESI)

### Palladium-Catalyzed Sonogashira Coupling of Amides: Access to Ynones via C-N Bond Cleavage

Ming Cui,<sup>a</sup> Hongxiang Wu,<sup>a</sup> Junsheng Jian,<sup>a</sup> Hui Wang,<sup>a</sup> Chao Liu,<sup>b</sup> Stelck, Daniel,<sup>c</sup> Zhuo Zeng<sup>\*ab</sup>

<sup>a</sup>College of Chemistry & Environment, South China Normal University, Guangzhou 510006, People's Republic of China

<sup>b</sup>Key Laboratory of Organofluorine Chemistry, Shanghai Institute of Organic Chemistry, Chinese Academy of Science, 345 LingLing Road, Shanghai 200032, China

<sup>c</sup>Department of Chemistry, University of Idaho, Moscow, ID 83844-2343, USA

\*E-mail: zhuoz@scnu.edu.cn

#### List of Contents

|                                                                                                      |       |
|------------------------------------------------------------------------------------------------------|-------|
| General experimental details and materials .....                                                     | 2     |
| Optimization of the reaction conditions Table 1 .....                                                | 3     |
| General procedure for N-acylsaccharin synthesis <b>1a-1p</b> .....                                   | 4-5   |
| General Procedures for the synthesis of products <b>3aa-3an, 3ba-3pa</b> .....                       | 5     |
| Evaluating different amides Scheme 2.....                                                            | 6     |
| Detail description of for starting materials and products.....                                       | 6-23  |
| References.....                                                                                      | 24    |
| Copies of <sup>1</sup> H NMR, <sup>13</sup> C NMR and <sup>19</sup> F NMR of Starting Materials..... | 25-47 |
| Copies of <sup>1</sup> H NMR, <sup>19</sup> F NMR of Products.....                                   | 48-79 |

### General experimental details and materials

The reactions were conducted in sealed tube under the protection of a nitrogen atmosphere. All reactants reported in the manuscript are commercially available and have been prepared by the method reported previously. *N*-Methoxy-*N*-Methylbenzamide **4b** was purchased at the China Suppliers. Other amides were prepared by standard methods.<sup>2-5</sup> *N*-Acylsaccharins were prepared by the general methods. All solvents were purchased at the China suppliers and used without any purification. Triethylamine was purified by distillation with calcium hydride. Flash chromatography was performed using 200-300 mesh silica gel. All ynone products are known compounds. <sup>1</sup>H and <sup>13</sup>C and <sup>19</sup>F NMR data were recorded with Bruker Advance III (500 MHz) and Varian (400 MHz) spectrometers in CDCl<sub>3</sub> with tetramethylsilane as an internal standard.

**Table 1 Optimisation of the reaction conditions<sup>a</sup>**

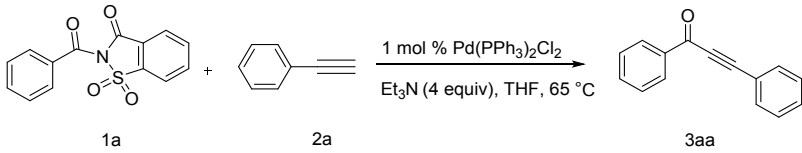

1a + 2a  $\xrightarrow[\text{Et}_3\text{N (4 equiv), THF, 65 } ^\circ\text{C}]{\text{1 mol \% Pd(PPh}_3)_2\text{Cl}_2}$  3aa

| Entry           | Catalyst                                           | Ligand           | Base                            | Solvent            | yield <sup>b</sup> (%) |
|-----------------|----------------------------------------------------|------------------|---------------------------------|--------------------|------------------------|
| 1               | Pd(PPh <sub>3</sub> ) <sub>2</sub> Cl <sub>2</sub> | ND               | K <sub>3</sub> PO <sub>4</sub>  | toluene            | 61                     |
| 2               | Pd(OAc) <sub>2</sub>                               | PPh <sub>3</sub> | K <sub>3</sub> PO <sub>4</sub>  | toluene            | 48                     |
| 3               | Pd(PPh <sub>3</sub> ) <sub>4</sub>                 | ND               | K <sub>3</sub> PO <sub>4</sub>  | toluene            | 45                     |
| 4               | Pd(OAc) <sub>2</sub>                               | ND               | K <sub>3</sub> PO <sub>4</sub>  | toluene            | ND                     |
| 5               | Pd(OAc) <sub>2</sub>                               | PCy <sub>3</sub> | K <sub>3</sub> PO <sub>4</sub>  | toluene            | ND                     |
| 6 <sup>c</sup>  | Pd(OAc) <sub>2</sub>                               | dppf             | K <sub>3</sub> PO <sub>4</sub>  | toluene            | ND                     |
| 7               | Pd(PPh <sub>3</sub> ) <sub>2</sub> Cl <sub>2</sub> | ND               | K <sub>3</sub> PO <sub>4</sub>  | THF                | 75                     |
| 8               | Pd(PPh <sub>3</sub> ) <sub>2</sub> Cl <sub>2</sub> | ND               | K <sub>3</sub> PO <sub>4</sub>  | CH <sub>3</sub> CN | 62                     |
| 9               | Pd(PPh <sub>3</sub> ) <sub>2</sub> Cl <sub>2</sub> | ND               | K <sub>3</sub> PO <sub>4</sub>  | dioxane            | 57                     |
| 10              | Pd(PPh <sub>3</sub> ) <sub>2</sub> Cl <sub>2</sub> | ND               | ND                              | THF                | ND                     |
| 11              | Pd(PPh <sub>3</sub> ) <sub>2</sub> Cl <sub>2</sub> | ND               | K <sub>2</sub> CO <sub>3</sub>  | THF                | trace                  |
| 12              | Pd(PPh <sub>3</sub> ) <sub>2</sub> Cl <sub>2</sub> | ND               | Cs <sub>2</sub> CO <sub>3</sub> | THF                | trace                  |
| 13              | Pd(PPh <sub>3</sub> ) <sub>2</sub> Cl <sub>2</sub> | ND               | Et <sub>3</sub> N               | THF                | 95                     |
| 14              | Pd(PPh <sub>3</sub> ) <sub>2</sub> Cl <sub>2</sub> | ND               | <i>i</i> -Pr <sub>2</sub> NEt   | THF                | 78                     |
| 15              | Pd(PPh <sub>3</sub> ) <sub>2</sub> Cl <sub>2</sub> | ND               | Pyridine                        | THF                | ND                     |
| 16              | Pd(PPh <sub>3</sub> ) <sub>2</sub> Cl <sub>2</sub> | ND               | DBU                             | THF                | ND                     |
| 17              | Pd(PPh <sub>3</sub> ) <sub>2</sub> Cl <sub>2</sub> | ND               | DABCO                           | THF                | ND                     |
| 18 <sup>d</sup> | Pd(PPh <sub>3</sub> ) <sub>2</sub> Cl <sub>2</sub> | ND               | Et <sub>3</sub> N               | THF                | 92                     |
| 19 <sup>e</sup> | Pd(PPh <sub>3</sub> )Cl <sub>2</sub>               | ND               | Et <sub>3</sub> N               | THF                | 42                     |

<sup>a</sup> DBU = 1,8-diazabicyclo[5.4.0]undec-7-ene. DABCO = triethylenediamine. dppf = 1,1'-Bis(disphenylphosphino)ferrocene. PCy<sub>3</sub> = tri(cyclohexyl)phosphine. Reaction conditions (unless otherwise noted): 1a (0.5 mmol), 2b (0.75 mmol), catalyst (5 mol %), base (4 equiv, 2 mmol), ligand (10 mol %), solvent (3 mL). The mixture stirred and heated at 65 °C for 24 h. <sup>b</sup>Isolated yield. <sup>c</sup>dppf (5 mol %). <sup>d</sup>catalyst (1 mol %). <sup>e</sup>catalyst (0.5 mol %).

## General procedure for N-acylsaccharin synthesis 1a-1p:

### General procedure A:

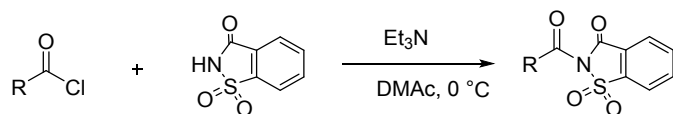

An oven-dried round-bottomed flask (25 mL) equipped with a stir bar was charged with Et<sub>3</sub>N (10 mmol, 1.0 equiv), DMAc (8 mL) and saccharin (10 mmol, 1.0 equiv) were slowly added into the mixture. Acyl chloride (1.0 equiv) was added dropwise to the reaction mixture with vigorous stirring at 0 °C, and the temperature was maintained at 0 °C for 1h. After the indicated time, the reaction mixture was poured into 80 mL of water and extracted with ethyl acetate (3 × 20 mL). The organic layer was combined and washed with brine (3 × 30 mL), dried, and concentrated. The obtained residue was purified by column chromatography using petroleum ether/ethyl acetate (3/1) as eluent afforded *N*-benzoylsaccharin (2.10 g, 73.1%).

### General procedure B:

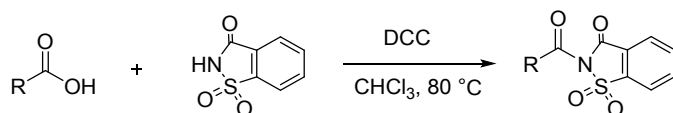

An oven-dried round-bottomed flask (100 mL) equipped with a stir bar was charged with CHCl<sub>3</sub> (50 mL), saccharin (10 mmol, 1.0 equiv), benzoic acid (1.0equiv). DCC (1.0 equiv) was added to the reaction mixture with vigorous stirring at 80°C, and the temperature was maintained at 80 °C for 12h. After cooling to room temperature, the mixture was filtrated through a short pad of silica gel, then the silica gel was washed with CHCl<sub>3</sub> (3 × 20 mL) and the organic phases were combined. After the solvent was removed, the crude product was purified by silica gel column chromatography using

petroleum ether/ethyl acetate (3/1) as eluent afforded *N*-benzoylsaccharin (1.46 g, 51.2%).

### General procedure C:

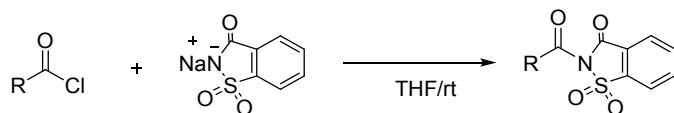

An oven-dried round-bottomed flask (100 mL) equipped with a stir bar was charged with THF (30 mL), saccharin sodium salt (10 mmol, 1.0 equiv), acetic chloride (1.0 equiv). The reaction mixture was vigorous stirring at room temperature for 24h. After the solvent was removed, the crude product was purified by silica gel column chromatography using petroleum ether/ethyl acetate (3/1) as eluent afforded *N*-acetylsaccharin (1.93 g, 85.7%).

### General Procedures for the synthesis of products 3aa-3an, 3ba-3pa:

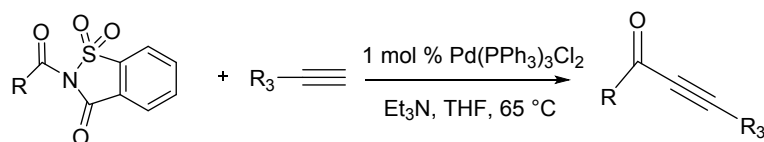

In an oven-dried Teflon septum screw-capped tube (15 mL), add *N*-acylsaccharin **1a-1p** (0.5 mmol), Pd(PPh<sub>3</sub>)<sub>2</sub>Cl<sub>2</sub> (3.5 mg, 0.005 mmol). The tube was then charged with nitrogen. Super dry tetrahydrofuran (3 mL) was injected into tube by syringe. Et<sub>3</sub>N (0.3 mL, 2 mmol) and the alkyne reagent **2a-2n** (0.75 mmol) was subsequently injected into the reaction tube. The reaction was monitored by TLC. The reaction was then heated to 65 °C and stirred for 24 h. After cooling to room temperature, the solvents were removed, the crude product was purified by silica gel column chromatography using petroleum ether/ethyl acetate as eluent.

## Evaluating different amides Scheme 2

According to the general procedure, different amide **4a-4f** (0.5 mmol) was reacted with  $\text{Pd}(\text{PPh}_3)_2\text{Cl}_2$  (3.5 mg, 0.005 mmol),  $\text{Et}_3\text{N}$  (0.3 mL, 2 mmol) and Phenylacetylene **2a** (0.75 mmol) in Super dry tetrahydrofuran (3 ml) for 24 h at 65 °C. The reaction was monitored by TLC. The reaction was completely unsuccessful. After cooling to room temperature, the solvents were removed, the crude product was purified by silica gel column chromatography using petroleum ether/ethyl acetate (40/1) as eluent. The none of ynone products were obtained under optimized condition.

## Detail description of for starting materials and products

### Characterization Data of *N*-Acylsaccharins

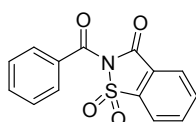

***N*-Benzoylsaccharin (1a).**<sup>1</sup> Following general procedure A, **1a** was isolated as a white solid (2.10 g, 73.1%). <sup>1</sup>H NMR (400 MHz,  $\text{CDCl}_3$ )  $\delta$  = 8.13 – 8.09 (m, 1H), 7.99 (dd,  $J$  = 4.7, 0.9, 2H), 7.93 – 7.87 (m, 1H), 7.79 – 7.70 (m, 2H), 7.66 – 7.61 (m, 1H), 7.52 – 7.46 (m, 2H).

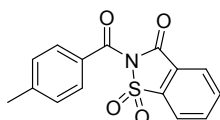

***N*-(4-methylbenzoyl)saccharin (1b).** Following general procedure A, **1b** was isolated as a white solid (2.14 g, 71.2%). <sup>1</sup>H NMR (400 MHz,  $\text{CDCl}_3$ )  $\delta$  = 8.14 – 8.11 (m, 1H), 8.01 – 7.96 (m, 2H), 7.90 (ddd,  $J$  = 7.8, 5.1, 3.4, 1H), 7.83 – 7.79 (m, 2H), 6.98 – 6.95 (m, 2H), 3.89 (s, 3H). <sup>13</sup>C NMR (100 MHz,  $\text{CDCl}_3$ )  $\delta$  = 166.39, 157.42, 138.38, 136.47, 134.94, 133.89, 132.33, 129.53, 128.42, 126.38, 125.43, 121.24, 21.56. HRMS (EI)  $m/z$ :  $[\text{M}]^+$  Calcd for  $\text{C}_{15}\text{H}_{11}\text{NO}_4\text{S}$  301.0409; Found 301.0417.

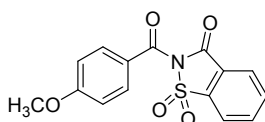

***N*-(4-methoxybenzoyl)saccharin (1c).** Following general procedure A, **1c** was isolated as a white solid (2.64 g, 83.3%). <sup>1</sup>H NMR (400 MHz, CDCl<sub>3</sub>) δ = 8.15 – 8.11 (m, 1H), 8.00 – 7.95 (m, 2H), 7.90 (ddd, *J* = 7.8, 5.1, 3.4, 1H), 7.84 – 7.79 (m, 2H), 6.99 – 6.95 (m, 2H), 3.89 (s, 3H). <sup>13</sup>C NMR (100 MHz, CDCl<sub>3</sub>) δ = 164.67, 157.92, 138.47, 136.24, 134.82, 132.74, 126.27, 125.79, 124.37, 121.19, 113.92, 109.99, 55.64. HRMS (EI) *m/z*: [M]<sup>+</sup> Calcd for C<sub>15</sub>H<sub>11</sub>NO<sub>5</sub>S 317.0358; Found 317.0361.

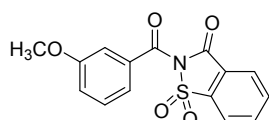

***N*-(3-methoxybenzoyl)saccharin (1d).** Following general procedure A, **1d** was isolated as a white solid (2.58 g, 81.4%). <sup>1</sup>H NMR (400 MHz, CDCl<sub>3</sub>) δ = 8.13 (d, *J* = 7.6, 1H), 8.05 – 7.99 (m, 2H), 7.94 – 7.90 (m, 1H), 7.40 (t, *J* = 7.9, 1H), 7.36 – 7.28 (m, 2H), 7.19 (dd, *J* = 8.1, 2.6, 1H), 3.86 (s, 3H). <sup>13</sup>C NMR (100 MHz, CDCl<sub>3</sub>) δ = 166.18, 159.49, 157.46, 138.41, 136.41, 134.90, 133.53, 129.47, 126.39, 121.93, 121.25, 121.09, 120.25, 114.22, 55.54. HRMS (EI) *m/z*: [M]<sup>+</sup> Calcd for C<sub>15</sub>H<sub>11</sub>NO<sub>5</sub>S 317.0358; Found 317.0363.

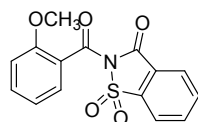

***N*-(2-methoxybenzoyl)saccharin (1e).** Following general procedure B, **1e** was isolated as a white solid (1.57 g, 49.6%). <sup>1</sup>H NMR (400 MHz, CDCl<sub>3</sub>) δ = 8.07 (d, *J* = 7.9, 1H), 8.03 – 7.94 (m, 2H), 7.91 – 7.87 (m, 1H), 7.60 – 7.47 (m, 2H), 7.08 (t, *J* = 7.5, 1H), 6.93 (d, *J* = 8.8, 1H), 3.71 (s, 3H). <sup>13</sup>C NMR (100 MHz, CDCl<sub>3</sub>) δ = 164.83, 157.19, 156.63, 138.45, 136.28, 134.78, 133.88, 130.04, 126.03, 125.51, 122.96, 121.27, 120.95, 111.09, 55.85. HRMS (EI) *m/z*: [M]<sup>+</sup> Calcd for C<sub>15</sub>H<sub>11</sub>NO<sub>5</sub>S 317.0358; Found 317.0360.

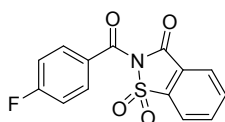

***N*-(4-fluorobenzoyl)saccharin (1f).** Following general procedure A, **1f** was

isolated as a white solid (2.25 g, 73.8%).  $^1\text{H}$  NMR (400 MHz,  $\text{CDCl}_3$ )  $\delta$  = 8.14 (d,  $J$  = 7.6, 1H), 8.03 – 7.98 (m, 2H), 7.95 – 7.91 (m, 1H), 7.81 (ddd,  $J$  = 8.0, 5.1, 2.5, 2H), 7.22 – 7.14 (m, 2H).  $^{13}\text{C}$  NMR (100 MHz,  $\text{CDCl}_3$ )  $\delta$  = 165.16, 157.52, 138.35(d,  $J^1$  = 258.2), 136.52, 135.02, 132.54 (d,  $J^3$  = 9.2, 2H), 128.51 (d,  $J^4$  = 2.1), 126.42, 125.40, 121.28, 115.95, 115.73(d,  $J^2$  = 23.2).  $^{19}\text{F}$  NMR (376 MHz,  $\text{CDCl}_3$ )  $\delta$  = -102.62. HRMS (EI)  $m/z$ :  $[\text{M}]^+$  Calcd for  $\text{C}_{14}\text{H}_8\text{FNO}_4\text{S}$  305.0158; Found 305.0160.

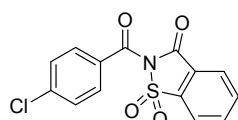

***N*-(4-chlorobenzoyl)saccharin (1g).** Following general procedure A, **1g** was isolated as a white solid (2.19 g, 68.3%).  $^1\text{H}$  NMR (400 MHz,  $\text{CDCl}_3$ )  $\delta$  = 8.13 (d,  $J$  = 7.6, 1H), 8.00 (t,  $J$  = 3.6, 2H), 7.95 – 7.90 (m, 1H), 7.73 – 7.68 (m, 2H), 7.50 – 7.45 (m, 2H).  $^{13}\text{C}$  NMR (100 MHz,  $\text{CDCl}_3$ )  $\delta$  = 165.39, 157.41, 140.51, 138.38, 136.54, 134.98, 130.98, 130.66, 128.85, 126.45, 125.34, 121.29. HRMS (EI)  $m/z$ :  $[\text{M}]^+$  Calcd for  $\text{C}_{14}\text{H}_8\text{ClNO}_4\text{S}$  321.0201; Found 321.0200.

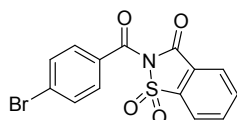

***N*-(4-bromobenzoyl)saccharin (1h).** Following general procedure A, **1h** was isolated as a white solid (2.65 g, 72.5%).  $^1\text{H}$  NMR (400 MHz,  $\text{CDCl}_3$ )  $\delta$  8.07 (dd,  $J$  = 7.6, 0.7 Hz, 1H), 7.95 (d,  $J$  = 3.8 Hz, 2H), 7.87 (dd,  $J$  = 8.1, 4.1 Hz, 1H), 7.60 – 7.54 (m, 4H).  $^{13}\text{C}$  NMR (101 MHz,  $\text{CDCl}_3$ )  $\delta$  165.61, 157.50, 136.53, 134.97, 131.82, 130.98, 126.46, 121.29, 77.31, 76.99, 76.68. HRMS (EI)  $m/z$ :  $[\text{M}]^+$  Calcd for  $\text{C}_{14}\text{H}_8\text{BrNO}_4\text{S}$  364.9357; Found 364.9362.

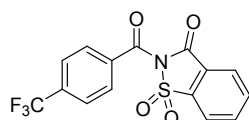

***N*-(4-(trifluoromethyl)benzoyl)saccharin (1i).** Following general procedure A, **1i** was isolated as a white solid (1.62 g, 45.6%).  $^1\text{H}$  NMR (400 MHz,  $\text{CDCl}_3$ )  $\delta$  = 8.13 (d,  $J$  = 7.6, 1H), 8.03 (d,  $J$  = 3.9, 2H), 7.95 (dd,  $J$  = 7.6, 4.3, 1H), 7.84 (d,  $J$  = 8.2, 2H),

7.76 (d,  $J = 8.2$ , 2H).  $^{13}\text{C}$  NMR (100 MHz,  $\text{CDCl}_3$ )  $\delta = 165.46$ , 157.19, 138.34(q,  $J^2 = 37.1$ ), 136.73, 135.63, 135.10(q,  $J^3 = 3.8$ ), 130.55, 129.55, 126.53, 125.46, 125.42, 125.10, 121.36(q,  $J^1 = 274.2$ ).  $^{19}\text{F}$  NMR (376 MHz,  $\text{CDCl}_3$ )  $\delta = -63.23$ . HRMS (EI)  $m/z$ :  $[\text{M}]^+$  Calcd for  $\text{C}_{15}\text{H}_8\text{F}_3\text{NO}_4\text{S}$  355.0126; Found 355.0121.

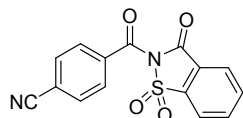

**N-(4-cyanobenzoyl)saccharin (1j).** Following general procedure A, **1j** was isolated as a white solid (1.68 g, 53.8%).  $^1\text{H}$  NMR (400 MHz,  $\text{CDCl}_3$ )  $\delta = 8.13$  (d,  $J = 7.6$ , 1H), 8.05 – 8.01 (m, 2H), 7.97 – 7.93 (m, 1H), 7.79 (d,  $J = 7.6$ , 4H).  $^{13}\text{C}$  NMR (100 MHz,  $\text{CDCl}_3$ )  $\delta = 165.06$ , 157.11, 138.34, 136.84, 136.19, 135.16, 132.13, 129.54, 126.58, 124.94, 121.40, 117.57, 116.77. HRMS (EI)  $m/z$ :  $[\text{M}]^+$  Calcd for  $\text{C}_{15}\text{H}_8\text{N}_2\text{O}_4\text{S}$  312.0205; Found 313.0212.

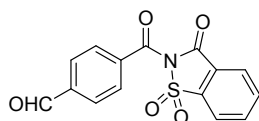

**N-(4-formylbenzoyl)saccharin (1k).** Following general procedure A, **1k** was isolated as a white solid (1.94 g, 61.5%).  $^1\text{H}$  NMR (400 MHz,  $\text{CDCl}_3$ )  $\delta = 10.12$  (s, 1H), 8.12 (d,  $J = 7.6$ , 1H), 8.04 – 7.99 (m, 4H), 7.94 (dt,  $J = 8.1$ , 4.2, 1H), 7.86 (d,  $J = 8.3$ , 2H).  $^{13}\text{C}$  NMR (100 MHz,  $\text{CDCl}_3$ )  $\delta = 191.18$ , 165.66, 157.16, 139.18, 138.39, 137.31, 136.72, 135.08, 129.64, 129.41, 126.54, 125.10, 121.36. HRMS (EI)  $m/z$ :  $[\text{M}]^+$  Calcd for  $\text{C}_{14}\text{H}_8\text{ClNO}_4\text{S}$  295.0409; Found 295.0309.

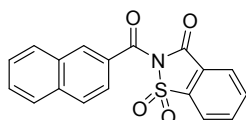

**N-(2-naphthoyl)saccharin (1l).** Following general procedure A, **1l** was isolated as a white solid (2.24 g, 66.5%).  $^1\text{H}$  NMR (400 MHz,  $\text{CDCl}_3$ )  $\delta = 8.36$  (s, 1H), 8.14 (d,  $J = 7.7$ , 1H), 8.01 (t,  $J = 7.5$ , 2H), 7.98 – 7.94 (m, 1H), 7.92 (t,  $J = 8.2$ , 3H), 7.77 (dd,  $J = 8.6$ , 1.8, 1H), 7.66 – 7.62 (m, 1H), 7.59 – 7.55 (m, 1H).  $^{13}\text{C}$  NMR (101 MHz,  $\text{cdcl}_3$ )  $\delta = 166.38$ , 157.59, 138.50, 136.39, 135.83, 134.89, 132.10, 131.88, 129.59, 129.57,

129.12, 128.30, 127.91, 127.13, 126.42, 125.60, 124.69, 121.26. HRMS (EI)  $m/z$ :  $[M]^+$  Calcd for  $C_{18}H_{11}NO_4S$  337.0740; Found 337.0743.

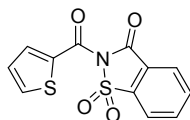

***N*-(thiophene-2-carbonyl)saccharin (1m).** Following general procedure A, **1m** was isolated as a white solid (2.03 g, 69.3%).  $^1H$  NMR (400 MHz,  $CDCl_3$ )  $\delta$  = 8.18 (dd,  $J$  = 9.4, 3.7, 1H), 8.01 – 7.90 (m, 4H), 7.84 (d,  $J$  = 5.0, 1H), 7.20 – 7.16 (m, 1H).  $^{13}C$  NMR (100 MHz,  $CDCl_3$ )  $\delta$  = 158.87, 158.03, 138.47, 137.20, 136.61, 135.79, 135.18, 128.43, 126.56, 125.88, 125.86, 121.48. HRMS (EI)  $m/z$ :  $[M]^+$  Calcd for  $C_{12}H_7NO_4S_2$  292.9817; Found 292.9808.

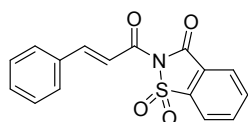

***N*-cinnamoylsaccharin (1n).** Following general procedure A, **1n** was isolated as a white solid (1.98 g, 63.3%).  $^1H$  NMR (400 MHz,  $CDCl_3$ )  $\delta$  = 8.19 (d,  $J$  = 7.6, 1H), 8.08 (d,  $J$  = 15.7, 1H), 8.01 – 7.96 (m, 2H), 7.95 – 7.90 (m, 1H), 7.72 (d,  $J$  = 15.6, 1H), 7.67 (dd,  $J$  = 7.5, 2.0, 2H), 7.47 – 7.41 (m, 3H).  $^{13}C$  NMR (100 MHz,  $CDCl_3$ )  $\delta$  = 163.26, 157.82, 149.68, 138.31, 136.42, 134.86, 134.01, 131.53, 129.05, 129.00, 126.27, 125.20, 121.20, 117.03. HRMS (EI)  $m/z$ :  $[M]^+$  Calcd for  $C_{16}H_{11}NO_4S$  313.0402; Found 313.0399.

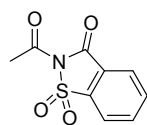

***N*-acetylsaccharin (1o).** Following general procedure C, **1o** was isolated as a white solid (1.93 g, 85.7%).  $^1H$  NMR (400 MHz,  $CDCl_3$ )  $\delta$  = 8.16 (d,  $J$  = 7.6, 1H), 8.01 – 7.95 (m, 2H), 7.92 (ddd,  $J$  = 7.8, 5.9, 2.7, 1H), 2.70 (s, 3H).  $^{13}C$  NMR (100 MHz,  $CDCl_3$ )  $\delta$  = 168.10, 157.61, 138.17, 136.50, 134.90, 126.28, 125.03, 121.24, 26.04. HRMS (EI)  $m/z$ :  $[M]^+$  Calcd for  $C_9H_7NO_4S$  225.0096; Found 225.0099.

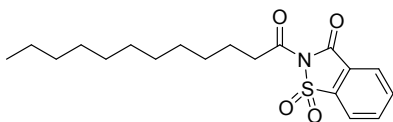

***N*-dodecanoylsaccharin (1p).** Following general procedure C, **1p** was isolated as a white solid (3.01 g, 82.3%). <sup>1</sup>H NMR (400 MHz, CDCl<sub>3</sub>) δ = 8.14 (d, *J* = 7.6, 1H), 8.00 – 7.94 (m, 2H), 7.90 (ddd, *J*=7.7, 5.9, 2.7, 1H), 3.02 (t, *J*=7.4, 2H), 1.74 (dd, *J* = 15.0, 7.5, 2H), 1.42 – 1.24 (m, 16H), 0.87 (t, *J* = 6.8, 3H). <sup>13</sup>C NMR (100 MHz, CDCl<sub>3</sub>) δ = 171.40, 157.59, 138.19, 136.41, 134.87, 126.21, 125.07, 121.19, 38.11, 33.84, 31.88, 29.58, 29.40, 29.30, 29.28, 28.88, 24.68, 23.49, 22.66, 14.10. HRMS (EI) *m/z*: [M]<sup>+</sup> Calcd for C<sub>19</sub>H<sub>27</sub>NO<sub>4</sub>S 365.1999; Found 365.1996.

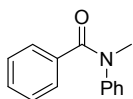

***N*-Methyl-*N*-phenylbenzamide (4a).** Following general procedure of literature, **4a** was purified by column chromatography (Petroleum ether/EtOAc = 3/1) to afford a white solid. <sup>1</sup>H NMR (400 MHz, CDCl<sub>3</sub>) δ 7.17 (dd, *J* = 5.2, 3.3 Hz, 2H), 7.05 – 6.99 (m, 3H), 6.99 – 6.91 (m, 3H), 6.89 – 6.84 (m, 2H), 3.32 (s, 3H). Spectral data match those previously reported<sup>2</sup>.

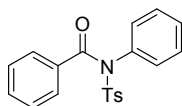

***N*-phenyl-*N*-tosyl benzamide (4c).** Following general procedure of literature, **4c** was purified by column chromatography (Petroleum ether/EtOAc = 2/1) to afford a white solid (3.05 g, 87%). <sup>1</sup>H NMR (400 MHz, CDCl<sub>3</sub>) δ = 7.89 – 7.78 (m, 2H), 7.47 – 7.39 (m, 2H), 7.34 – 7.24 (m, 6H), 7.19 – 7.12 (m, 4H), 2.44 (s, 3H). Spectral data match those previously reported<sup>3</sup>.

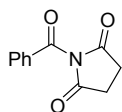

**1-Benzoylpyrrolidine-2,5-dione (4d).** Following general procedure of literature, **4d** was purified by column chromatography (Petroleum ether/EtOAc = 3/1) to

afford a white solid.  $^1\text{H}$  NMR (400 MHz,  $\text{CDCl}_3$ )  $\delta$  7.82 – 7.71 (m, 2H), 7.57 (t,  $J$  = 7.5 Hz, 1H), 7.40 (t,  $J$  = 7.8 Hz, 2H), 2.82 (s, 4H). Spectral data match those previously reported<sup>4</sup>.

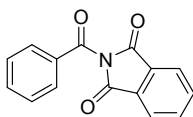

**2-Benzoylisoindoline-1,3-dione (4e).** Following general procedure of the literature, **4e** was purified by column chromatography (Petroleum ether/EtOAc = 3/1) to afford a white solid (2.10 g, 83.2%).  $^1\text{H}$  NMR (400 MHz,  $\text{CDCl}_3$ )  $\delta$  = 7.98 (dd,  $J$  = 4.6, 2.0, 1H), 7.89 – 7.84 (m, 4H), 7.76 (dd,  $J$  = 5.4, 3.2, 1H), 7.70 – 7.62 (m, 1H), 7.53 – 7.44 (m, 2H). Spectral data match those previously reported<sup>5</sup>.

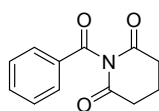

**1-Benzoylpiperidine-2,6-dione (4f).** Following general procedure of the literature, **4f** was purified by column chromatography (Petroleum ether/EtOAc = 3/1) to afford a white solid (2.18 g, 75.1%).  $^1\text{H}$  NMR (400 MHz,  $\text{CDCl}_3$ )  $\delta$  = 7.90 – 7.81 (m, 2H), 7.66 – 7.61 (m, 1H), 7.51 – 7.45 (m, 2H), 2.80 – 2.74 (m, 4H), 2.15 (ddd,  $J$  = 13.1, 6.5, 2.7, 2H). Spectral data match those previously reported<sup>4</sup>.

#### Detail descriptions for products

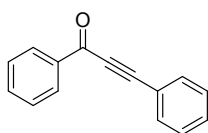

**1,3-Diphenylprop-2-yn-1-one (3aa):** In an oven-dried Teflon septum screw-capped tube (15 mL), N-benzoylsaccharin **1a** (0.5 mmol, 1.0 equiv) was reacted with phenylacetylene **2a** (0.75 mmol, 1.5 equiv) using standard procedures followed by silica gel column chromatography using petroleum ether/ethyl acetate (40/1) as eluent afforded the product **3aa** (94.9 mg, 92%) as a yellow oil.  $^1\text{H}$  NMR (500 MHz,  $\text{CDCl}_3$ )

$\delta$  8.18 – 8.14 (m, 2H), 7.63 – 7.60 (m, 2H), 7.58 – 7.54 (m, 1H), 7.47 – 7.43 (m, 2H), 7.43 – 7.39 (m, 1H), 7.35 (ddd,  $J$  = 6.7, 4.5, 1.2 Hz, 2H). Spectral data match those previously reported<sup>6</sup>.

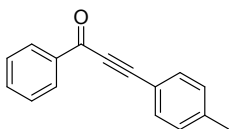

**1-Phenyl-3-(p-tolyl)prop-2-yn-1-one (3ab):** In an oven-dried Teflon septum screw-capped tube (15 mL), N-benzoylsaccharin **1a** (0.5 mmol, 1.0 equiv) was reacted with 4-ethynyltoluene **2b** (0.75 mmol, 1.5 equiv) using standard procedures followed by silica gel column chromatography using petroleum ether/ethyl acetate (40/1) as eluent afforded the product **3ab** (89.2 mg, 81%) as a pale yellow solid. <sup>1</sup>H NMR (400 MHz, CDCl<sub>3</sub>)  $\delta$  8.18 – 8.13 (m, 2H), 7.58 – 7.50 (m, 3H), 7.45 (dd,  $J$  = 10.6, 4.7 Hz, 2H), 7.16 (d,  $J$  = 8.0 Hz, 2H), 2.34 (s, 3H). Spectral data match those previously reported<sup>6</sup>.

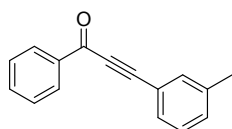

**1-Phenyl-3-(m-tolyl)prop-2-yn-1-one (3ac):** In an oven-dried Teflon septum screw-capped tube (15 mL), N-benzoylsaccharin **1a** (0.5 mmol, 1.0 equiv) was reacted with 3-ethynyltoluene **3c** (0.75 mmol, 1.5 equiv) using standard procedures followed by silica gel column chromatography using petroleum ether/ethyl acetate (40/1) as eluent afforded the product **3ac** (67.2 mg, 61%) as a pale yellow solid. <sup>1</sup>H NMR (400 MHz, CDCl<sub>3</sub>)  $\delta$  8.26 – 8.20 (m, 2H), 7.64 – 7.60 (m, 1H), 7.54 – 7.48 (m, 4H), 7.32 – 7.28 (m, 2H), 2.38 (s, 3H). Spectral data match those previously reported<sup>6</sup>.

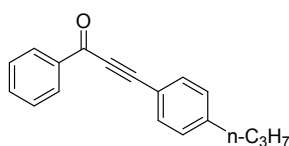

**1-phenyl-3-(4-propylphenyl)prop-2-yn-1-one (3ad):** In an oven-dried Teflon

septum screw-capped tube (15 mL), N-benzoylsaccharin **1a** (0.5 mmol, 1.0 equiv) was reacted with 1-ethynyl-4-propylbenzene **2d** (0.75 mmol, 1.5 equiv) using standard procedures followed by silica gel column chromatography using petroleum ether/ethyl acetate (20/1) as eluent afforded the product **3ad** (109.3 mg, 88%) as a pale yellow liquid.  $^1\text{H}$  NMR (400 MHz,  $\text{CDCl}_3$ )  $\delta$  8.22 (dt,  $J = 8.5, 1.6$  Hz, 2H), 7.63 – 7.58 (m, 3H), 7.53 – 7.49 (m, 2H), 7.23 (d,  $J = 8.2$  Hz, 2H), 2.65 – 2.60 (m, 2H), 1.68 – 1.63 (m, 2H), 0.95 (dd,  $J = 9.8, 4.9$  Hz, 3H). Spectral data match those previously reported<sup>7</sup>.

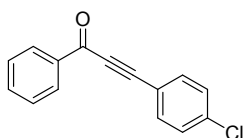

**1-Phenyl-3-(p-chlorophenyl)prop-2-yn-1-one (3ae):** In an oven-dried Teflon septum screw-capped tube (15mL), N-benzoylsaccharin **1a** (0.5 mmol, 1.0 equiv) was reacted with 1-chloro-4-ethynylbenzene **2e** (0.75 mmol, 1.5 equiv) using standard procedures followed by silica gel column chromatography using petroleum ether/ethyl acetate (40/1) as eluent afforded the product **3ae** (103.5 mg, 86%) as a pale yellow solid.  $^1\text{H}$  NMR (400 MHz,  $\text{CDCl}_3$ )  $\delta$  8.23 – 8.18 (m, 2H), 7.65 – 7.60 (m, 3H), 7.52 (t,  $J = 7.7$  Hz, 2H), 7.42 – 7.40 (m, 2H). Spectral data match those previously reported<sup>6</sup>.

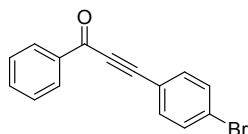

**1-Phenyl-3-(p-bromophenyl)prop-2-yn-1-one (3af):** In an oven-dried Teflon septum screw-capped tube (15mL), N-benzoylsaccharin **1a** (0.5 mmol, 1.0 equiv) was reacted with 1-bromo-4-ethynylbenzene **2f** (0.75 mmol, 1.5 equiv) using standard procedures followed by silica gel column chromatography using petroleum ether/ethyl acetate (40/1) as eluent afforded the product **3af** (112.6 mg, 79%) as a pale yellow solid pale.  $^1\text{H}$  NMR (400 MHz,  $\text{CDCl}_3$ )  $\delta$  8.24 – 8.18 (m, 2H), 7.65 (t,  $J = 7.4$  Hz, 1H), 7.59 – 7.52 (m, 6H). Spectral data match those previously reported<sup>6</sup>.

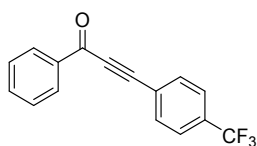

**1-Phenyl-3-(4-trifluoromethylphenyl)prop-2-yn-1-one (3ag):** In an oven-dried Teflon septum screw-capped tube (15mL), N-benzoylsaccharin **1a** (0.5 mmol, 1.0 equiv) was reacted with 1-ethynyl-4-(trifluoromethyl)benzene **2g** (0.75 mmol, 1.5equiv) using standard procedures followed by silica gel column chromatography using petroleum ether/ethyl acetate (40/1) as eluent afforded the product **3ag** (93.2 mg, 68%) as a pale yellow solid. <sup>1</sup>H NMR (500 MHz, CDCl<sub>3</sub>) δ 8.24 – 8.19 (m, 2H), 7.79 (d, *J* = 8.0 Hz, 2H), 7.70 – 7.65 (m, 3H), 7.54 (t, *J* = 7.7 Hz, 2H). <sup>19</sup>F NMR (471 MHz, CDCl<sub>3</sub>) δ -63.13. Spectral data match those previously reported<sup>6</sup>.

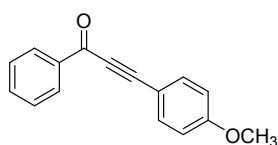

**1-Phenyl-3-(4-methoxyphenyl)prop-2-yn-1-one (3ah):** In an oven-dried Teflon septum screw-capped tube (15mL), N-benzoylsaccharin **1a** (0.5 mmol, 1.0 equiv) was reacted with 1-ethynyl-4-(trifluoromethyl)benzene **2h** (0.75 mmol, 1.5 equiv) using standard procedures followed by silica gel column chromatography using petroleum ether/ethyl acetate (20/1) as eluent afforded the product **3ah** (94.5 mg, 80%) as a pale yellow solid. <sup>1</sup>H NMR (400 MHz, CDCl<sub>3</sub>) δ 8.22 (dd, *J* = 8.2, 1.1 Hz, 2H), 7.68 – 7.61 (m, 3H), 7.52 (t, *J* = 7.6 Hz, 2H), 6.96 – 6.92 (m, 2H), 3.87 (s, 3H). Spectral data match those previously reported<sup>6</sup>.

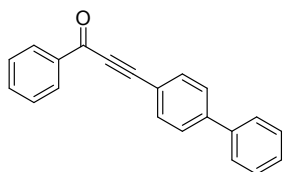

**1-Phenyl-3-(4-diphenyl)prop-2-yn-1-one (3ai):** In an oven-dried Teflon septum screw-capped tube (15mL), N-benzoylsaccharin **1a** (0.5 mmol, 1.0 equiv) was reacted

with 4-ethynyl-1,1'-biphenyl **2i** (0.75 mmol, 1.5 equiv) using standard procedures followed by silica gel column chromatography using petroleum ether/ethyl acetate (40/1) as eluent afforded the product **3ai** (120.0 mg, 85%) as a pale yellow solid. <sup>1</sup>H NMR (400 MHz, CDCl<sub>3</sub>) δ 8.29 – 8.19 (m, 2H), 7.77 – 7.74 (m, 2H), 7.67 – 7.60 (m, 6H), 7.52 (t, *J* = 7.6 Hz, 2H), 7.47 (dd, *J* = 10.1, 4.8 Hz, 2H), 7.41 – 7.37 (m, 1H). Spectral data match those previously reported<sup>8</sup>.

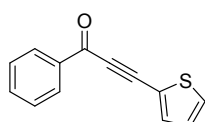

**1-Phenyl-3-(thiophen-2-yl)prop-2-yn-1-one (3aj):** In an oven-dried Teflon septum screw-capped tube (15mL), N-benzoylsaccharin **1a** (0.5 mmol, 1.0 equiv) was reacted with 2-ethynylthiophene **2j** (0.75 mmol, 1.5 equiv) using standard procedures followed by silica gel column chromatography using petroleum ether/ethyl acetate (20/1) as eluent afforded the product **3aj** (73.2 mg, 69%) as a pale yellow solid. <sup>1</sup>H NMR (400 MHz, CDCl<sub>3</sub>) δ 8.21 – 8.16 (m, 2H), 7.62 (d, *J* = 7.3 Hz, 1H), 7.59 (d, *J* = 3.7 Hz, 1H), 7.53 (dd, *J* = 10.6, 4.4 Hz, 3H), 7.11 (dd, *J* = 5.1, 3.8 Hz, 1H). Spectral data match those previously reported<sup>6</sup>.

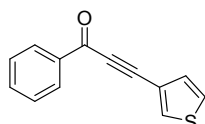

**1-Phenyl-3-(thiophen-3-yl)prop-2-yn-1-one (3ak):** In an oven-dried Teflon septum screw-capped tube (15mL), N-benzoylsaccharin **1a** (0.5 mmol, 1.0 equiv) was reacted with 3-ethynylthiophene **2k** (0.75 mmol, 1.5 equiv) using standard procedures followed by silica gel column chromatography using petroleum ether/ethyl acetate (20/1) as eluent afforded the product **3ak** (94.5 mg, 89%) as a brown liquid. <sup>1</sup>H NMR (400 MHz, CDCl<sub>3</sub>) δ 8.21 (dd, *J* = 5.3, 3.2 Hz, 2H), 7.86 (dd, *J* = 2.9, 1.0 Hz, 1H), 7.66 – 7.61 (m, 1H), 7.52 (dd, *J* = 10.3, 5.0 Hz, 2H), 7.39 (dd, *J* = 5.0, 2.9 Hz, 1H), 7.35 – 7.32 (m, 1H). Spectral data match those previously reported<sup>9</sup>.

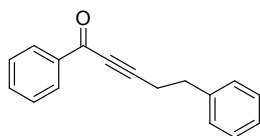

**1,5-Diphenylpent-2-yn-1-one (3al):** In an oven-dried Teflon septum screw-capped tube (15mL), N-benzoylsaccharin **1a** (0.5 mmol, 1.0 equiv) was reacted with but-3-yn-1-ylbenzene **2l** (0.75 mmol, 1.5 equiv) using standard procedures followed by silica gel column chromatography using petroleum ether/ethyl acetate (20/1) as eluent afforded the product **3al** (94.9 mg, 81%) as a pale yellow liquid.  $^1\text{H}$  NMR (500 MHz,  $\text{CDCl}_3$ )  $\delta$  7.99 (d,  $J = 7.4$  Hz, 2H), 7.58 (t,  $J = 7.4$  Hz, 1H), 7.42 (t,  $J = 7.8$  Hz, 2H), 7.36 – 7.32 (m, 2H), 7.27 (d,  $J = 7.9$  Hz, 2H), 2.99 (t,  $J = 7.3$  Hz, 2H), 2.82 (t,  $J = 7.3$  Hz, 2H). Spectral data match those previously reported<sup>10</sup>.

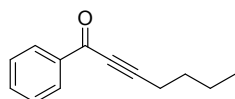

**1-Phenyl-3-hept-2-yn-1-one (3am):** In an oven-dried Teflon septum screw-capped tube (15mL), N-benzoylsaccharin **1a** (0.5 mmol, 1.0 equiv) was reacted with hex-1-yne **2m** (0.75 mmol, 1.5 equiv) using standard procedures followed by silica gel column chromatography using petroleum ether/ethyl acetate (40/1) as eluent afforded the product **3am** (54.0 mg, 58%) as a yellow liquid.  $^1\text{H}$  NMR (400 MHz,  $\text{CDCl}_3$ )  $\delta$  8.14 (d,  $J = 7.7$  Hz, 2H), 7.59 (t,  $J = 7.3$  Hz, 1H), 7.47 (t,  $J = 7.6$  Hz, 2H), 2.50 (t,  $J = 7.1$  Hz, 2H), 1.69 – 1.63 (m, 2H), 1.50 (dd,  $J = 14.9, 7.4$  Hz, 2H), 0.96 (t,  $J = 7.3$  Hz, 3H). Spectral data match those previously reported<sup>11</sup>.

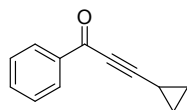

**3-Cyclopropyl-1-phenylprop-2-yn-1-one (3an):** In an oven-dried Teflon septum screw-capped tube (15mL), N-benzoylsaccharin **1a** (0.5 mmol, 1.0 equiv) was reacted with ethynylcyclopropane **2n** (0.75 mmol, 1.5 equiv) using standard procedures followed by silica gel column chromatography using petroleum ether/ethyl acetate (40/1) as eluent afforded the product **3an** (54.0 mg, 58%) as a colorless liquid.  $^1\text{H}$

NMR (500 MHz, CDCl<sub>3</sub>)  $\delta$  8.13 – 8.07 (m, 2H), 7.58 (t,  $J$  = 7.4 Hz, 1H), 7.46 (t,  $J$  = 7.7 Hz, 2H), 1.54 (tt,  $J$  = 7.8, 5.3 Hz, 1H), 1.06 – 1.00 (m, 4H). Spectral data match those previously reported<sup>6</sup>.

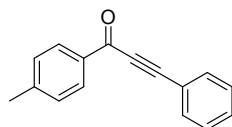

**1-(4-p-tolyl)-3-phenylprop-2-yn-1-one (3ba):**<sup>8</sup> In an oven-dried Teflon septum screw-capped tube (15mL), N-4-methylbenzoyl saccharin **1b** (0.5 mmol, 1.0 equiv) was reacted with phenylacetylene (0.75 mmol, 1.5 equiv) using standard procedures followed by silica gel column chromatography using petroleum ether/ethyl acetate (40/1) as eluent afforded the product **3ah** (72.7 mg, 66%) as a yellow oil. <sup>1</sup>H NMR (500 MHz, CDCl<sub>3</sub>)  $\delta$  8.11 (d,  $J$  = 8.1 Hz, 2H), 7.68 – 7.65 (m, 2H), 7.46 (t,  $J$  = 7.4 Hz, 1H), 7.40 (t,  $J$  = 7.4 Hz, 2H), 7.29 (d,  $J$  = 8.0 Hz, 2H), 2.43 (s, 3H). Spectral data match those previously reported<sup>12</sup>.

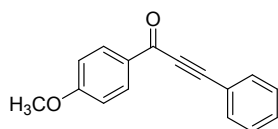

**1-(4-methoxy)-3-phenylprop-2-yn-1-one (3ca):**<sup>2</sup> In an oven-dried Teflon septum screw-capped tube (15mL), N-4-methoxybenzoyl saccharin **1c** (0.5 mmol, 1.0 equiv) was reacted with phenylacetylene (0.75 mmol, 1.5 equiv) using standard procedures followed by silica gel column chromatography using petroleum ether/ethyl acetate (20/1) as eluent afforded the product **3ca** (81.5 mg, 69%) as a pale yellow solid. <sup>1</sup>H NMR (500 MHz, CDCl<sub>3</sub>)  $\delta$  8.25 – 8.14 (m, 2H), 7.71 – 7.65 (m, 2H), 7.49 – 7.45 (m, 1H), 7.42 (t,  $J$  = 7.4 Hz, 2H), 6.99 (d,  $J$  = 8.9 Hz, 2H), 3.90 (s, 3H). Spectral data match those previously reported<sup>6</sup>.

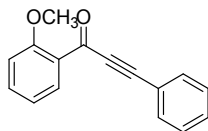

**1-(2-Methoxyphenyl)-3-(p-tolyl)prop-2-yn-1-one(3da):**<sup>2</sup> In an oven-dried Teflon septum screw-capped tube (15mL), N-2-methoxybenzoyl saccharin **1d** (0.5mmol, 1.0 equiv) was reacted with phenylacetylene (0.75 mmol, 1.5 equiv) using standard procedures followed by silica gel column chromatography using petroleum ether/ethyl acetate (20/1) as eluent afforded the product **3da** (57.9 mg, 49%) as a pale yellow solid. <sup>1</sup>H NMR (500 MHz, CDCl<sub>3</sub>) δ 7.56 (dd, *J* = 7.8, 1.6 Hz, 2H), 7.51 – 7.48 (m, 1H), 7.33 – 7.29 (m, 4H), 6.93 (dd, *J* = 10.9, 4.1 Hz, 1H), 6.89 (d, *J* = 8.4 Hz, 1H), 3.90 (s, 3H). Spectral data match those previously reported<sup>6</sup>.

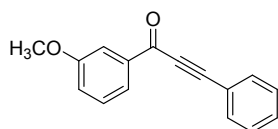

**1-(3-methoxyphenyl)-3-phenylprop-2-yn-1-one (3ea):** In an oven-dried Teflon septum screw-capped tube (15 mL), N-3-methoxybenzoyl saccharin **1e** (0.5 mmol, 1.0 equiv) was reacted with phenylacetylene (0.75 mmol, 1.5 equiv) using standard procedures followed by silica gel column chromatography using petroleum ether/ethyl acetate (20/1) as eluent afforded the product **3da** (73.2 mg, 62%) as a pale yellow solid. <sup>1</sup>H NMR (500 MHz, CDCl<sub>3</sub>) δ 7.88 – 7.85 (m, 1H), 7.71 – 7.67 (m, 3H), 7.48 (t, *J* = 7.5 Hz, 1H), 7.42 (dd, *J* = 7.7, 2.4 Hz, 3H), 7.19 – 7.16 (m, 1H), 3.88 (s, 3H). Spectral data match those previously reported<sup>13</sup>.

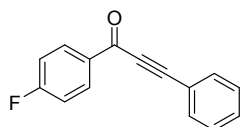

**1-(4-fluorophenyl)-3-phenylprop-2-yn-1-one (3fa):** In an oven-dried Teflon septum screw-capped tube (15 mL), N-4-fluorobenzoylsaccharin **1f** (0.5 mmol, 1.0 equiv) was reacted with phenylacetylene (0.75 mmol, 1.5 equiv) using standard procedures followed by silica gel column chromatography using petroleum ether/ethyl acetate

(40/1) as eluent afforded the product **3ca** (76.2 mg, 68%) as a pale yellow solid pale yellow solid.  $^1\text{H}$  NMR (400 MHz,  $\text{CDCl}_3$ )  $\delta$  8.32 – 8.20 (m, 2H), 7.72 – 7.68 (m, 2H), 7.51 (ddd,  $J$  = 6.2, 3.6, 1.1 Hz, 1H), 7.47 – 7.42 (m, 2H), 7.23 – 7.18 (m, 2H).  $^{19}\text{F}$  NMR (376 MHz,  $\text{cdcl}_3$ )  $\delta$  -102.98, -102.99, -103.00, -103.02, -103.02. Spectral data match those previously reported<sup>6</sup>.

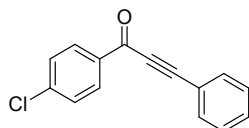

**1-(4-Chlorophenyl)-3-(p-tolyl)prop-2-yn-1-one (3ga):** In an oven-dried Teflon septum screw-capped tube (15 mL), N-4-chlorobenzoylsaccharin **1g** (0.5 mmol, 1.0 equiv) was reacted with phenylacetylene (0.75 mmol, 1.5 equiv) using standard procedures followed by silica gel column chromatography using petroleum ether/ethyl acetate (40/1) as eluent afforded the product **3ga** (103.5 mg, 86%) as a pale yellow solid.  $^1\text{H}$  NMR (400 MHz,  $\text{CDCl}_3$ )  $\delta$  8.32 – 8.20 (m, 2H), 7.72 – 7.68 (m, 2H), 7.51 (ddd,  $J$  = 6.2, 3.6, 1.1 Hz, 1H), 7.47 – 7.42 (m, 2H), 7.23 – 7.18 (m, 2H). Spectral data match those previously reported<sup>6</sup>.

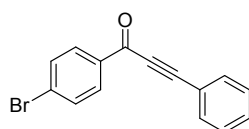

**1-(4-bromophenyl)-3-phenylprop-2-yn-1-one (3ha):** In an oven-dried Teflon septum screw-capped tube (15mL), 4-bromobenzoylsaccharin **1h** (0.5 mmol, 1.0 equiv) was reacted with phenylacetylene (0.75 mmol, 1.5 equiv) using standard procedures followed by silica gel column chromatography using petroleum ether/ethyl acetate (40/1) as eluent afforded the product **3ha** (87.0mg, 61%) as a pale yellow solid.  $^1\text{H}$  NMR (400 MHz,  $\text{CDCl}_3$ )  $\delta$  8.08 (d,  $J$  = 7.8 Hz, 2H), 7.67 (t,  $J$  = 7.5 Hz, 4H), 7.49 (d,  $J$  = 7.6 Hz, 1H), 7.43 (t,  $J$  = 7.7 Hz, 2H). Spectral data match those previously reported<sup>6</sup>.

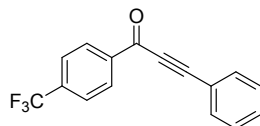

**3-phenyl-1-(4-(trifluoromethyl)phenyl)prop-2-yn-1-one (3ia):** In an oven-dried Teflon septum screw-capped tube (15 mL), N-4-(trifluoromethyl)benzoyl saccharin **1i** (0.5 mmol, 1.0 equiv) was reacted with phenylacetylene (0.75 mmol, 1.5 equiv) using standard procedures followed by silica gel column chromatography using petroleum ether/ethyl acetate (40/1) as eluent afforded the product **3ia** (87.8 mg, 64%) as a pale yellow solid.  $^1\text{H}$  NMR (500 MHz,  $\text{CDCl}_3$ )  $\delta$  8.32 (d,  $J$  = 8.0 Hz, 2H), 7.78 (d,  $J$  = 8.1 Hz, 2H), 7.69 (d,  $J$  = 7.9 Hz, 2H), 7.51 (t,  $J$  = 7.4 Hz, 1H), 7.44 (t,  $J$  = 7.6 Hz, 2H).  $^{19}\text{F}$  NMR (471 MHz,  $\text{CDCl}_3$ )  $\delta$  -63.11. Spectral data match those previously reported<sup>6</sup>.

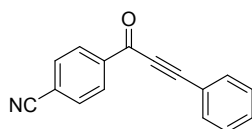

**1-(4-cyanophenyl)-3-phenylprop-2-yn-1-one (3ja):** In an oven-dried Teflon septum screw-capped tube (15mL), N-4-cyanobenzoylsaccharin **1j** (0.5 mmol, 1.0 equiv) was reacted with phenylacetylene (0.75 mmol, 1.5 equiv) using standard procedures followed by silica gel column chromatography using petroleum ether/ethyl acetate (40/1) as eluent afforded the product **3ja** (72.8 mg, 63%) as a pale yellow solid.  $^1\text{H}$  NMR (400 MHz,  $\text{CDCl}_3$ )  $\delta$  8.35 – 8.31 (m, 2H), 7.87 – 7.82 (m, 2H), 7.75 – 7.70 (m, 2H), 7.55 (ddd,  $J$  = 7.5, 3.9, 1.3 Hz, 1H), 7.50 – 7.45 (m, 2H). Spectral data match those previously reported<sup>14</sup>.

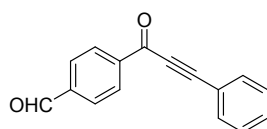

**1-(4-formalphenyl)-3-phenylprop-2-yn-1-one (3ka):** In an oven-dried Teflon septum screw-capped tube (15 mL), N-4-formylbenzoylsaccharin **1k** (0.5 mmol, 1.0 equiv) was reacted with phenylacetylene (0.75 mmol, 1.5 equiv) using standard procedures followed by silica gel column chromatography using petroleum ether/ethyl

acetate (10/1) as eluent afforded the product **3ka** (59.7 mg, 51%) as a pale yellow solid.  $^1\text{H}$  NMR (500 MHz,  $\text{CDCl}_3$ )  $\delta$  10.15 (s, 1H), 8.37 (d,  $J$  = 8.2 Hz, 2H), 8.03 (d,  $J$  = 8.2 Hz, 2H), 7.71 (d,  $J$  = 7.2 Hz, 2H), 7.52 (t,  $J$  = 7.5 Hz, 1H), 7.45 (t,  $J$  = 7.5 Hz, 2H). Spectral data match those previously reported<sup>15</sup>.

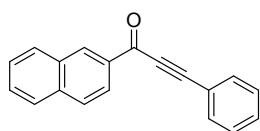

**1-(Naphthalen-2-yl)-3-phenylprop-2-yn-1-one (3la):** In an oven-dried Teflon septum screw-capped tube (15 mL), N-2-naphthoylsaccharin **1l** (0.5 mmol, 1.0 equiv) was reacted with phenylacetylene (0.75 mmol, 1.5 equiv) using standard procedures followed by silica gel column chromatography using petroleum ether/ethyl acetate (40/1) as eluent afforded the product **3la** (97.7 mg, 76%) as a pale yellow solid.  $^1\text{H}$  NMR (500 MHz,  $\text{CDCl}_3$ )  $\delta$  8.75 (s, 1H), 8.19 (dd,  $J$  = 8.6, 1.6 Hz, 1H), 7.99 (d,  $J$  = 8.1 Hz, 1H), 7.87 (dd,  $J$  = 12.0, 8.4 Hz, 2H), 7.73 – 7.69 (m, 2H), 7.62 – 7.58 (m, 1H), 7.55 (dd,  $J$  = 11.0, 3.9 Hz, 1H), 7.49 – 7.45 (m, 1H), 7.42 (t,  $J$  = 7.3 Hz, 2H). Spectral data match those previously reported<sup>6</sup>.

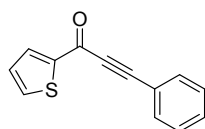

**1-(Thiophen-2-yl)-3-(p-tolyl)prop-2-yn-1-one (3ma):** In an oven-dried Teflon septum screw-capped tube (15mL), N-thiophene-2-carbonyl saccharin **1m** (0.5 mmol, 1.0 equiv) was reacted with phenylacetylene (0.75 mmol, 1.5 equiv) using standard procedures followed by silica gel column chromatography using petroleum ether/ethyl acetate (40/1) as eluent afforded the product **3ma** (65.8 mg, 62%) as a pale yellow solid.  $^1\text{H}$  NMR (500 MHz,  $\text{CDCl}_3$ )  $\delta$  7.93 (dd,  $J$  = 3.8, 1.0 Hz, 1H), 7.64 (dd,  $J$  = 4.9, 1.0 Hz, 1H), 7.59 – 7.56 (m, 2H), 7.40 (t,  $J$  = 7.5 Hz, 1H), 7.33 (t,  $J$  = 7.5 Hz, 2H), 7.10 (dd,  $J$  = 4.7, 4.0 Hz, 1H). Spectral data match those previously reported<sup>6</sup>.

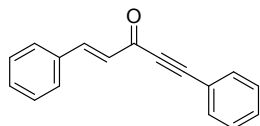

**1-pentene-5-phenyl-4-yne-3-one (3na):** In an oven-dried Teflon septum screw-capped tube (15 mL), N-cinnamoylsaccharin **1n** (0.5 mmol, 1.0 equiv) was reacted with phenylacetylene (0.75 mmol, 1.5 equiv) using standard procedures followed by silica gel column chromatography using petroleum ether/ethyl acetate (40/1) as eluent afforded the product **3na** (113.8 mg, 98%) as a pale yellow solid.  $^1\text{H}$  NMR (500 MHz,  $\text{CDCl}_3$ )  $\delta$  7.90 (d,  $J = 16.1$  Hz, 1H), 7.66 – 7.61 (m, 2H), 7.58 (dd,  $J = 6.6, 2.8$  Hz, 2H), 7.46 (dd,  $J = 8.6, 6.2$  Hz, 1H), 7.43 – 7.38 (m, 5H), 6.85 (d,  $J = 16.1$  Hz, 1H). Spectral data match those previously reported<sup>16</sup>.

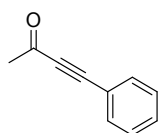

**1-methyl-3-phenylprop-2-yne-1-one (3oa):** In an oven-dried Teflon septum screw-capped tube (15 mL), N-acetylsaccharin **1o** (0.5 mmol, 1.0 equiv) was reacted with phenylacetylene (0.75 mmol, 1.5 equiv) using standard procedures followed by silica gel column chromatography using petroleum ether/ethyl acetate (50/1) as eluent afforded the product **3oa** (34.6 mg, 48%) as a yellow liquid.  $^1\text{H}$  NMR (500 MHz,  $\text{CDCl}_3$ )  $\delta$  7.59 – 7.55 (m, 2H), 7.45 (d,  $J = 7.5$  Hz, 1H), 7.38 (t,  $J = 7.5$  Hz, 3H), 2.46 (s, 3H). Spectral data match those previously reported<sup>17</sup>.

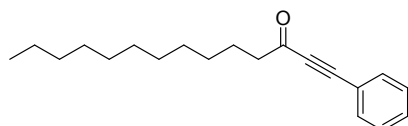

**1-undecyl-3-phenylprop-2-yne-1-one (3pa):** In an oven-dried Teflon septum screw-capped tube (15 mL), N-dodecanoylsaccharin **1p** (0.5 mmol, 1.0 equiv) was reacted with phenylacetylene (0.75 mmol, 1.5 equiv) using standard procedures followed by silica gel column chromatography using petroleum ether/ethyl acetate (50/1) as eluent afforded the product **3pa** (86.6 mg, 58%) as a yellow liquid.  $^1\text{H}$  NMR (400 MHz,  $\text{CDCl}_3$ )  $\delta$  7.62 – 7.51 (m, 2H), 7.48 – 7.42 (m, 1H), 7.41 – 7.35 (m, 2H), 2.66 (t,  $J =$

7.4 Hz, 2H), 1.78 – 1.69 (m, 2H), 1.25 (s, 16H), 0.87 (t,  $J = 6.8$  Hz, 3H). Spectral data match those previously reported<sup>17</sup>.

## References

- 1 T. Ueda, H. Konishi and K. Manabe, *Angew. Chem. Int. Ed.*, 2013, **52**, 8611–8615;
- 2 G. R. Meng and M. Szostak, *Org. Lett.*, 2016, **18**, 796–799;
- 3 X. J. Li and G. Zou, *Chem. Commun.*, 2015, **51**, 5089–5092;
- 4 G. R. Meng and M. Szostak, *Org. Lett.*, 2015, **17**, 4364–4367;
- 5 K. Phukan, *International Journal of Applied Biology and Pharmaceutical Technology.*, 2014, **5**, 171–175;
- 6 S. Tang, L. Zeng, Y. C. Liu and A. W. Lei, *Angew. Chem. Int. Ed.*, 2015, **54**, 15850–15853;
- 7 H. Tan, H. J. Li, W. Q. Ji and L. Wang, *Angew. Chem. Int. Ed.*, 2015, **54**, 8374–8377;
- 8 R. E. Whittaker and G. B. Dong, *Org. Lett.*, 2015, **17**, 5504–5507;
- 9 S. Karabiyikoglu, Y. Kelgokmen and M. Zora, *Tetrahedron.*, 2015, **71**, 4324–4333;
- 10 X.-F. Wu, H. J. Jun, H. Neumann and M. Beller, *Chem. Eur. J.*, 2012, **18**, 16177–16185;
- 11 X.-F. Wu, H. Neumann and M. Beller, *Angew. Chem. Int. Ed.*, 2011, **50**, 11142–11146;
- 12 B. Yu, H. M. Sun, Z. Y. Xie, L. W. Xu, W. Q. Zhang and Z. W. Gao, *Org. Lett.*, 2015, **17**, 3298–3301;
- 13 X. W. Li, X. H. Liu, H. J. Chen, W. Q. Wu, C. R. Qi and H. F. Jiang, *Angew. Chem. Int. Ed.*, 2014, **53**, 14485–14489;
- 14 Y. Ogiwara, M. Kubota, K. Kurogi, T. Konakahara and N. Sakai, *Chem. Eur. J.*, 2015, **21**, 18598–18600;
- 15 X.-F. Wu, B. Sundaraju, H. Neumann, P. H. Dixneuf and M. Beller, *Chem. Eur. J.*, 2011, **17**, 106–110;
- 16 M. D. D. Pramanik, R. Kant and N. Rastogi, *Tetrahedron.*, 2014, **70**, 5214–5220;
- 17 Q.-Q. Zhou, W. Guo, W. Ding, X. Xu, X. Chen, L. Q. Lu and W.-J. Xiao, *Angew. Chem. Int. Ed.*, 2015, **54**, 11196–11199;

## Copies of $^1\text{H}$ NMR, $^{19}\text{F}$ NMR and $^{13}\text{C}$ NMR of Starting Materials

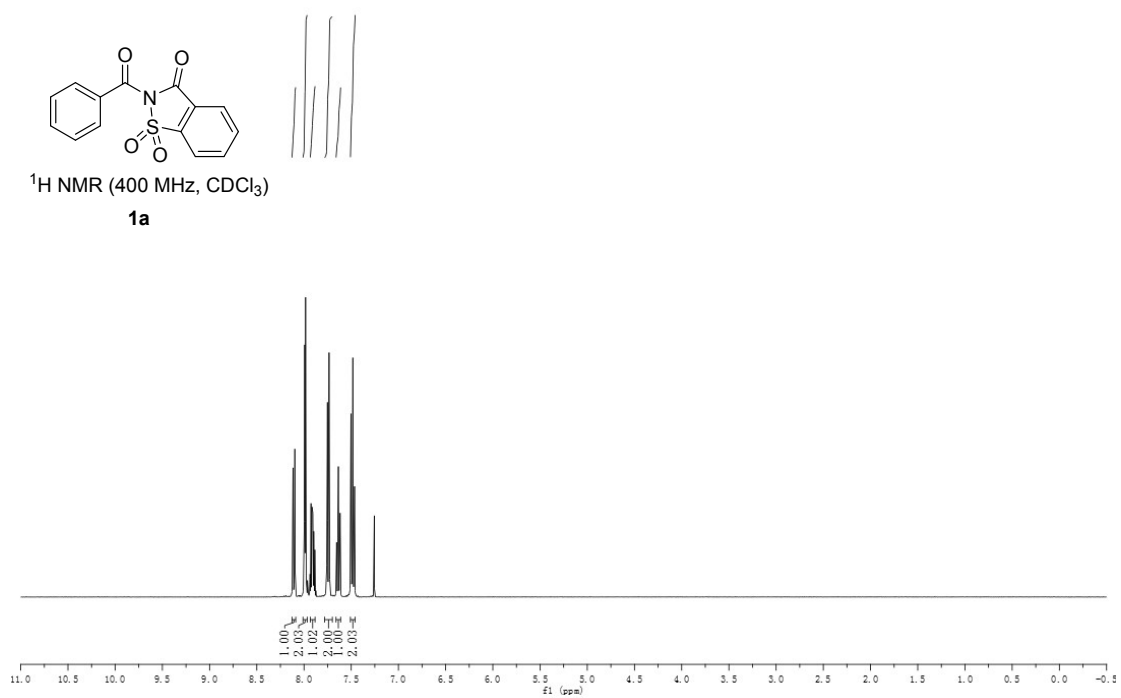

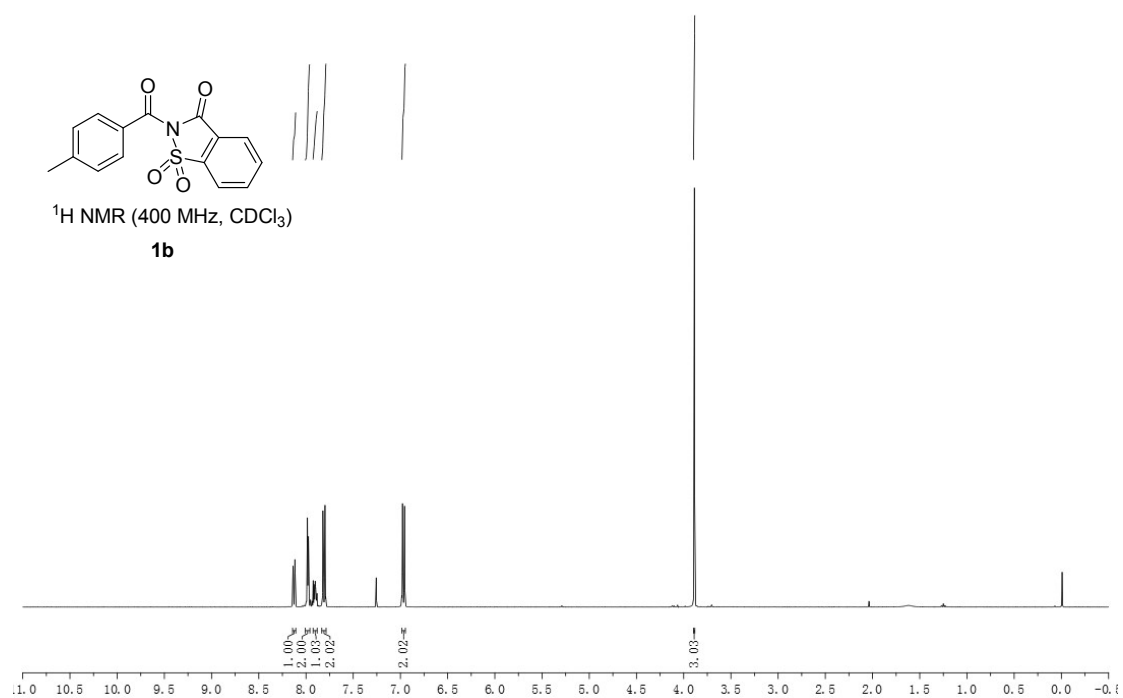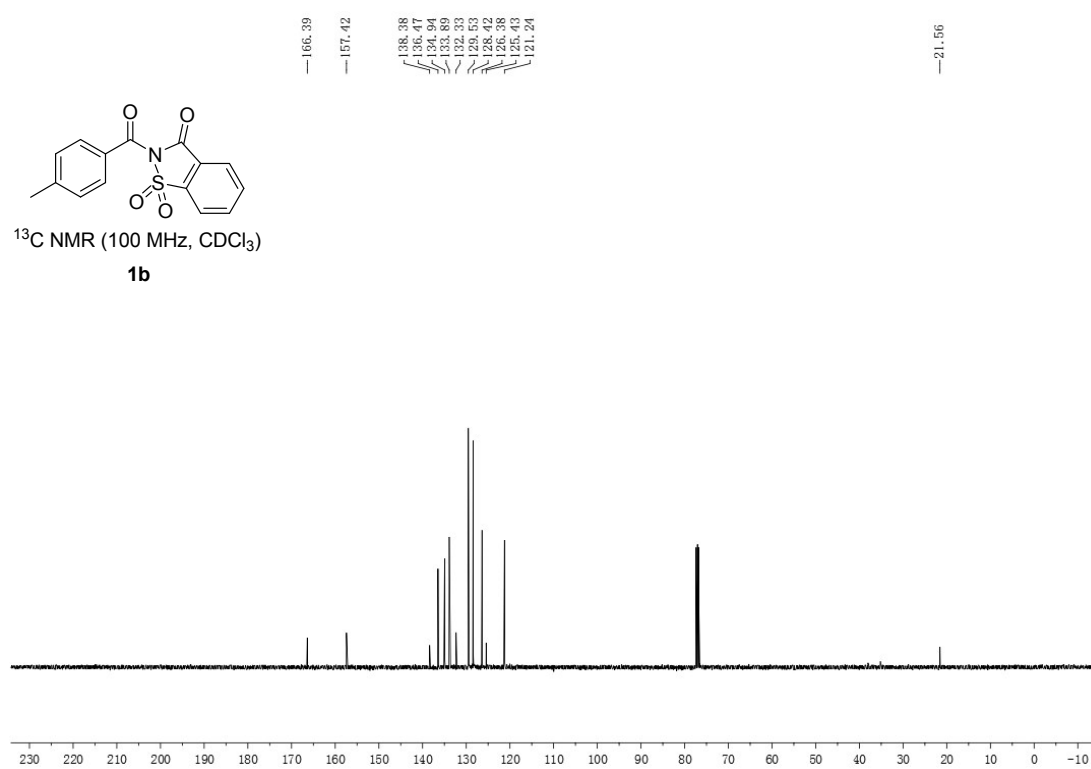

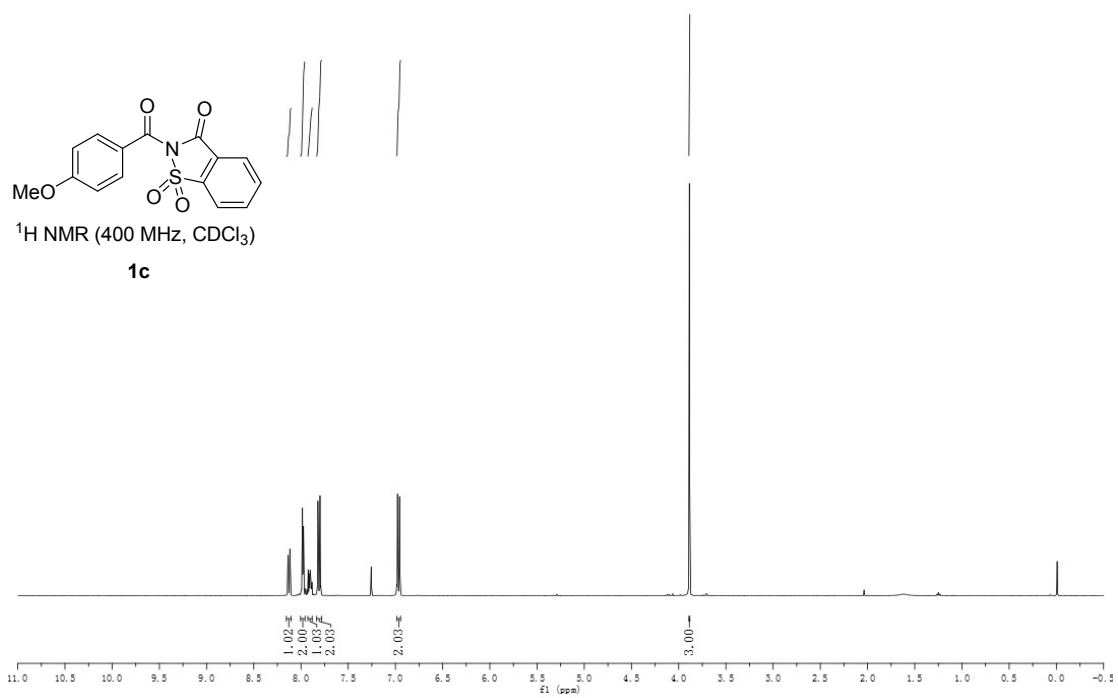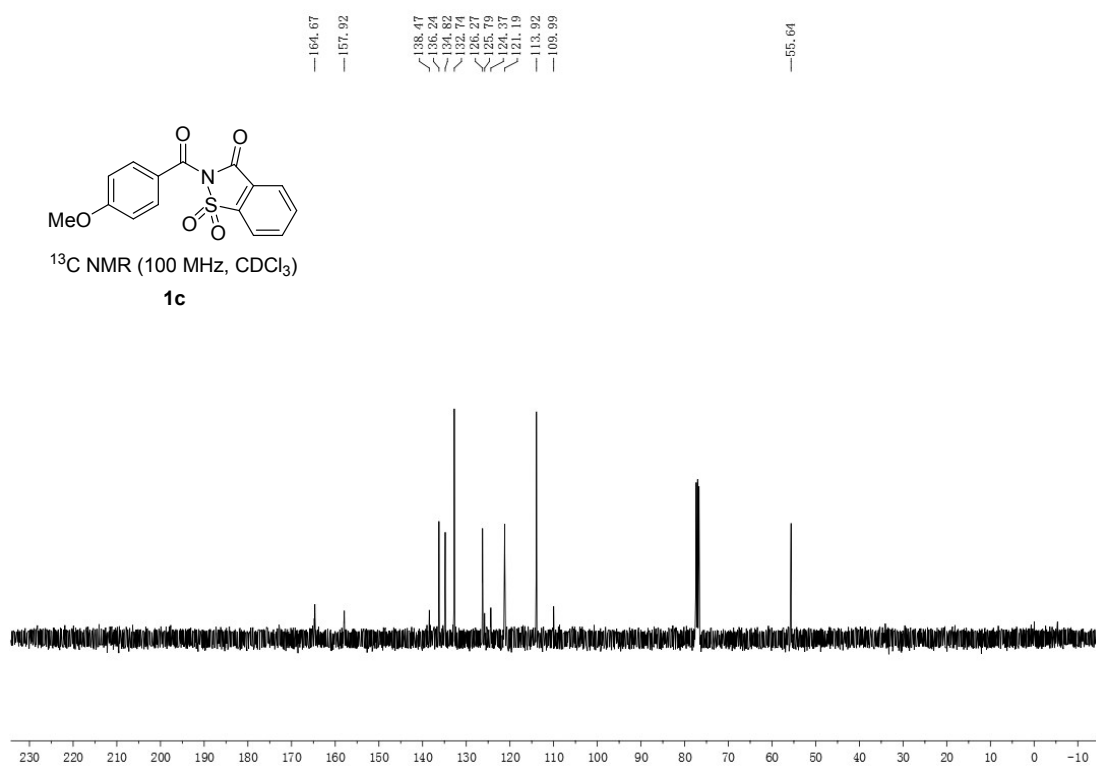

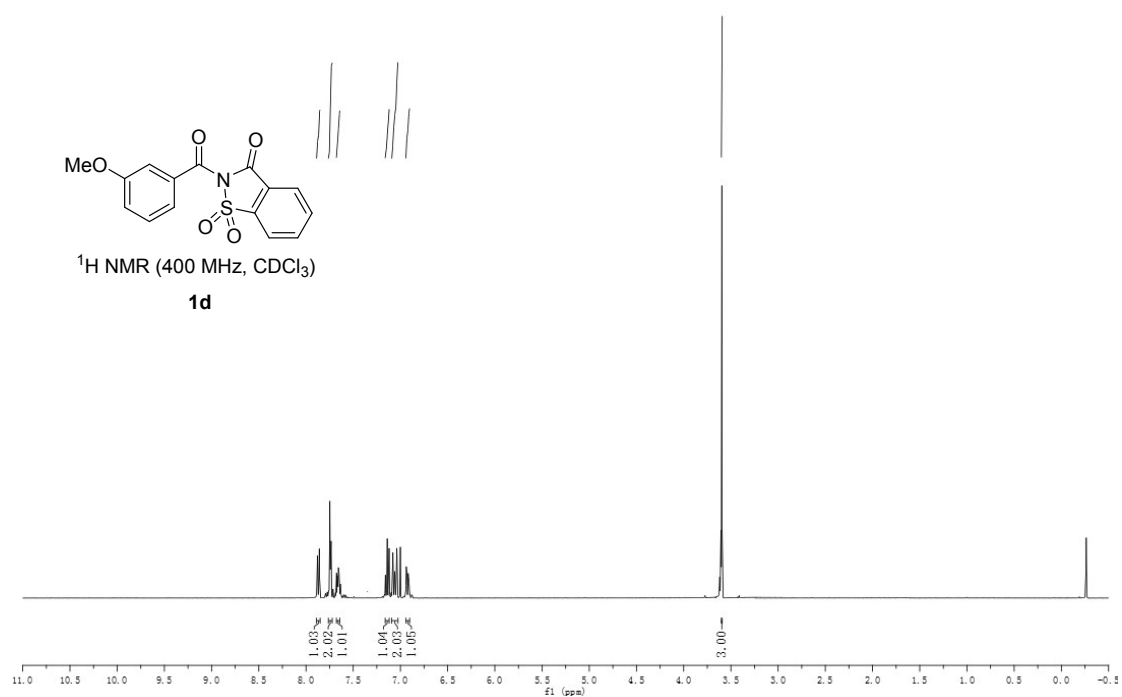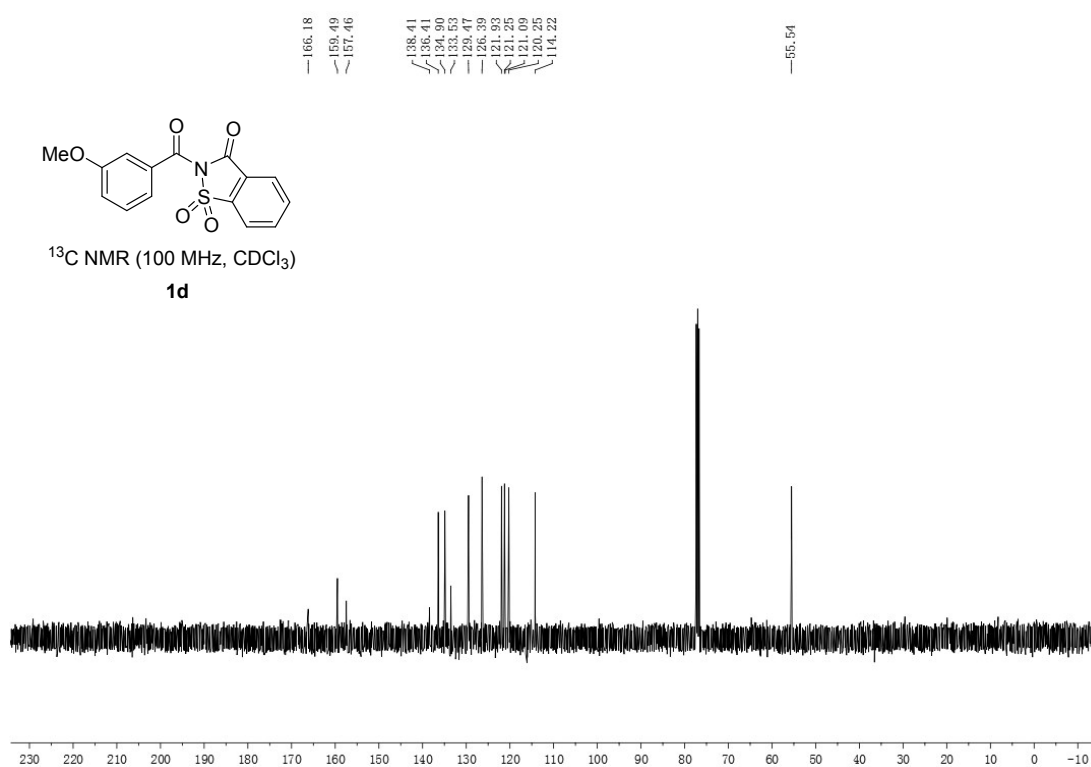

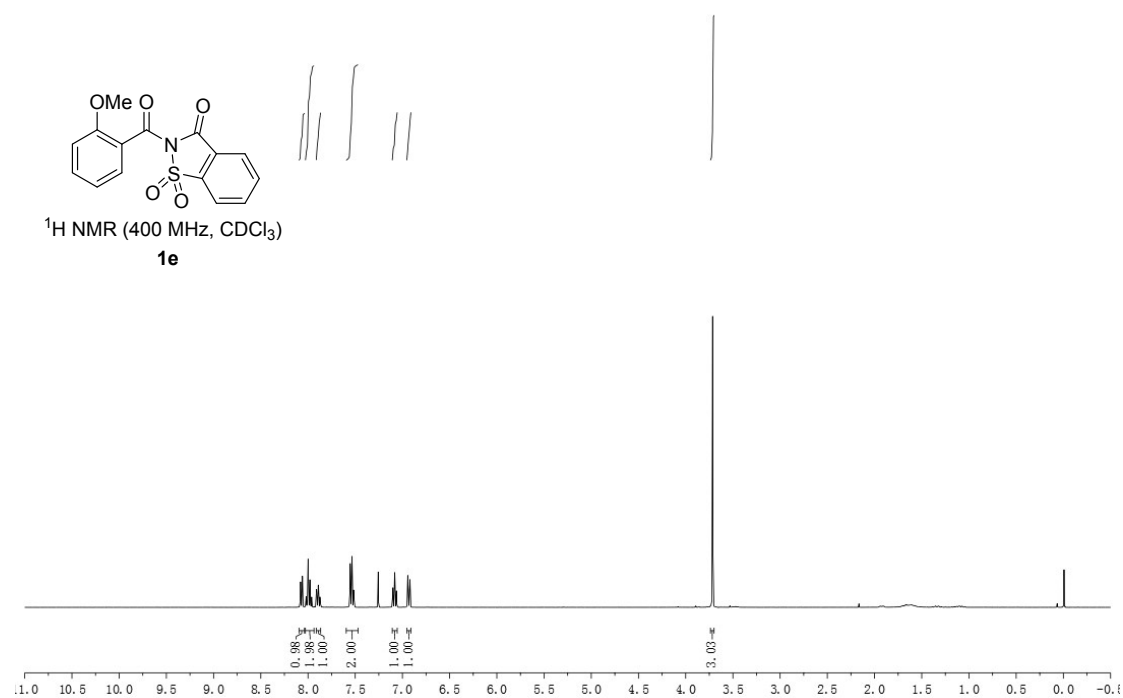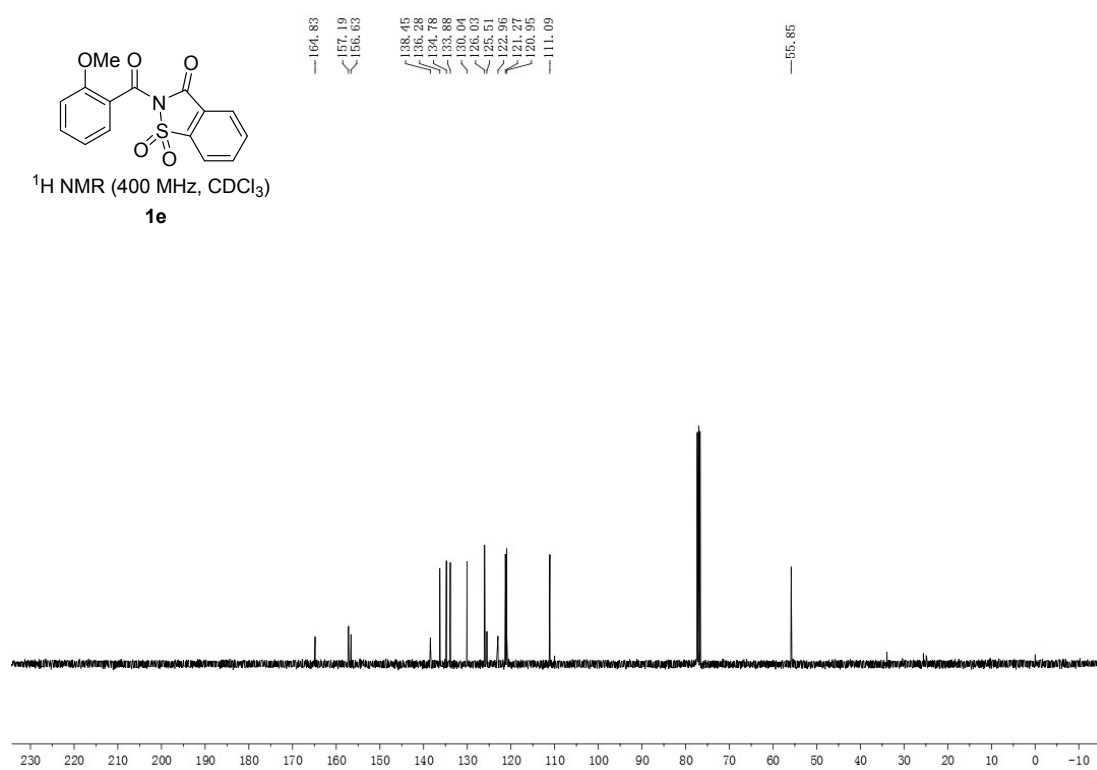

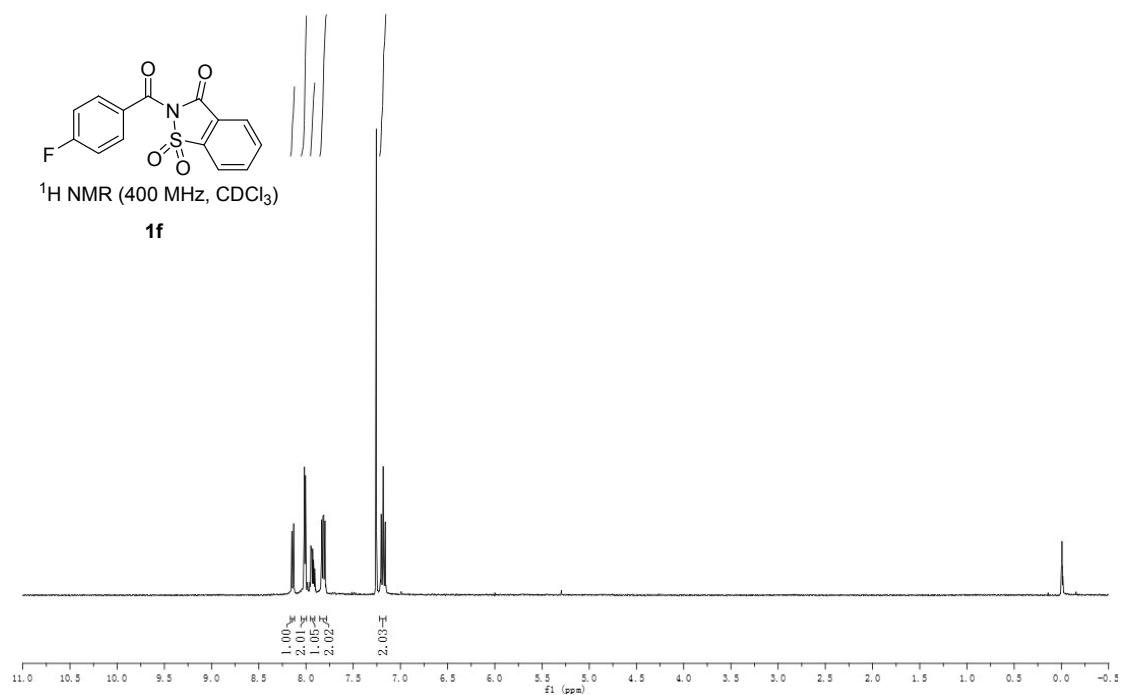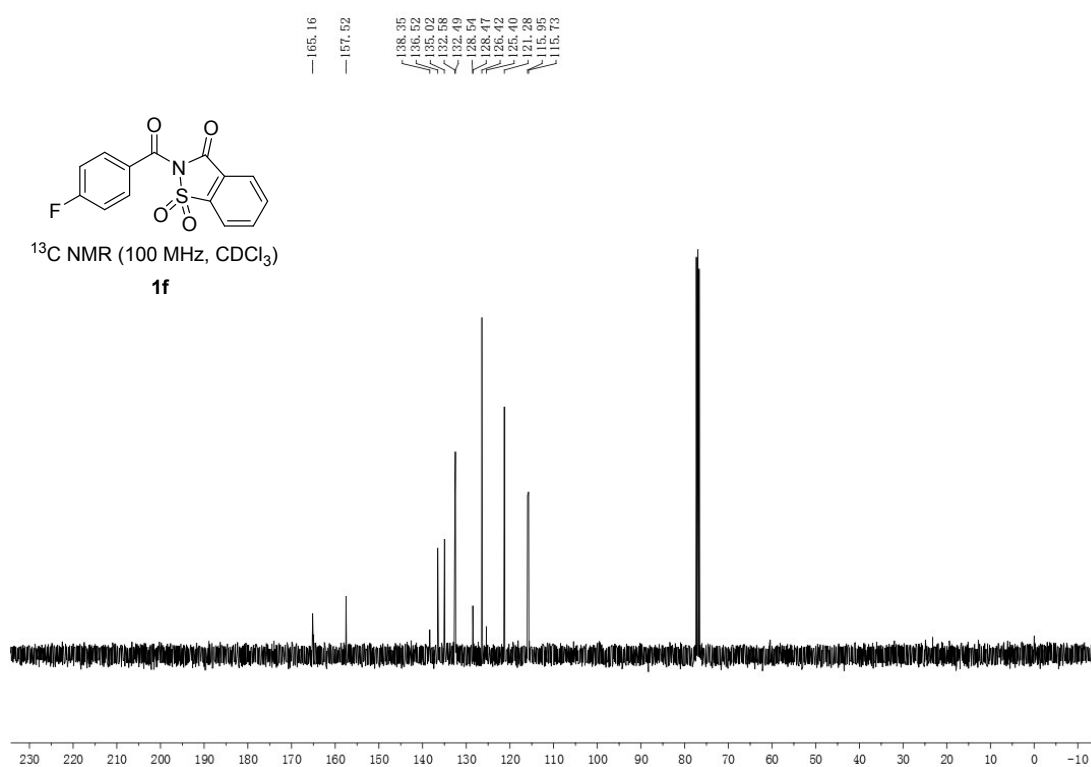

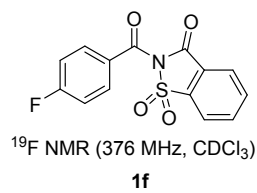

102.58  
 102.60  
 102.61  
 102.61  
 102.62  
 102.62  
 102.63  
 102.64  
 102.66

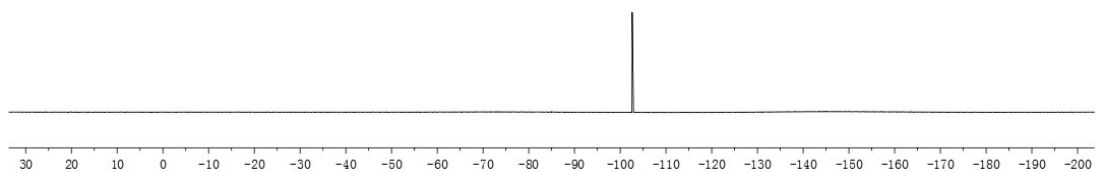

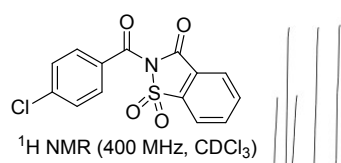

**1g**

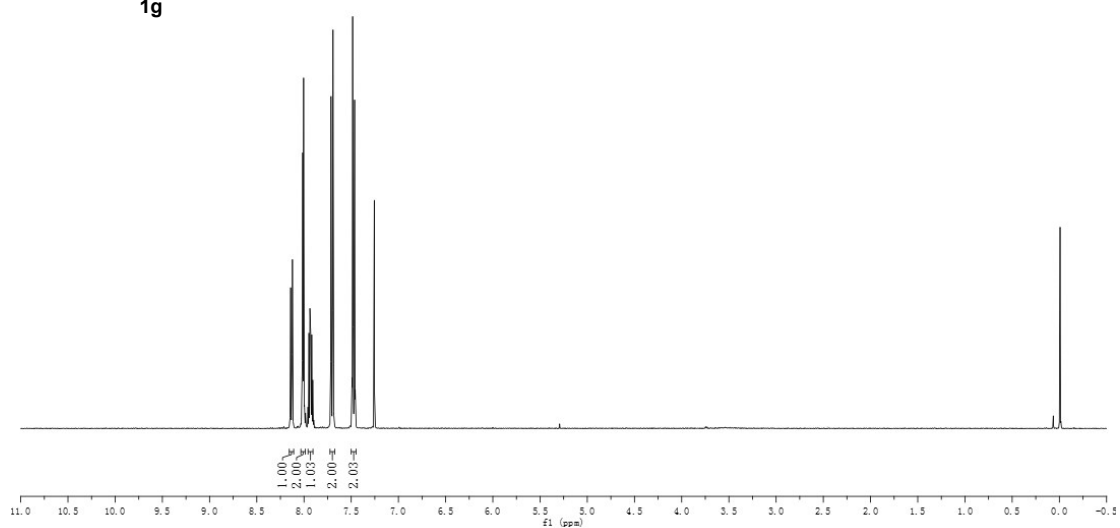

— 165.39  
 — 157.41  
 140.51  
 138.38  
 136.94  
 134.88  
 130.98  
 130.66  
 128.85  
 126.45  
 125.34  
 121.29

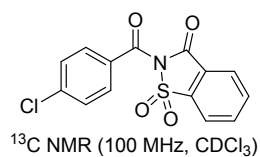

**1g**

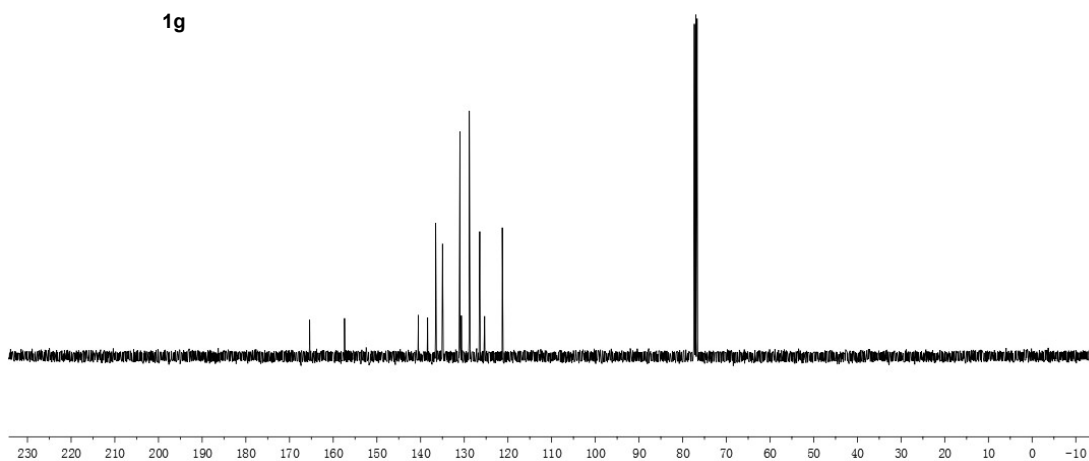

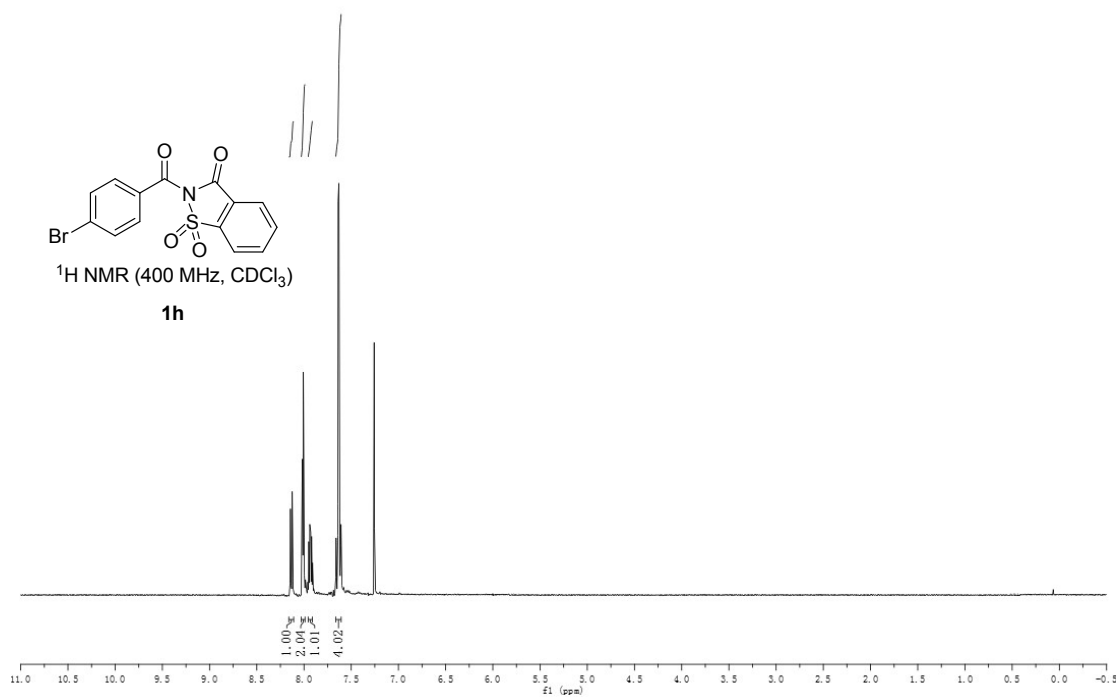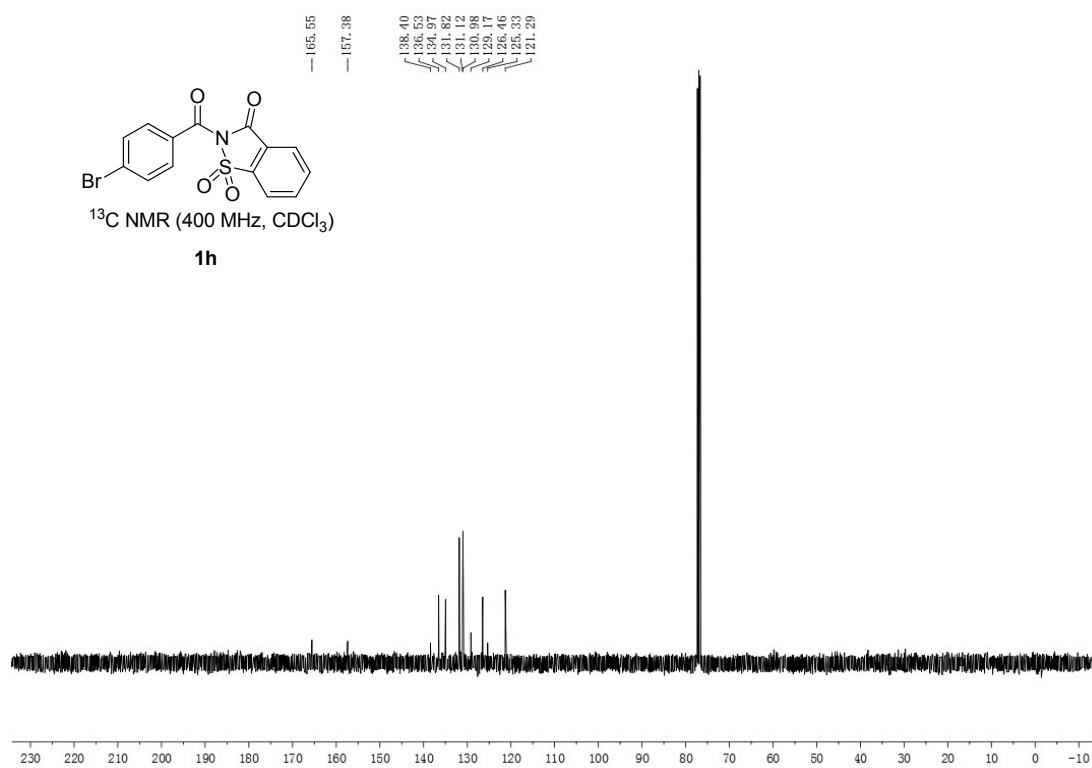

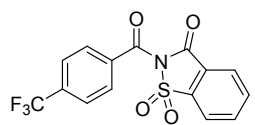

<sup>1</sup>H NMR (400 MHz, CDCl<sub>3</sub>)  
**1i**

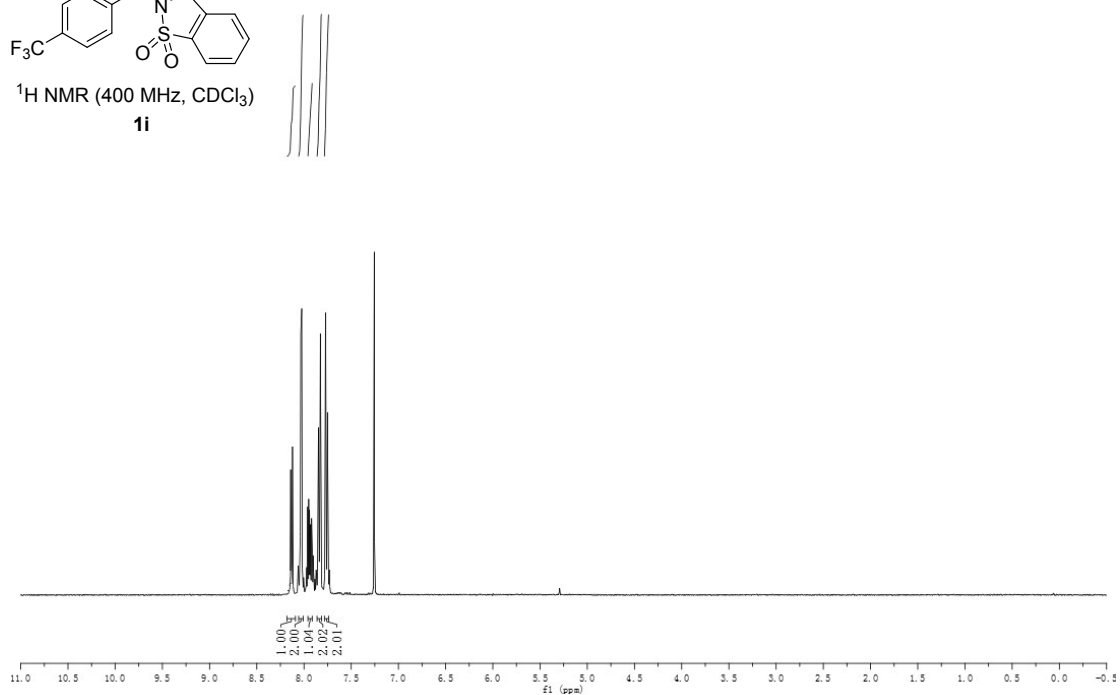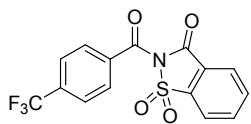

<sup>13</sup>C NMR (100 MHz, CDCl<sub>3</sub>)  
**1i**

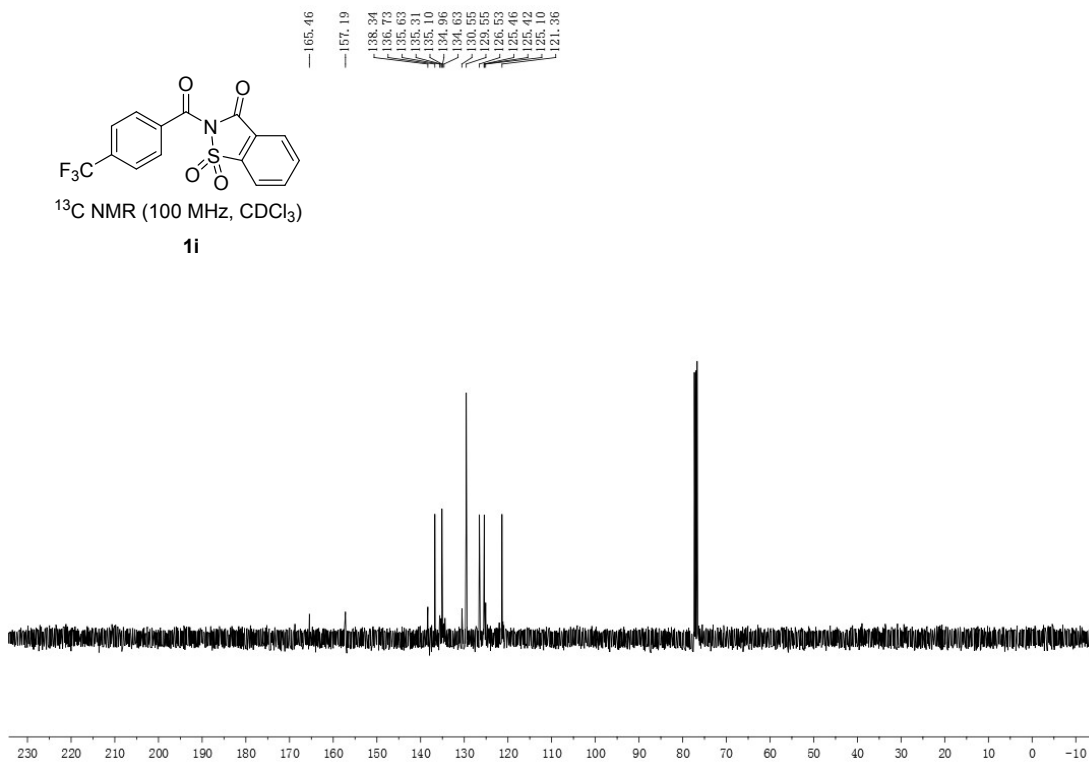

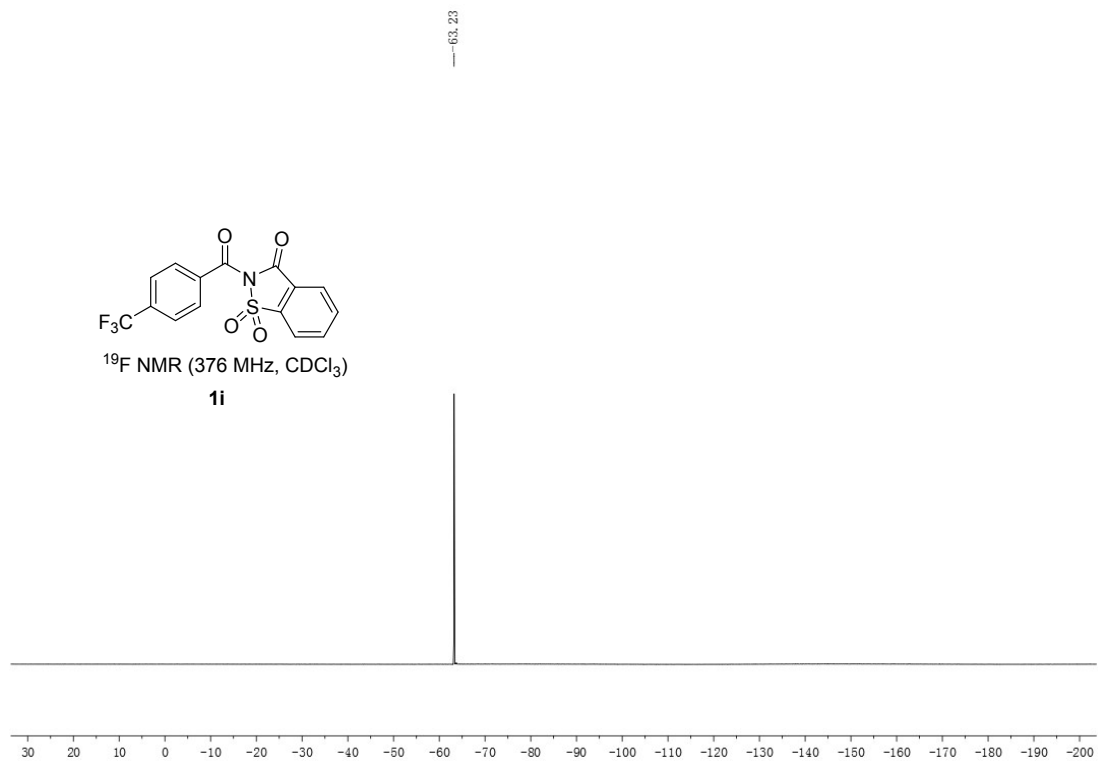

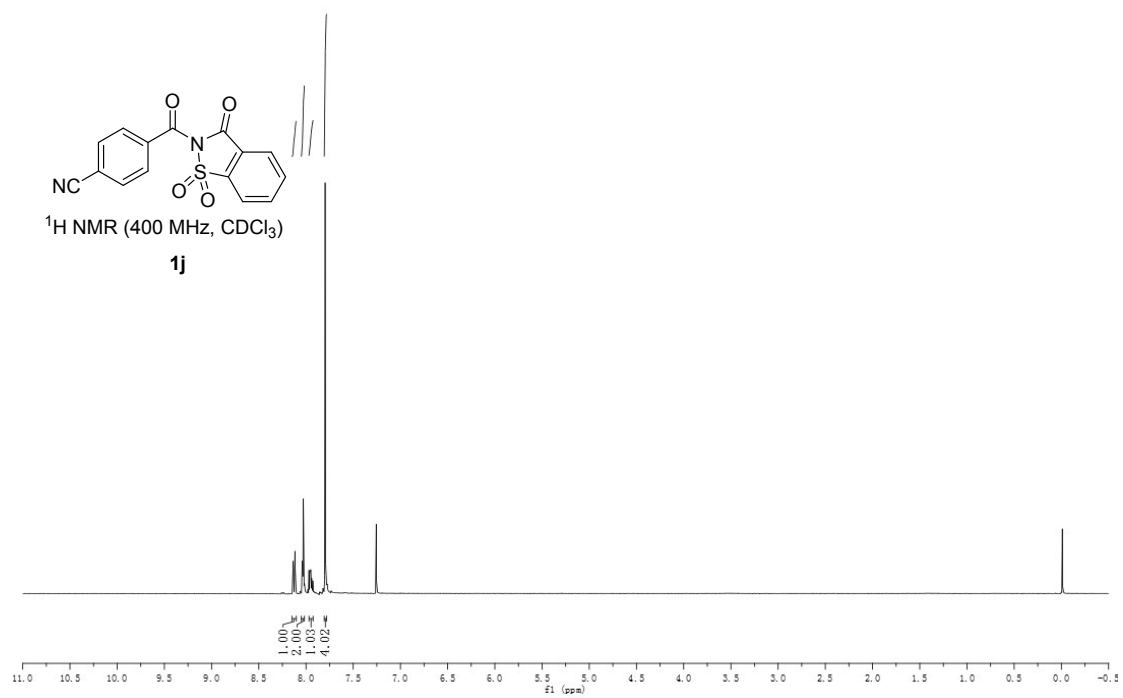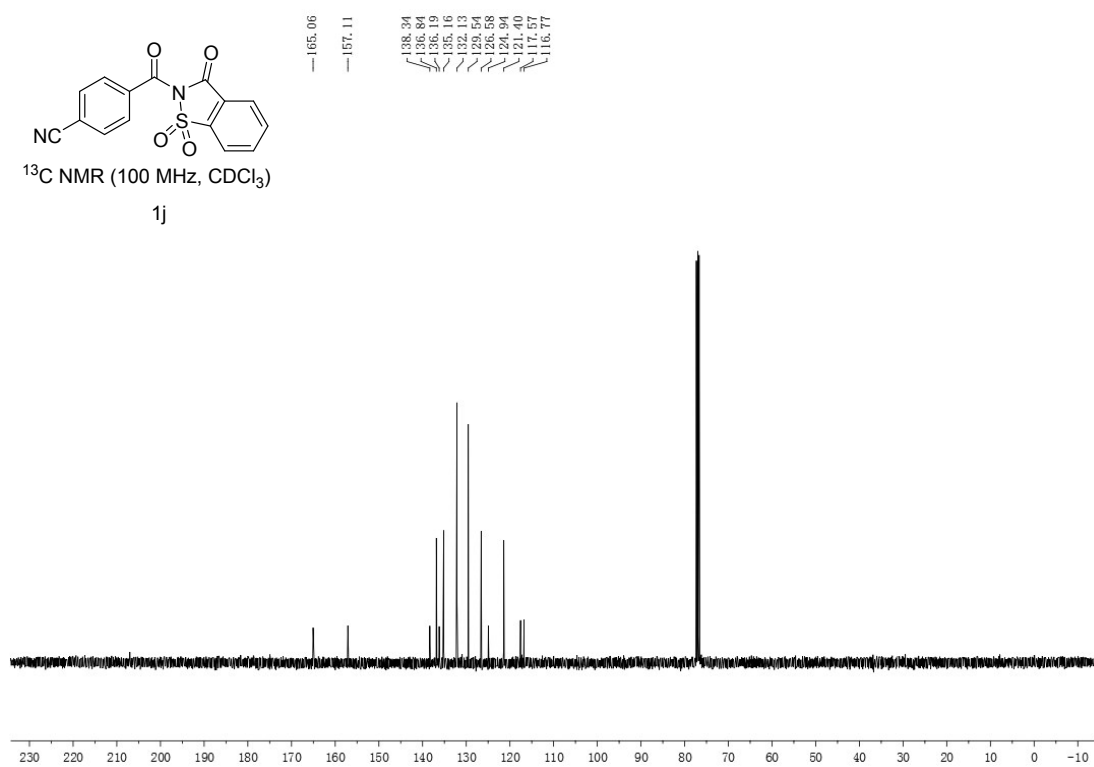

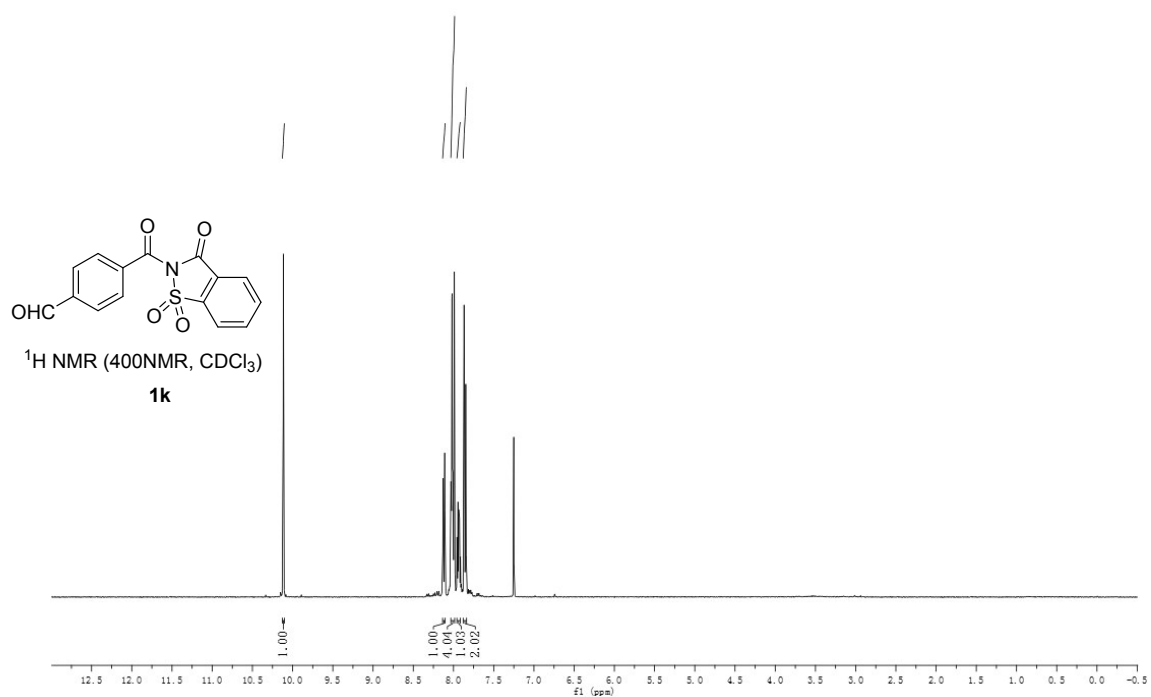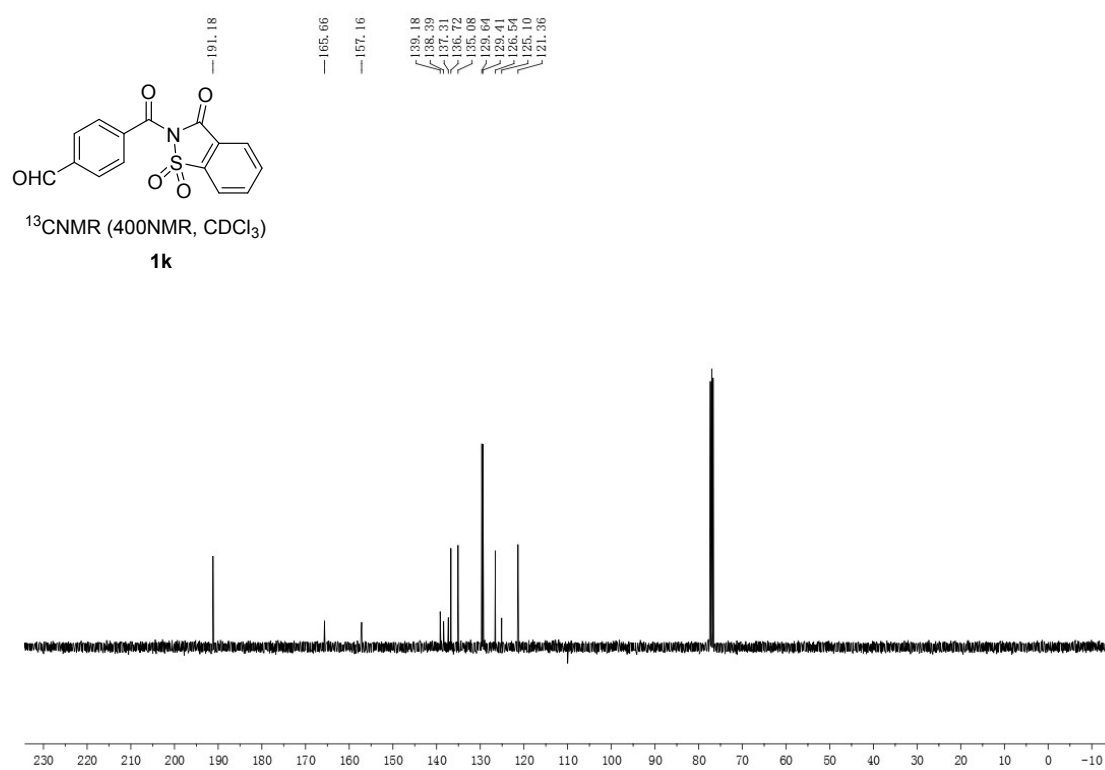

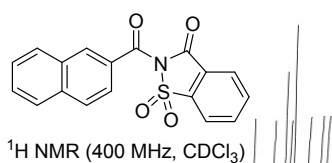

11

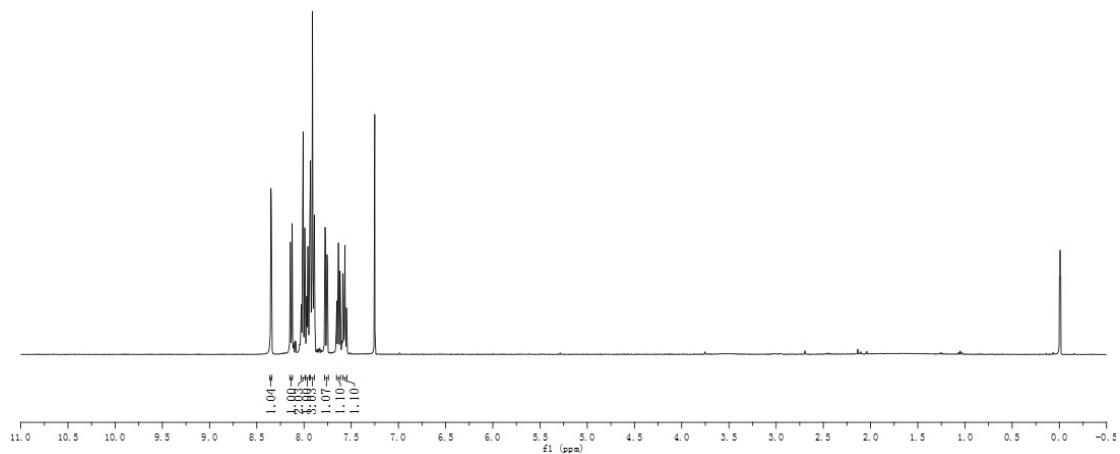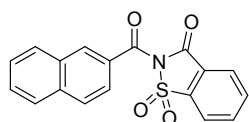

<sup>13</sup>C NMR (100 MHz, CDCl<sub>3</sub>)

11

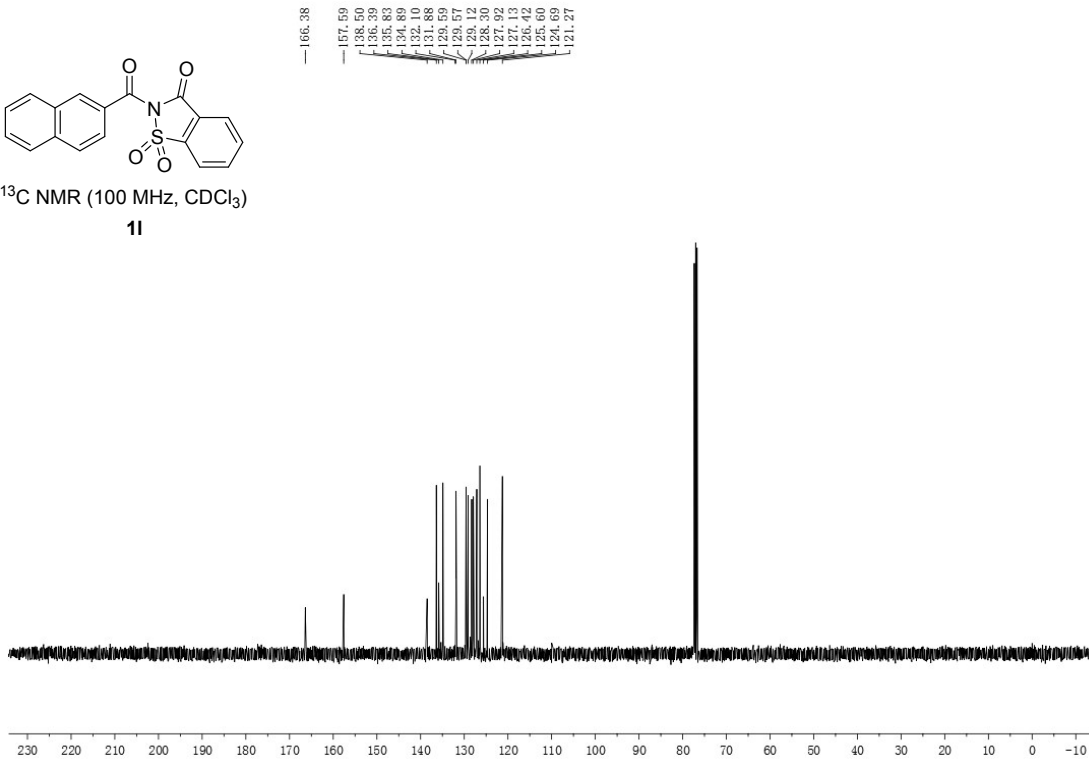

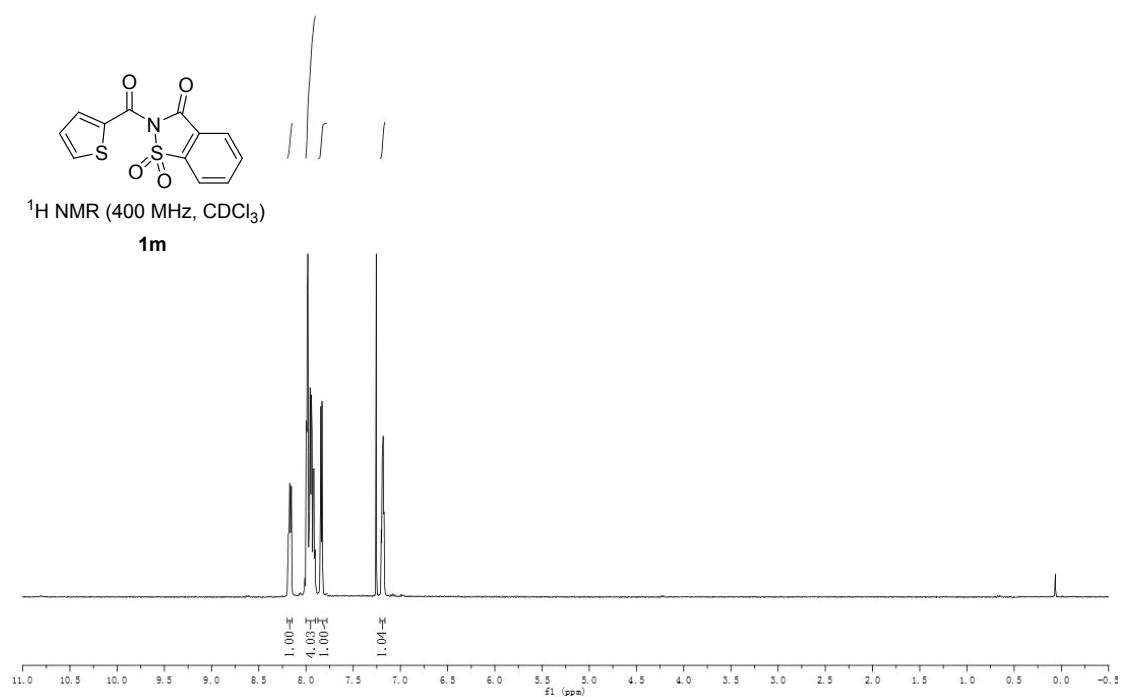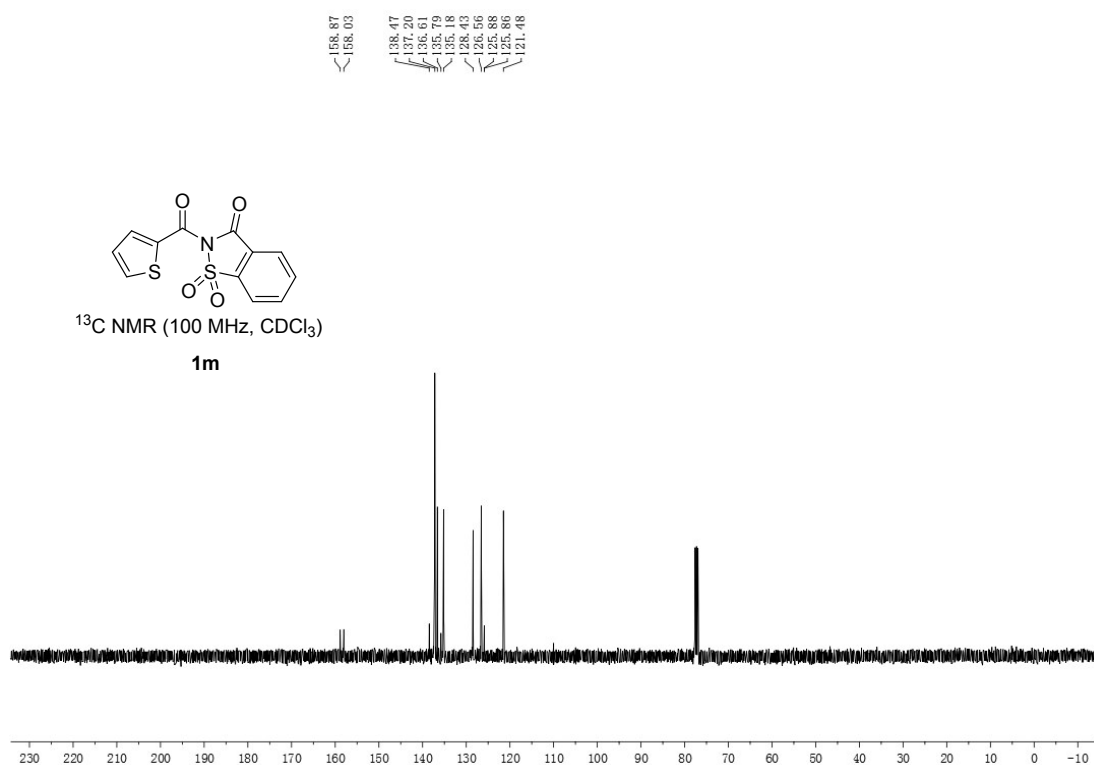

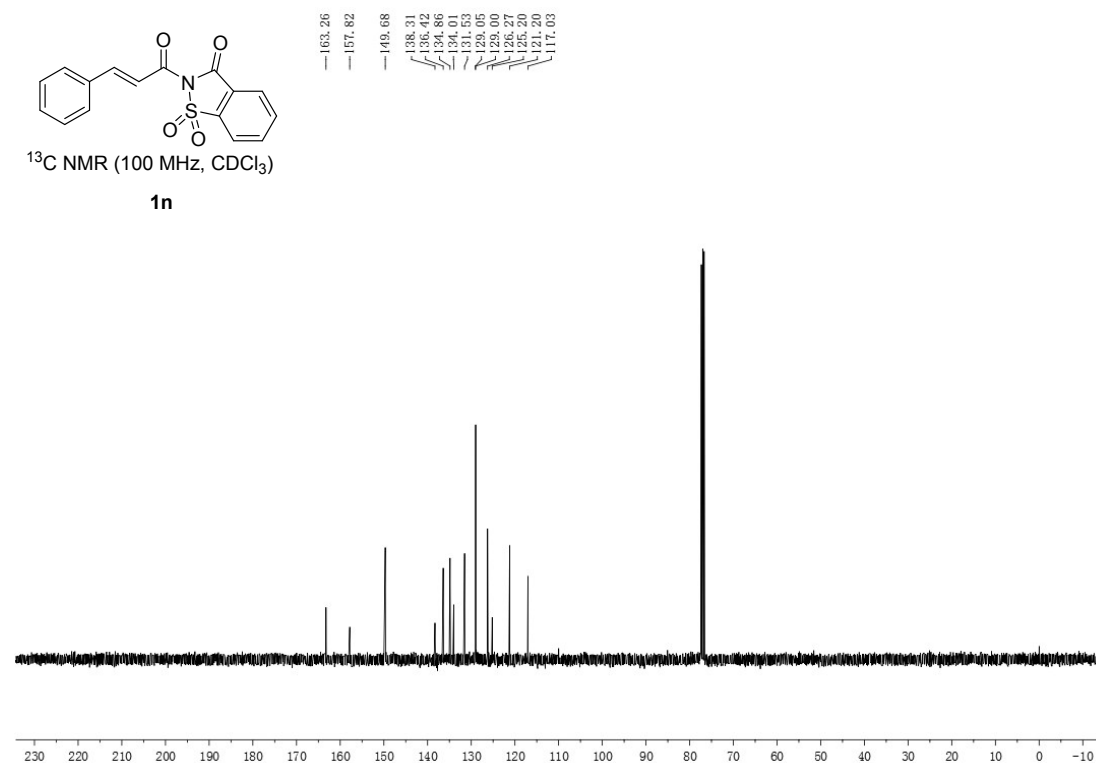

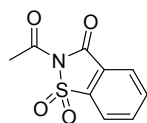

<sup>1</sup>H NMR (400 MHz, CDCl<sub>3</sub>)

**1o**

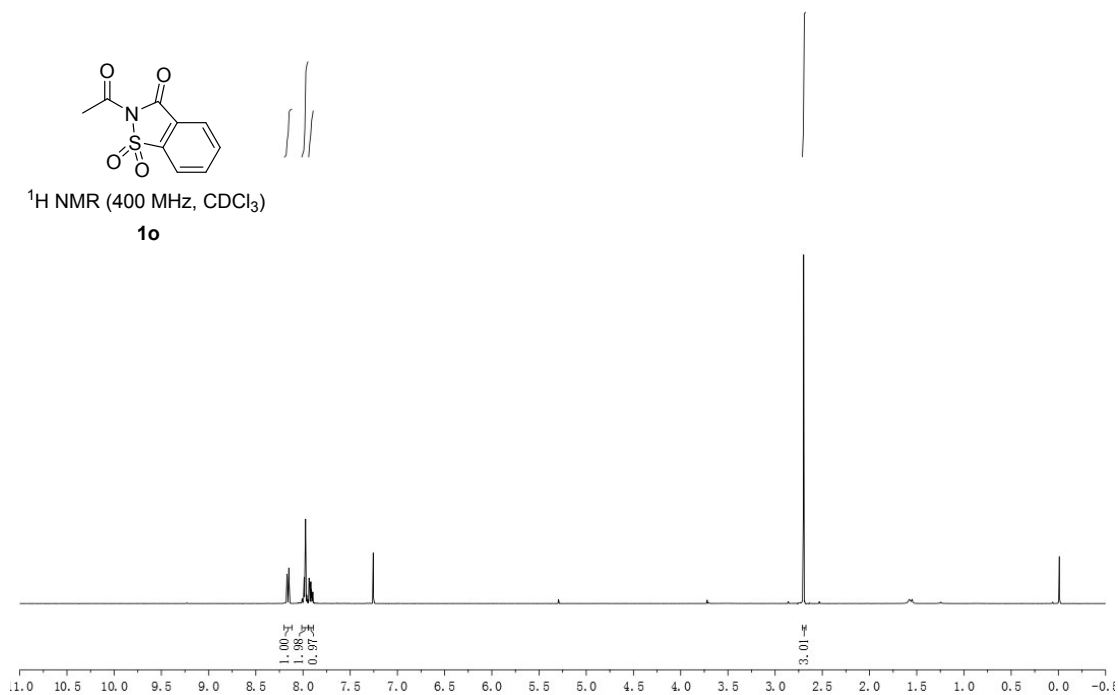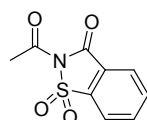

<sup>13</sup>C NMR (100 MHz, CDCl<sub>3</sub>)

**1o**

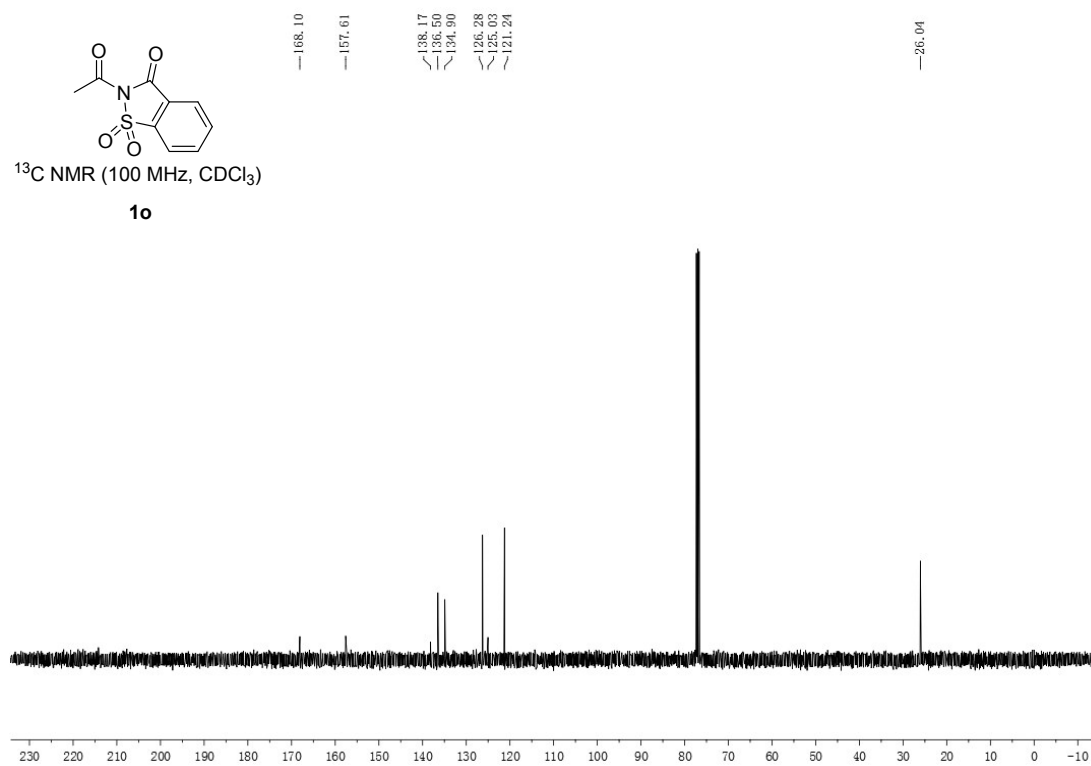

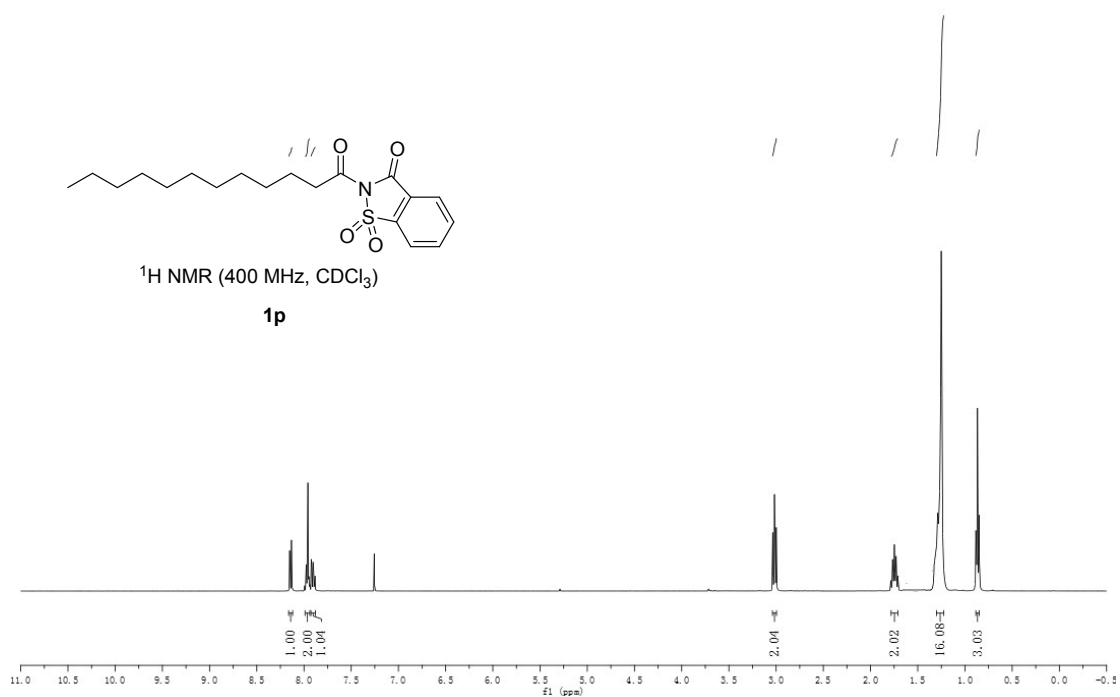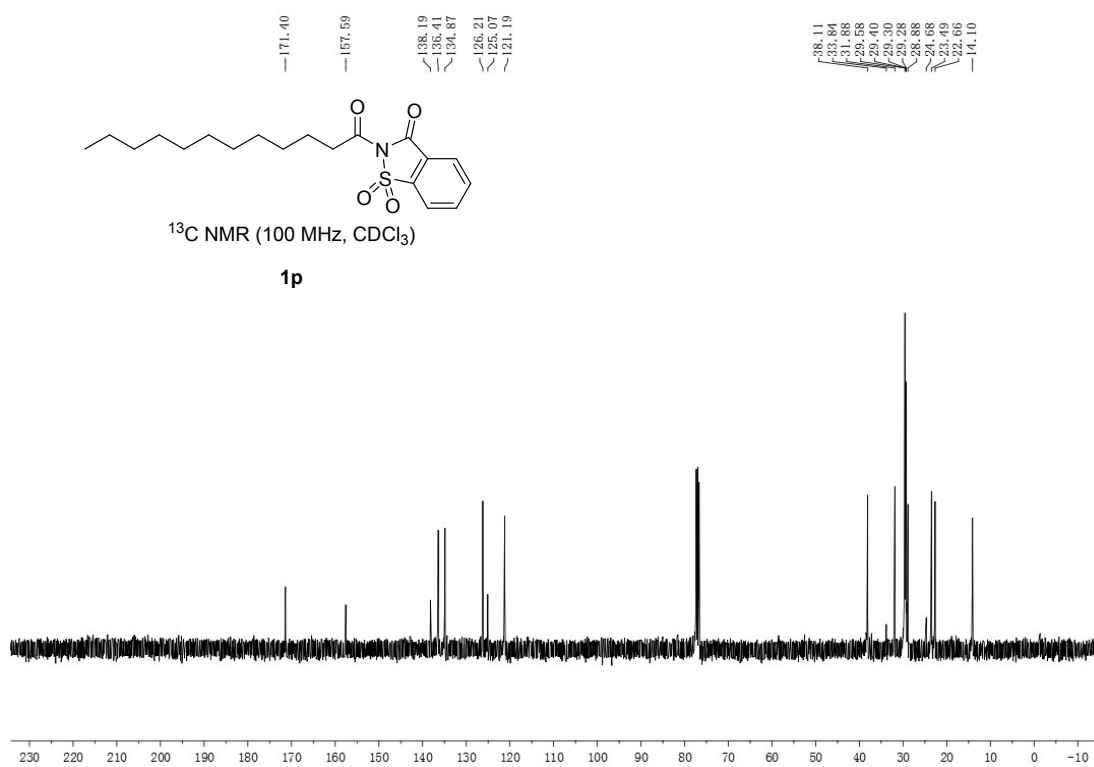

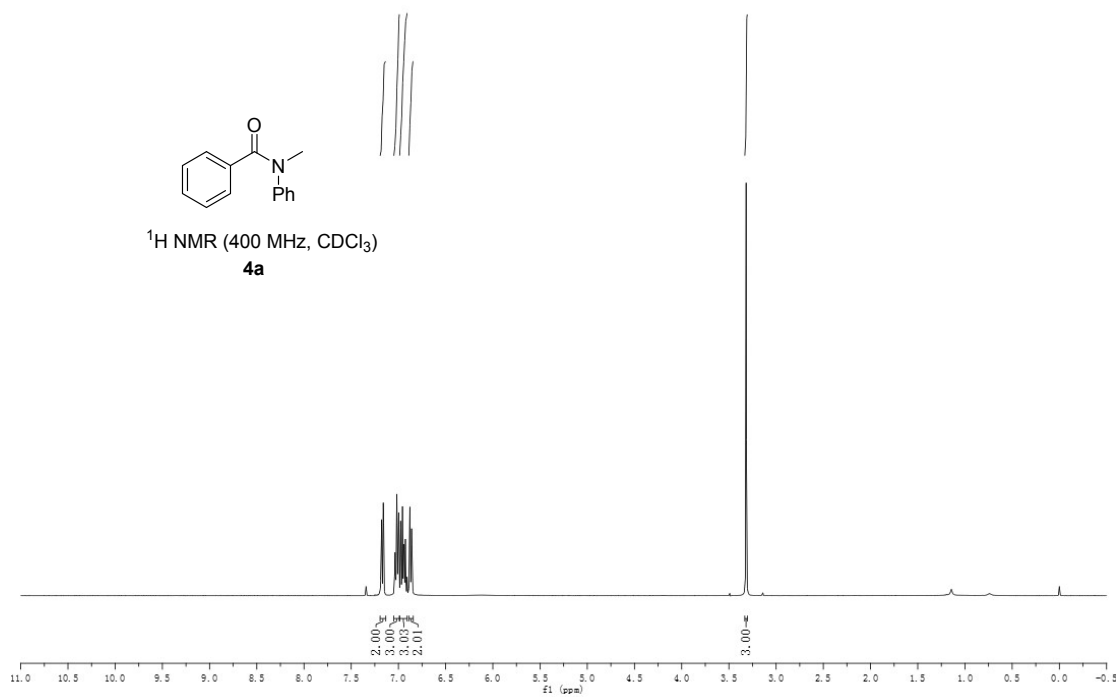

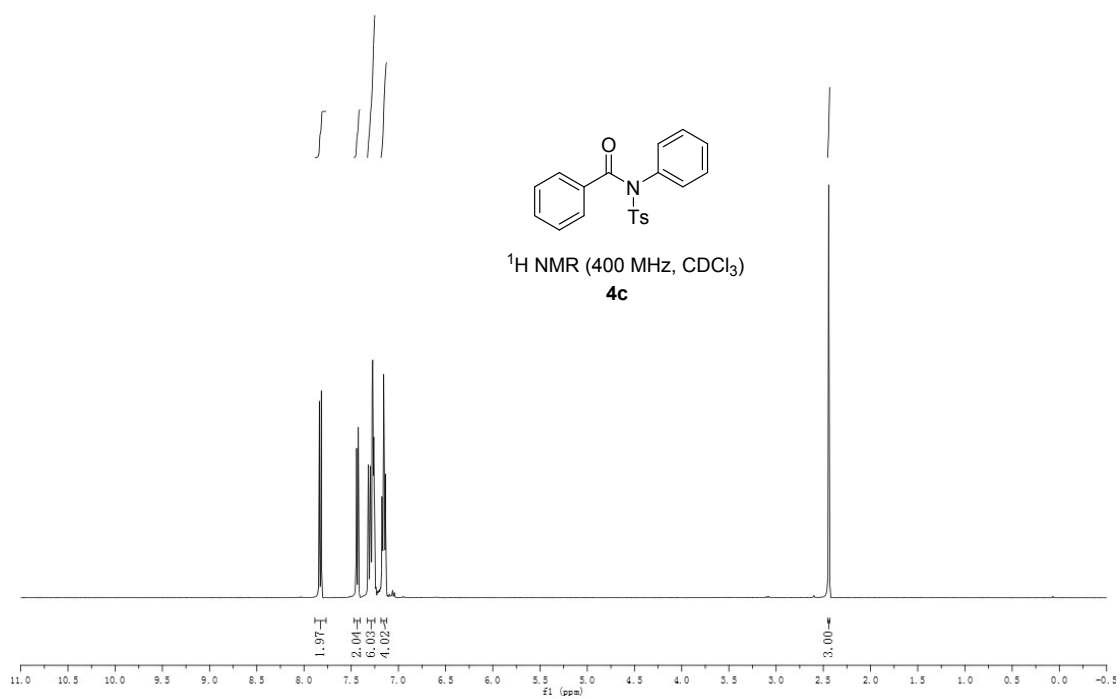

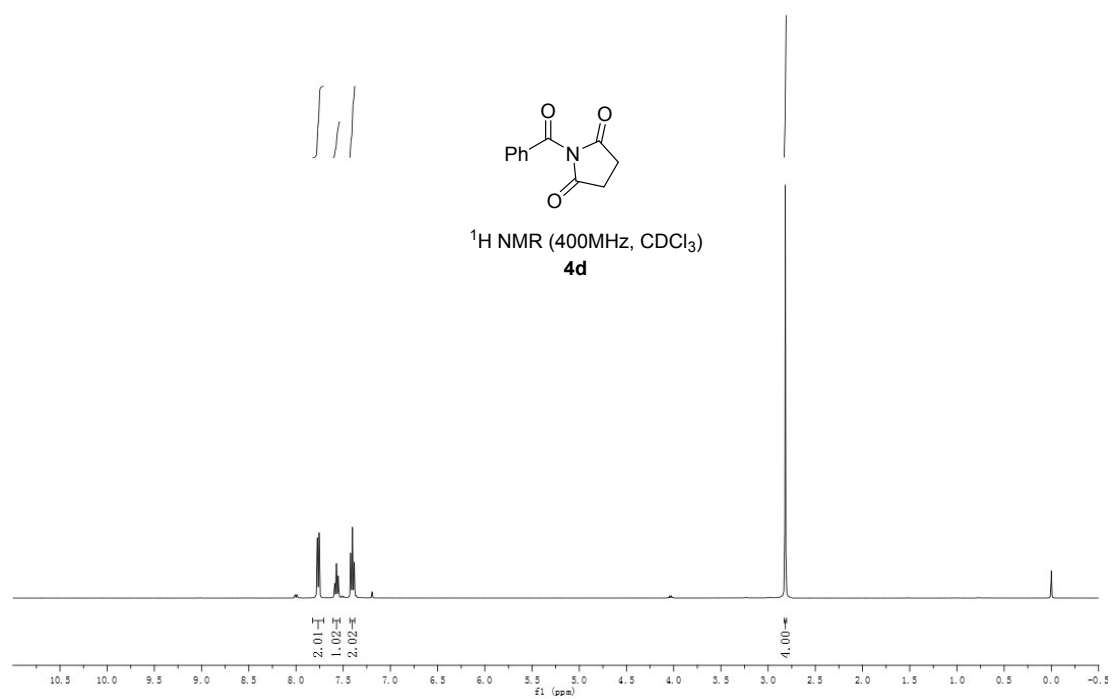



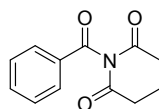

<sup>1</sup>H NMR (400 MHz, CDCl<sub>3</sub>)  
**4f**

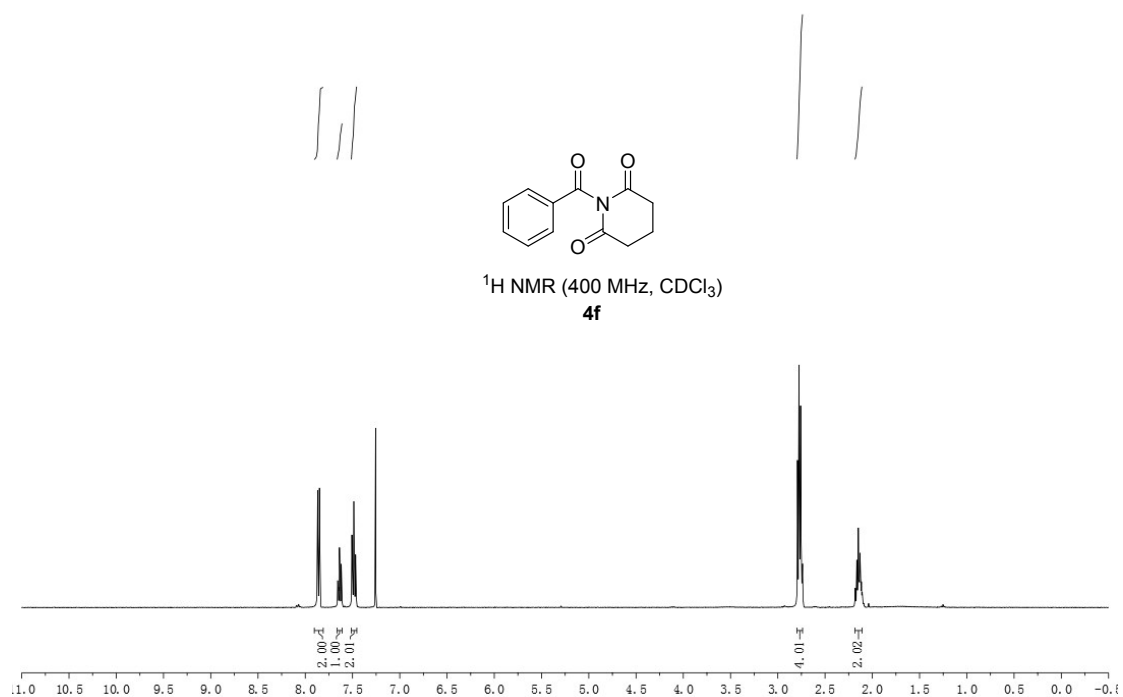

Copies of  $^1\text{H}$  NMR,  $^{19}\text{F}$  NMR of Products

3aa

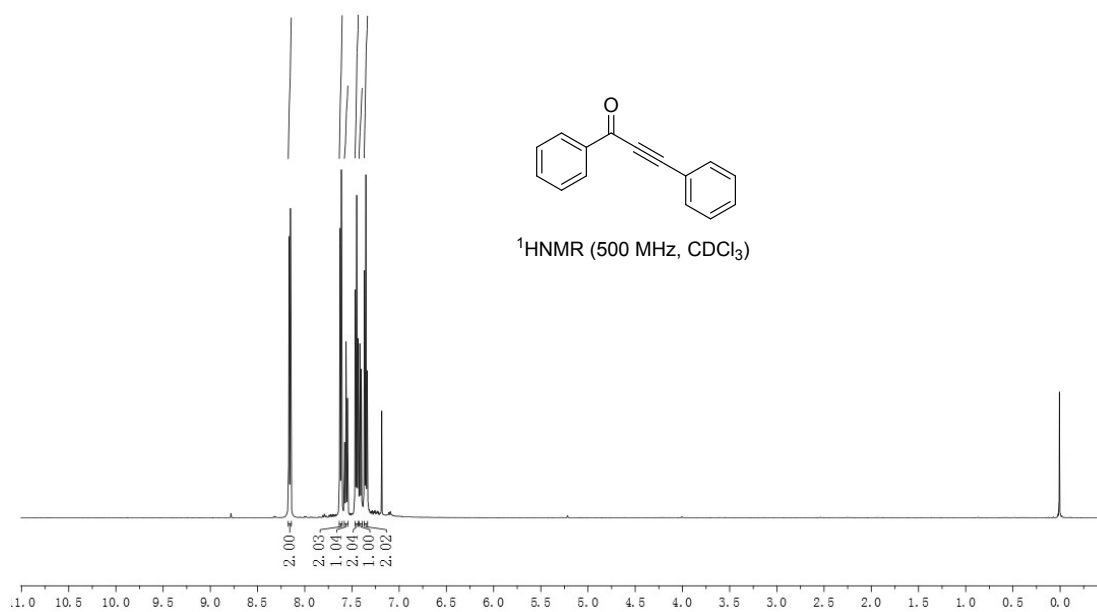

3ab

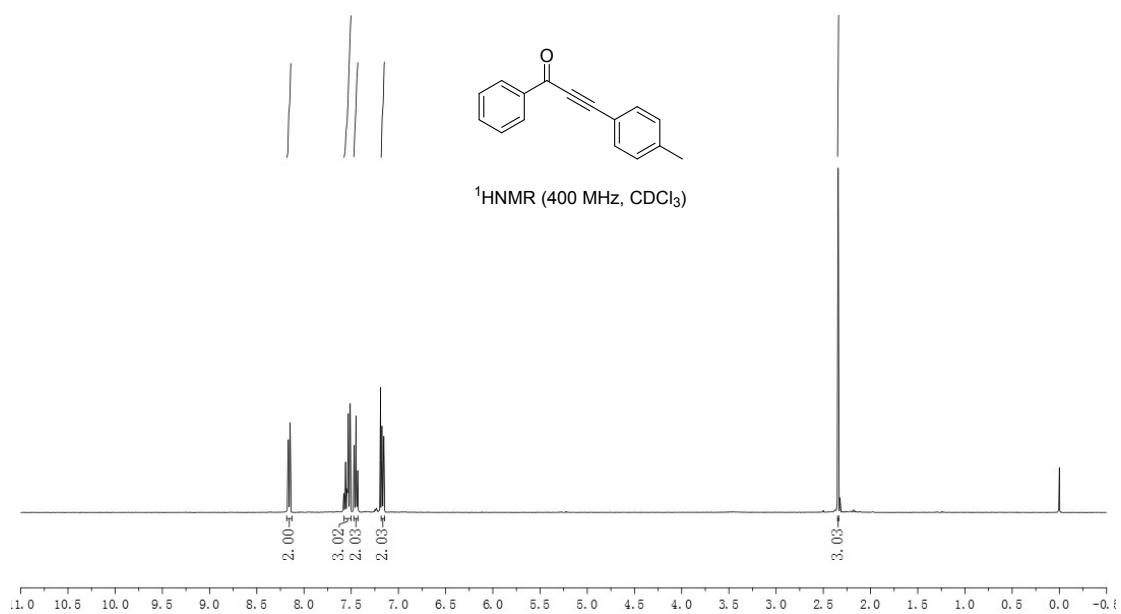

3ac

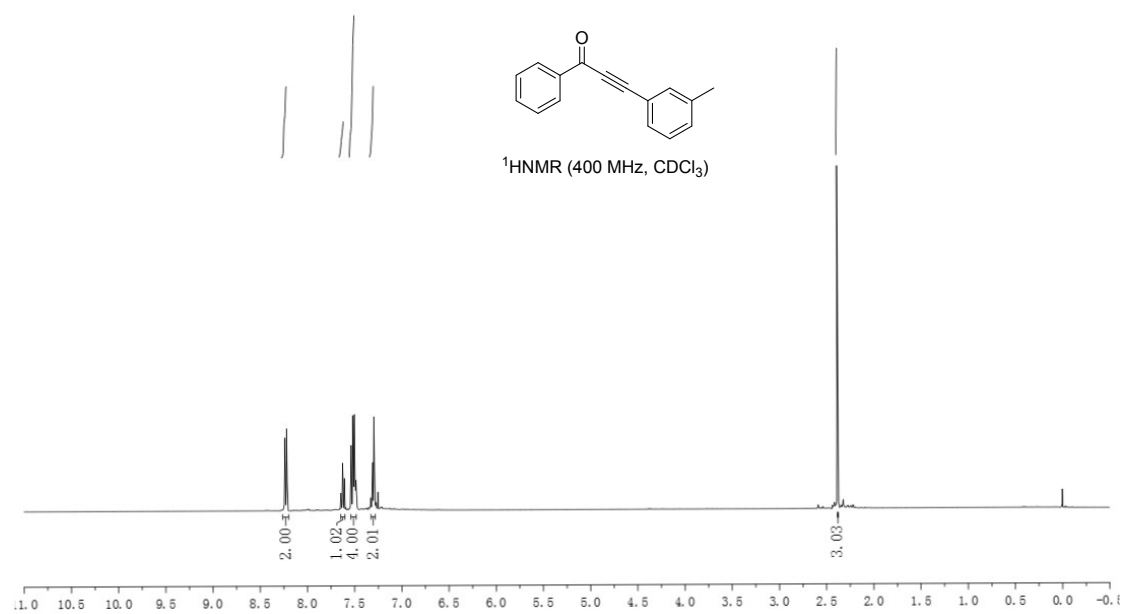

3ad

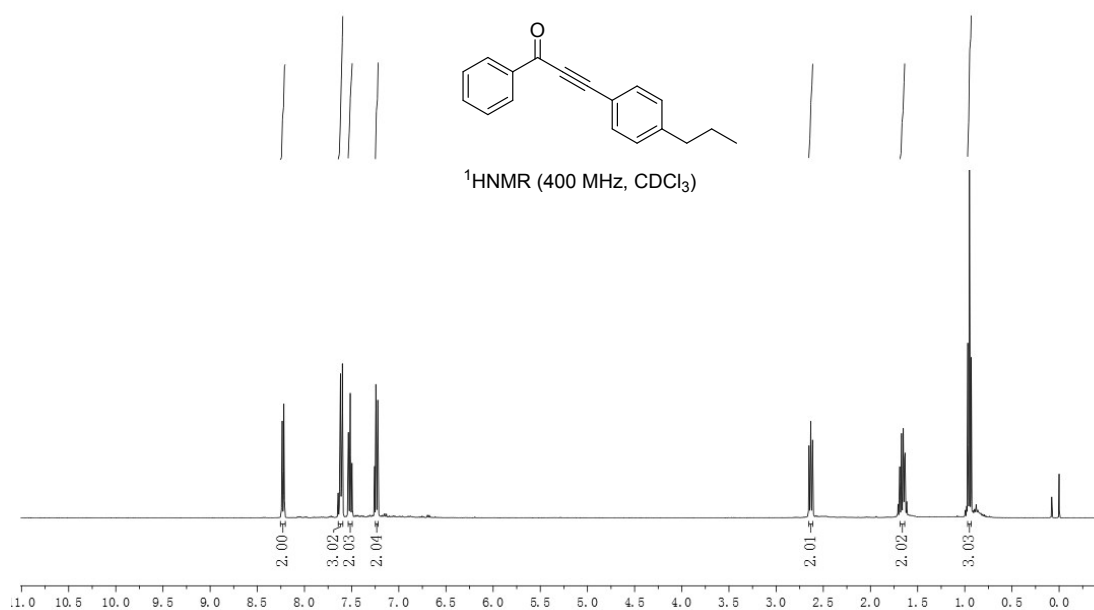

3ae

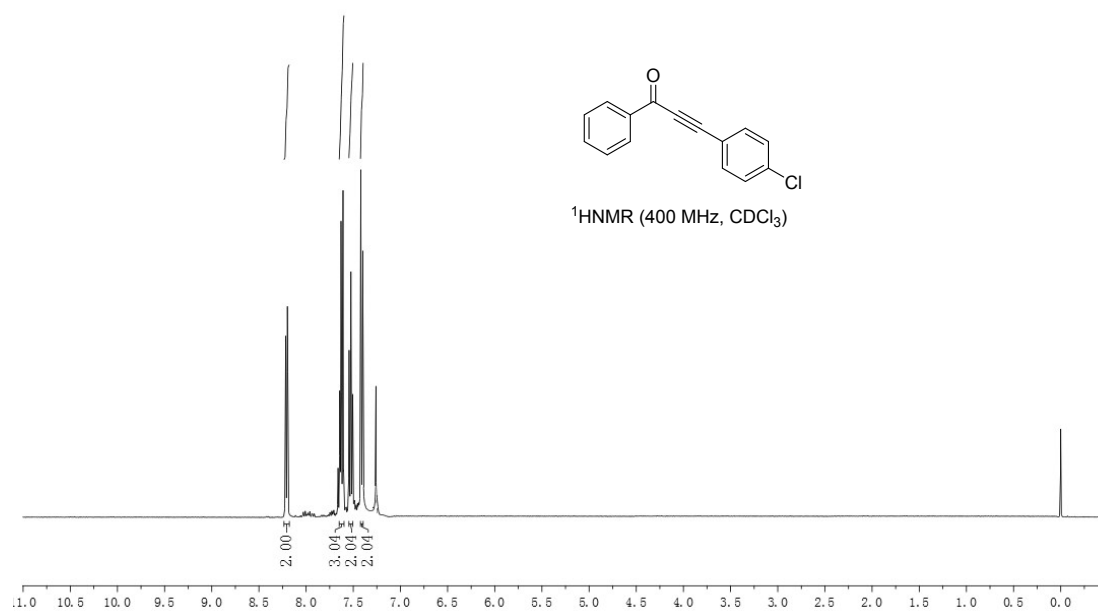

3af

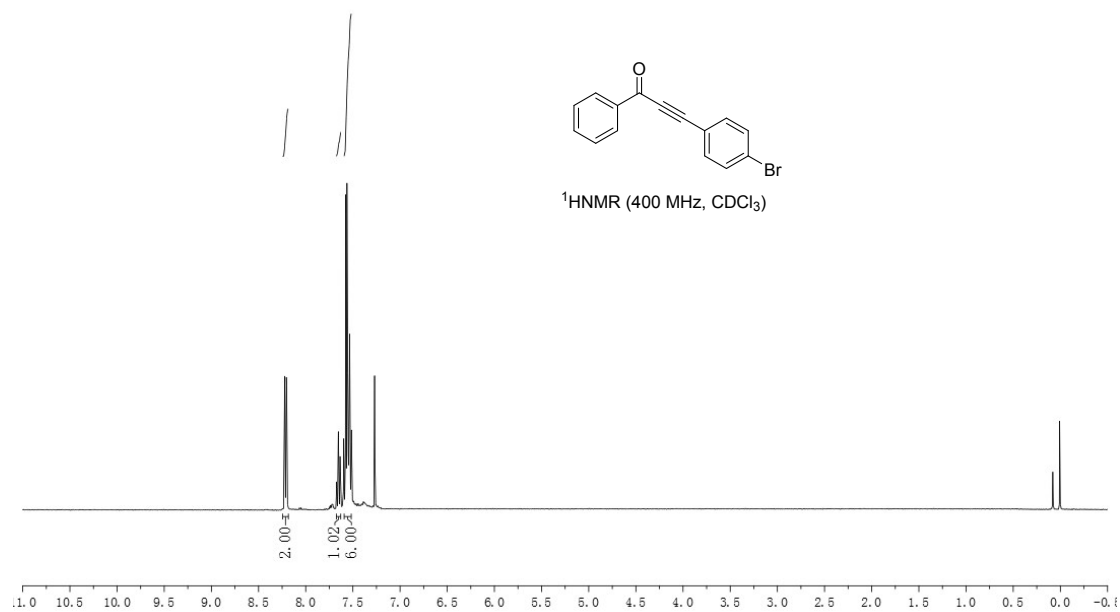

3ag

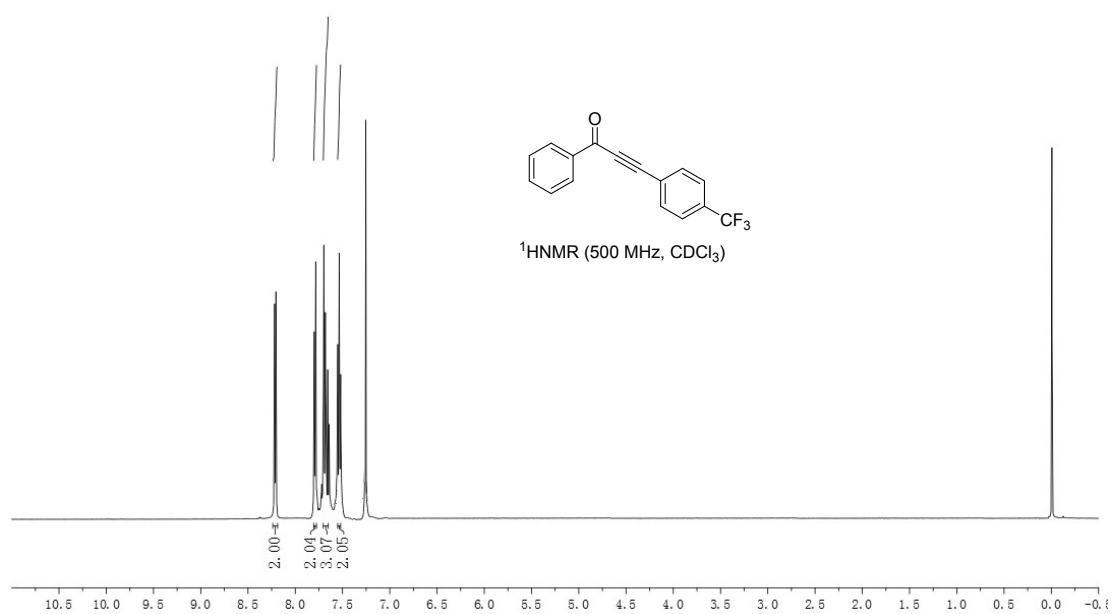

3ag

—63.13

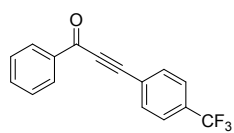

<sup>19</sup>F NMR (500 MHz, CDCl<sub>3</sub>)

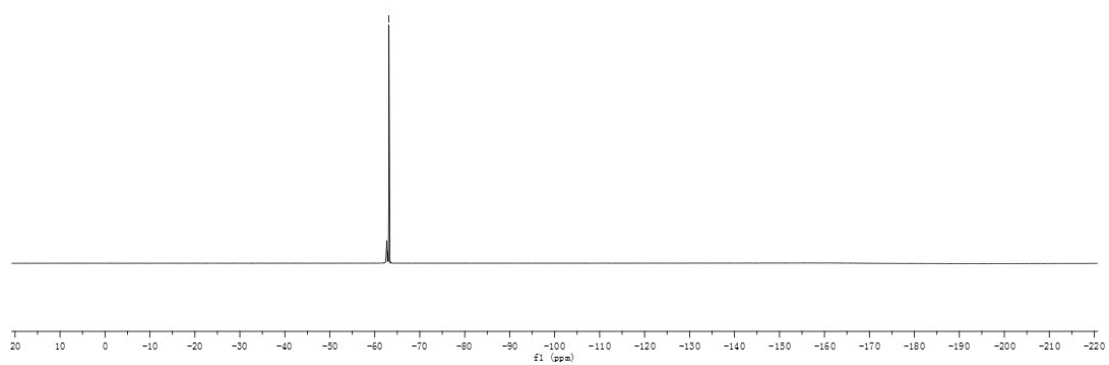

3ah

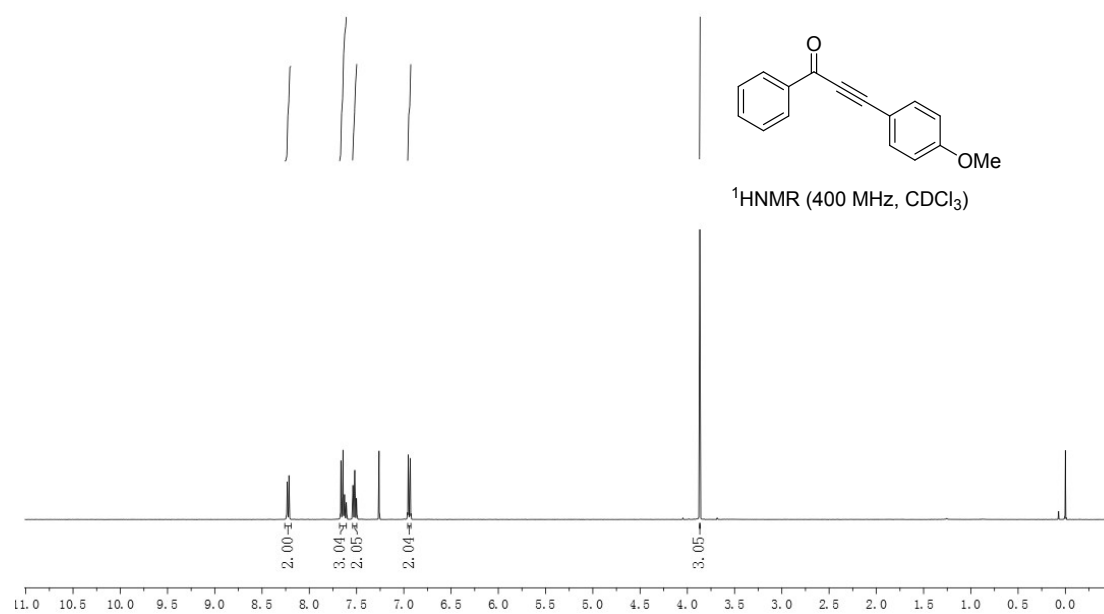

3ai

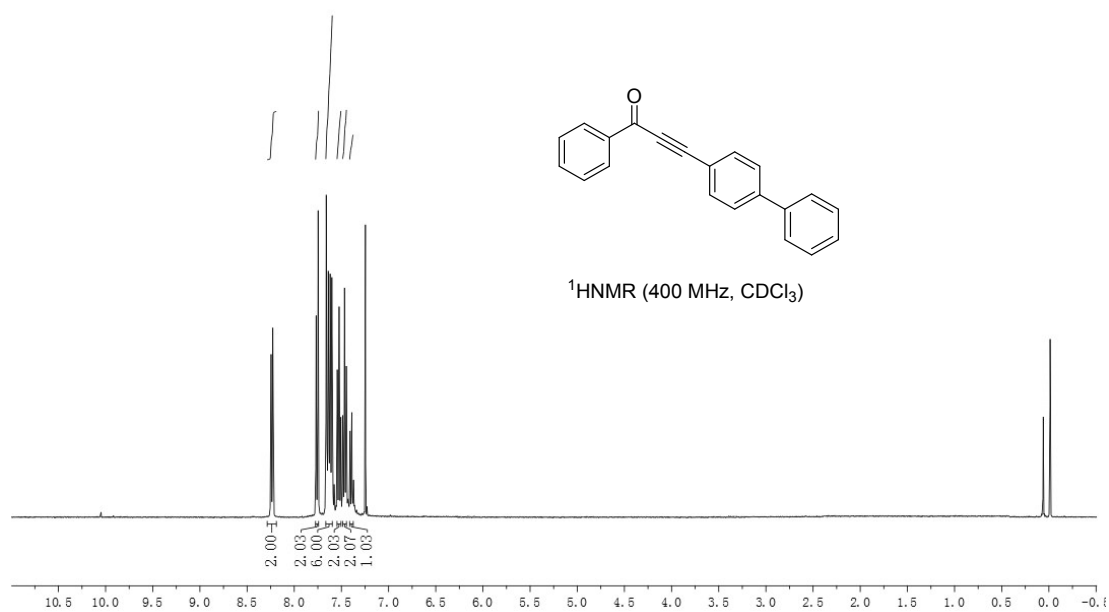

3aj

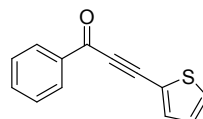

<sup>1</sup>HNMR (400 MHz, CDCl<sub>3</sub>)

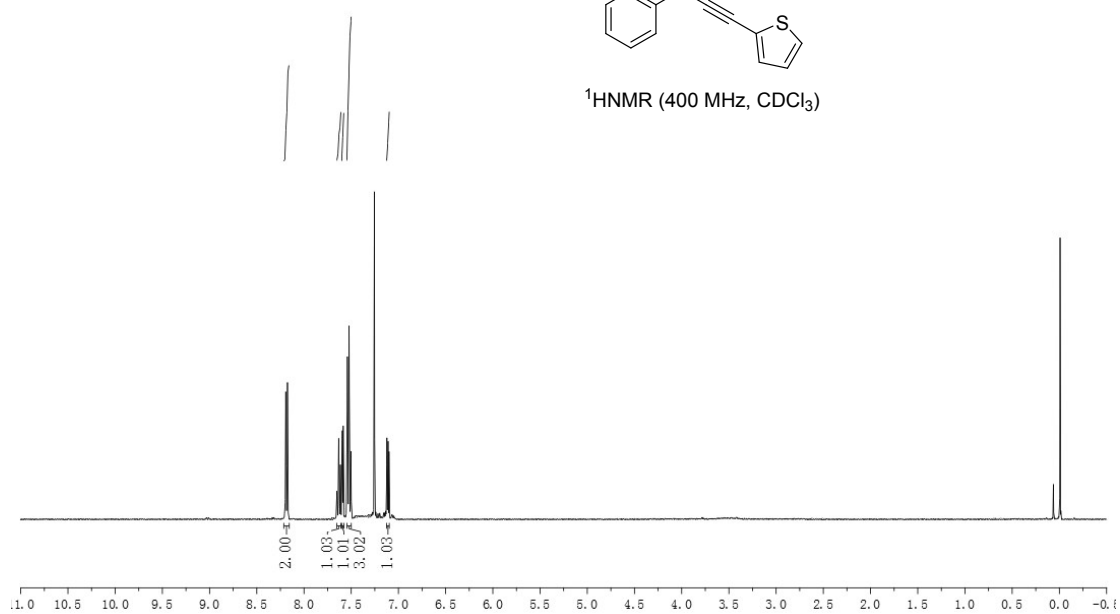

3ak

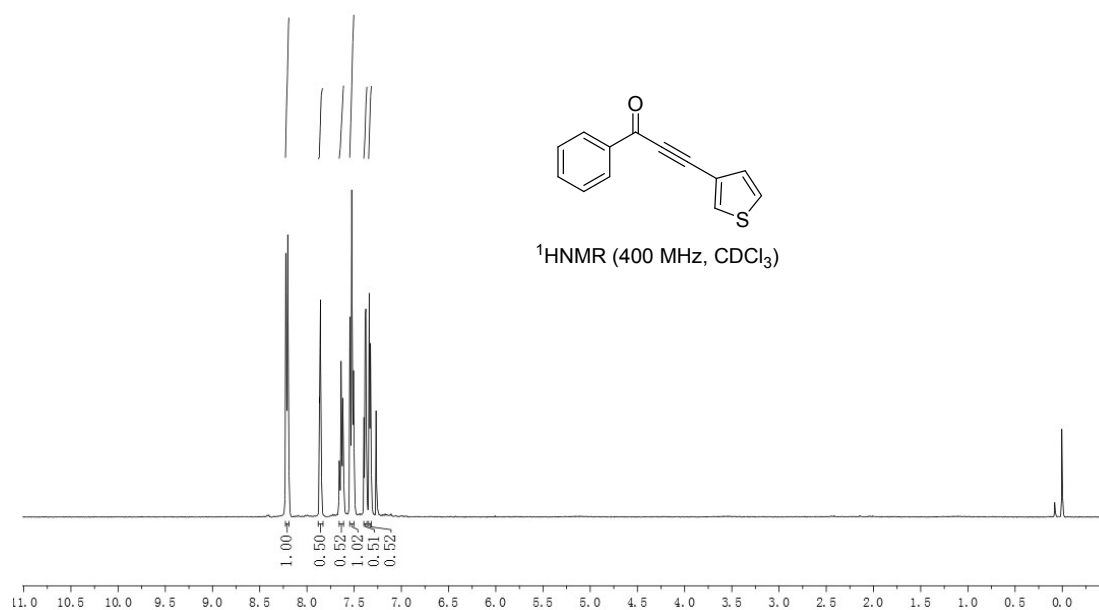

3al

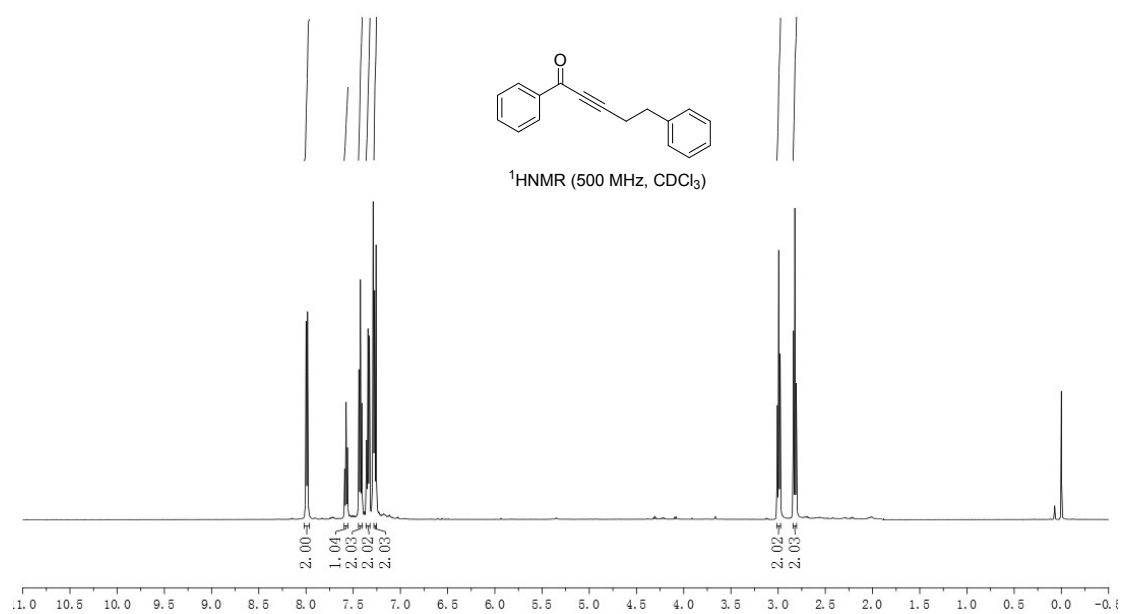

3am

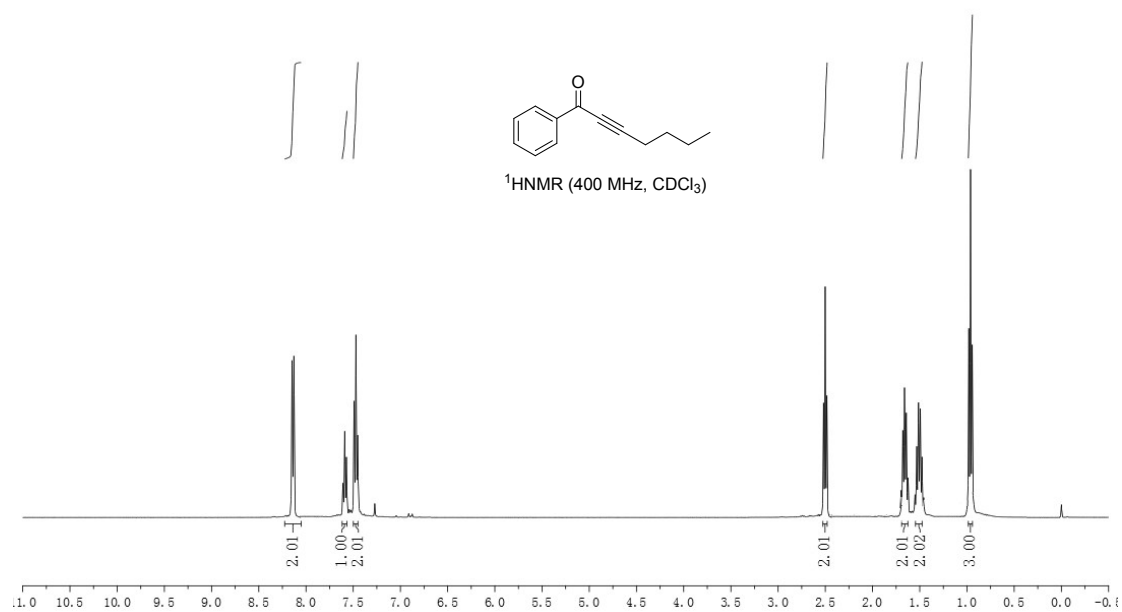

3an

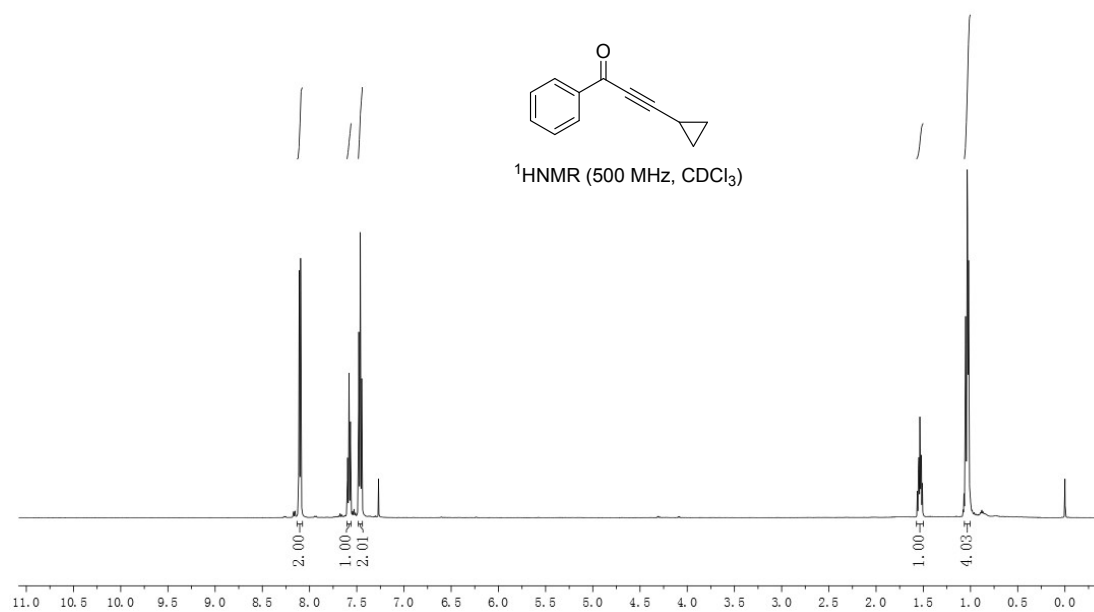

3ba

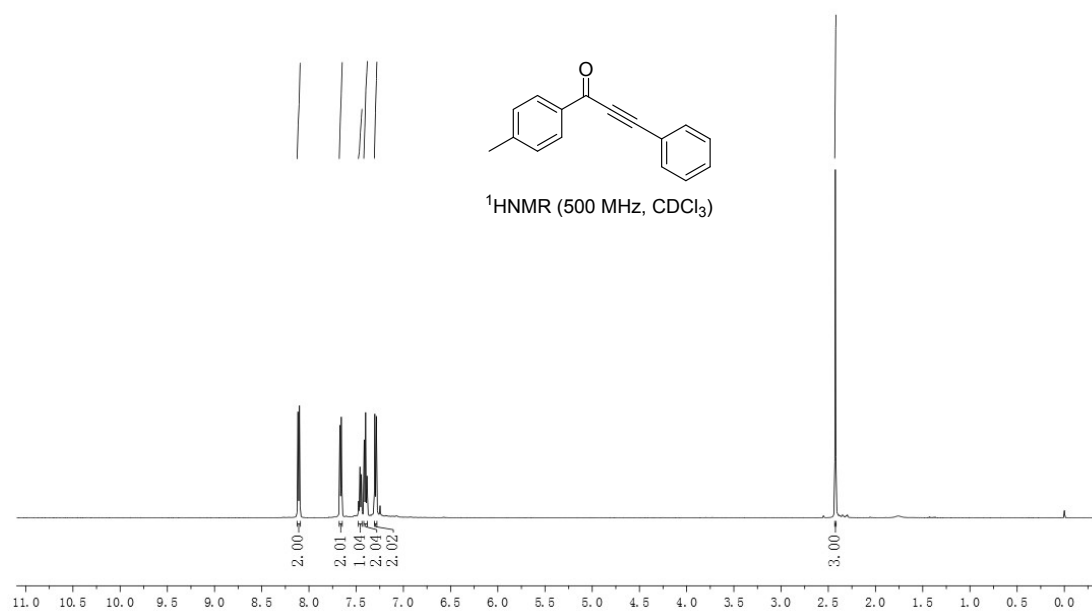

3ca

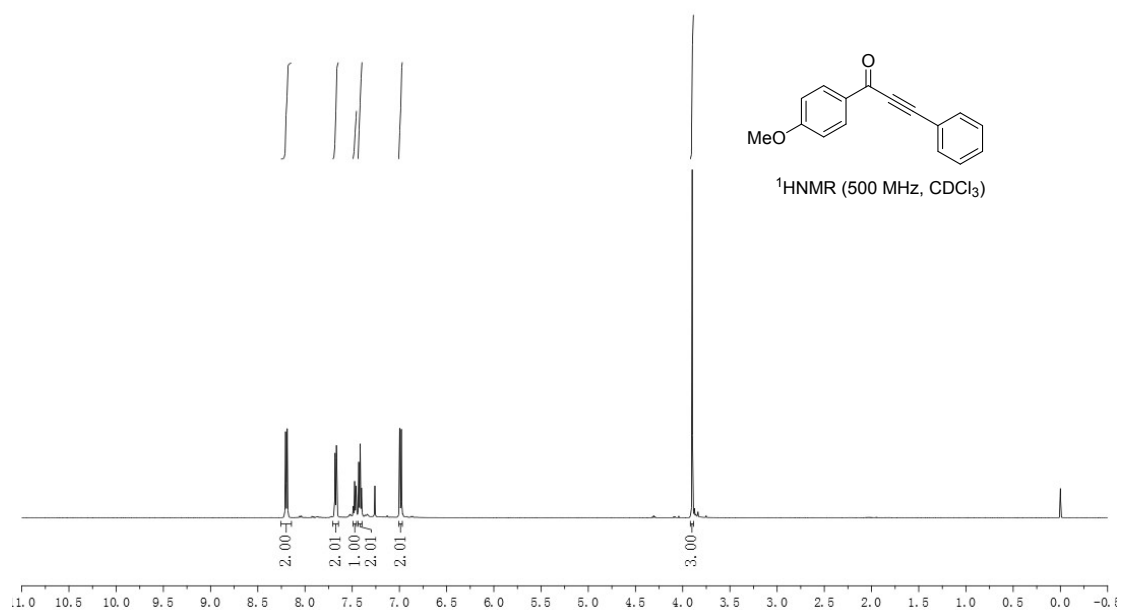

3da

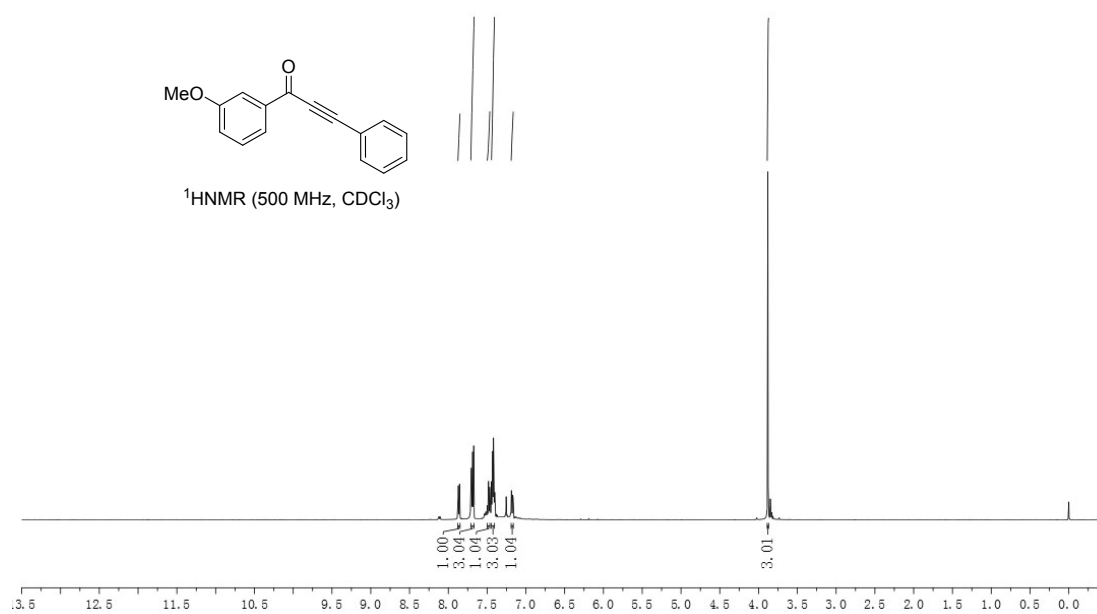

3ea

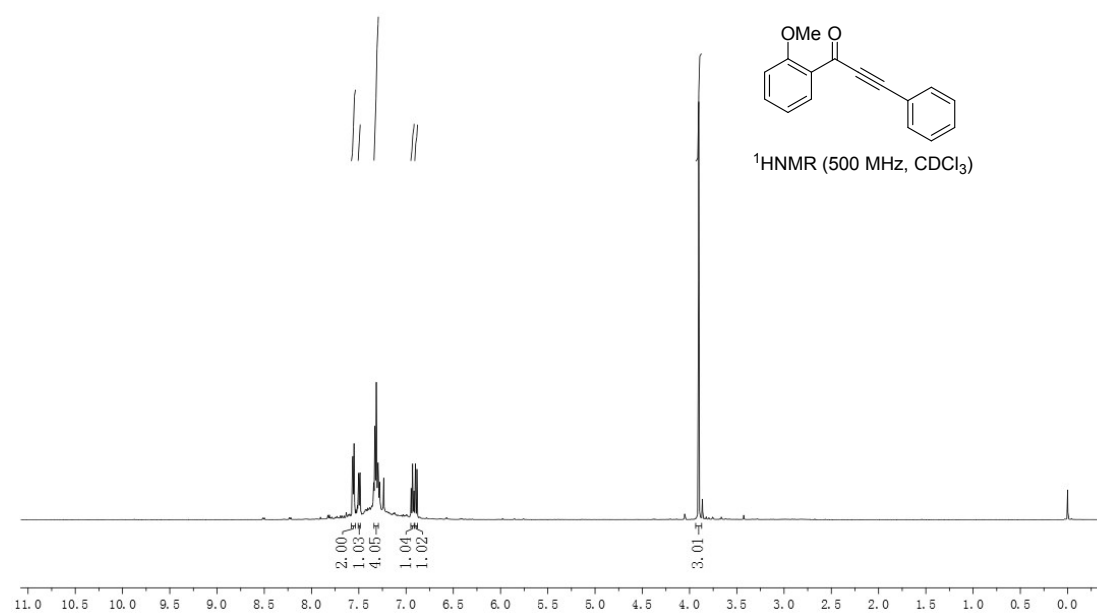

3fa

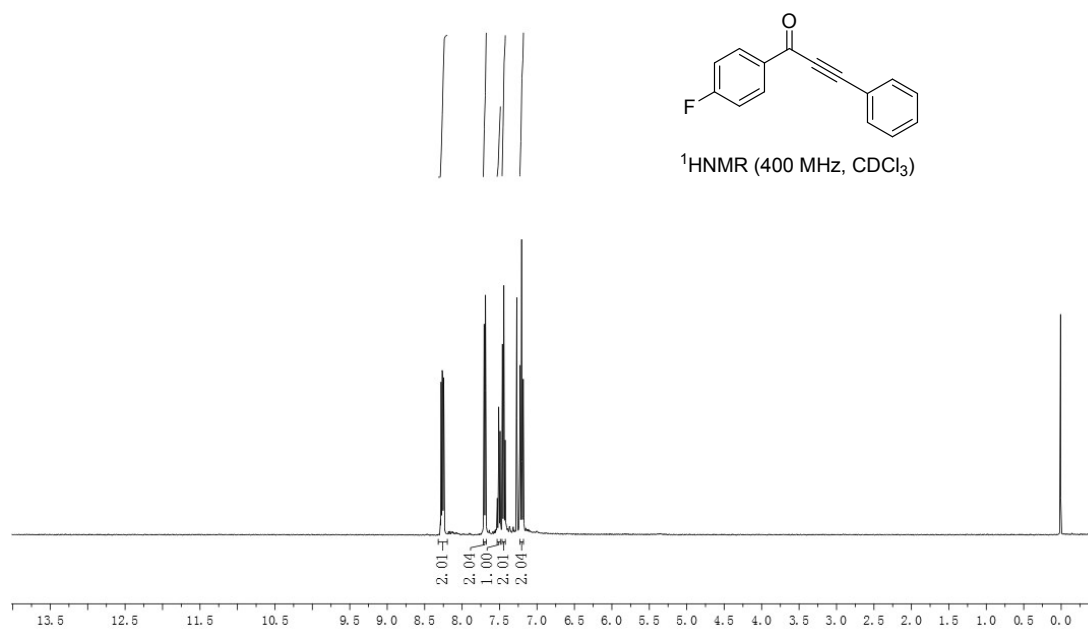

3fa

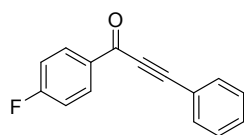

$^{19}\text{F}$  NMR (400 MHz,  $\text{CDCl}_3$ )

102.98  
102.99  
102.99  
103.00  
103.02  
103.02

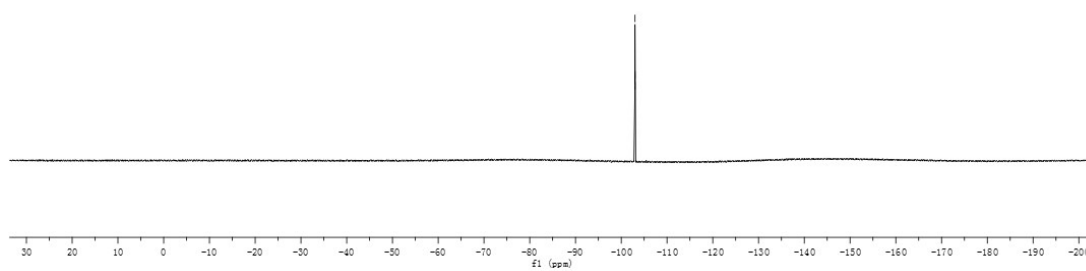

3ga

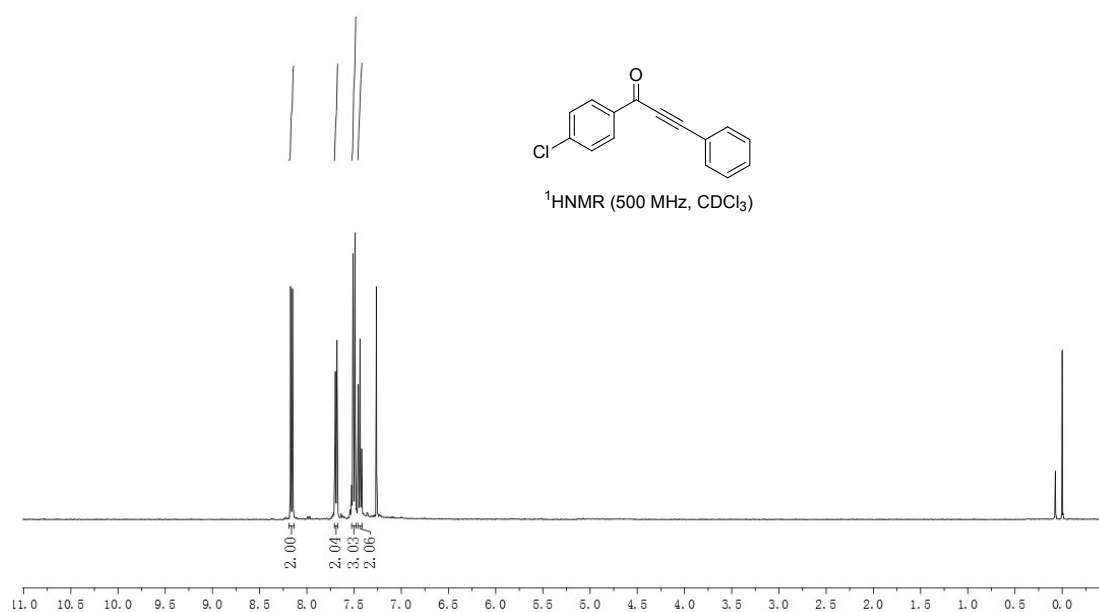

3ha

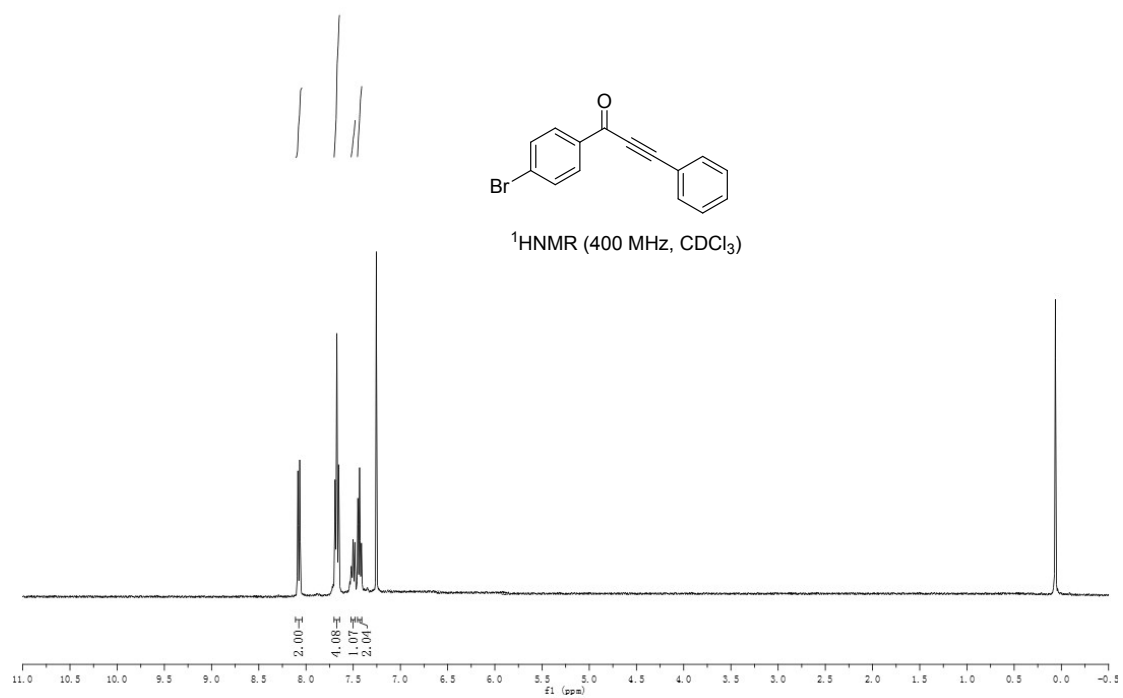

3ia

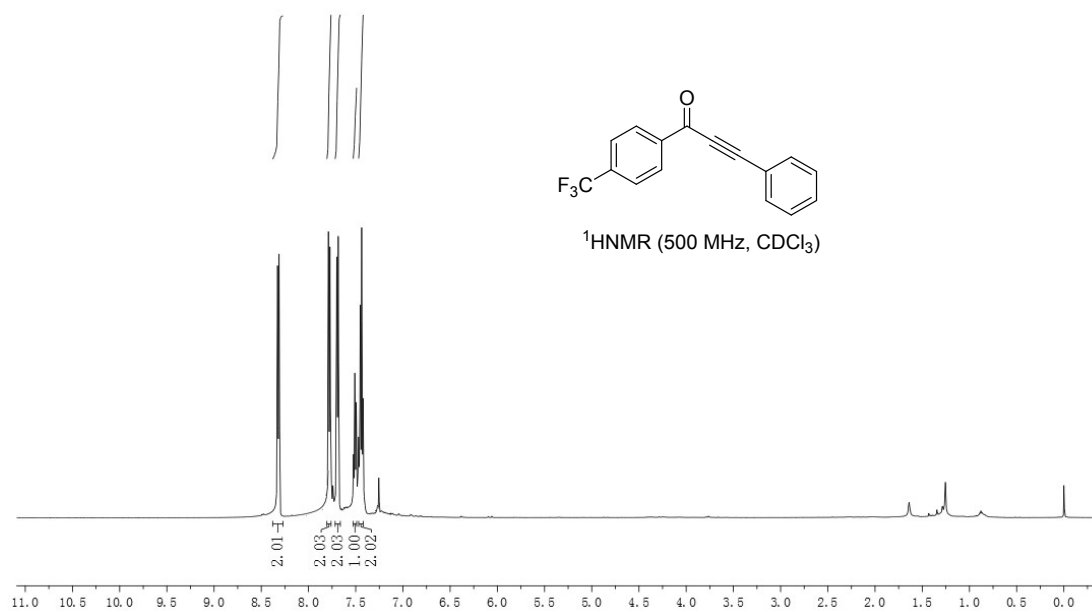

3ia

—63.11

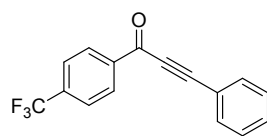

$^{19}\text{F}$ NMR (500 MHz,  $\text{CDCl}_3$ )

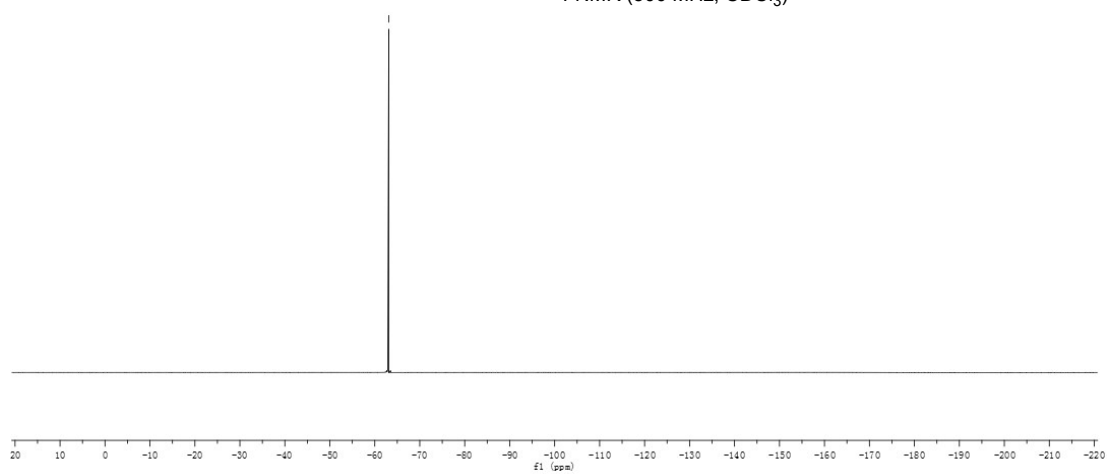

3ja

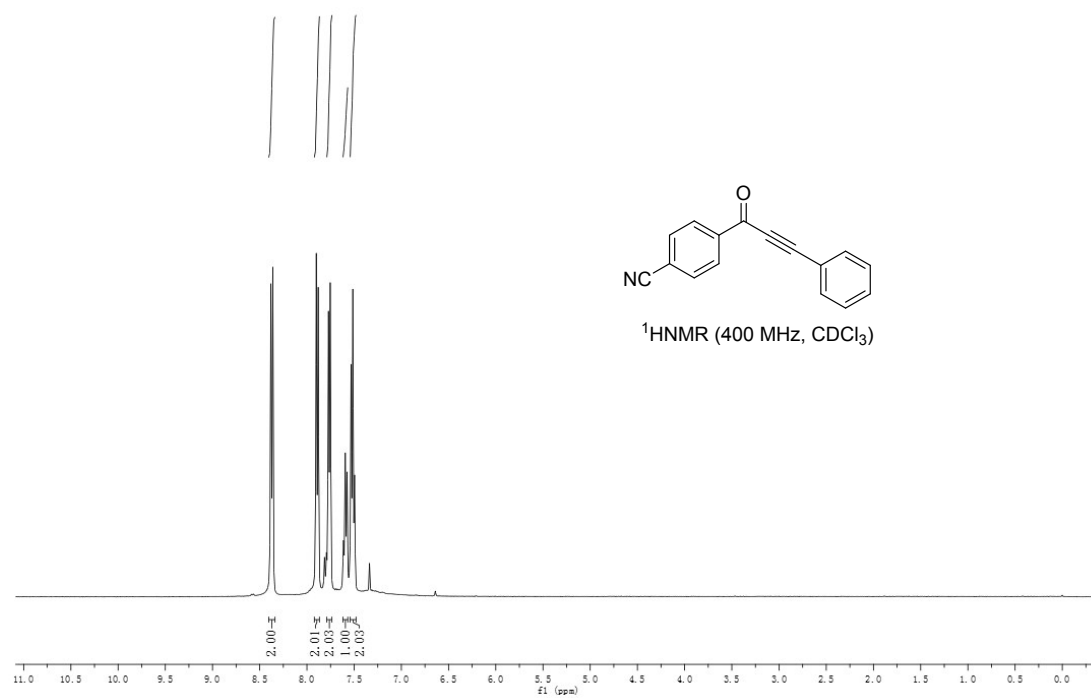

3ka

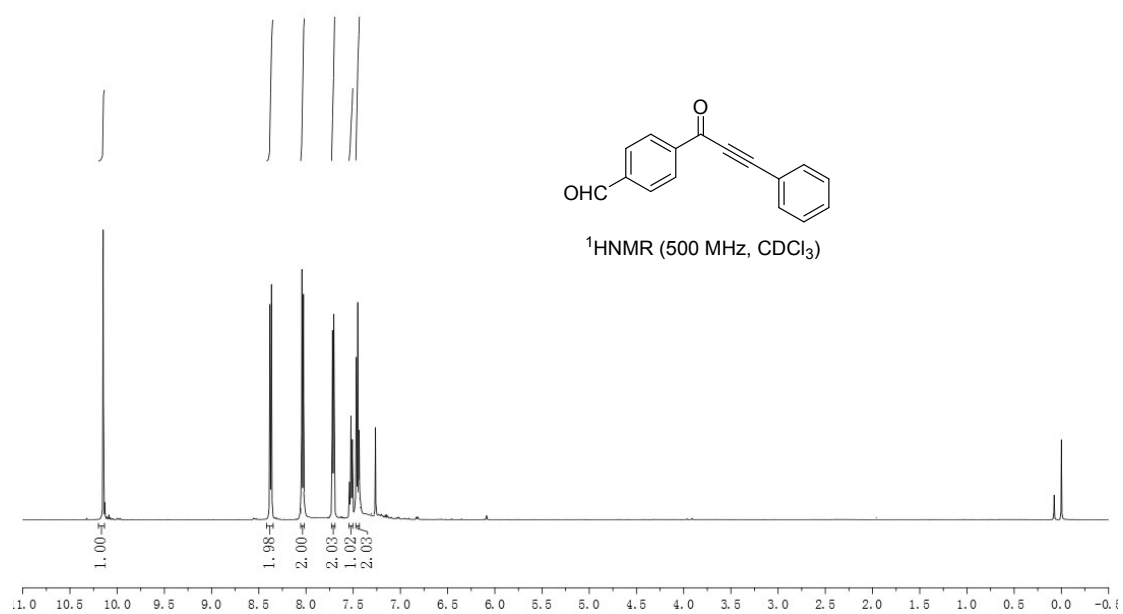

3la

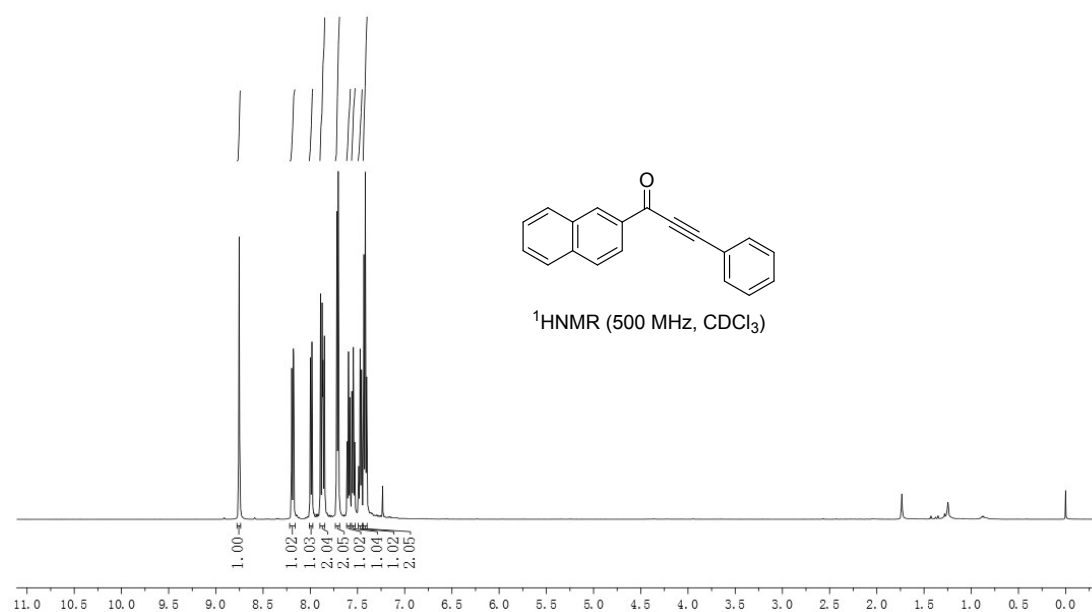

3ma

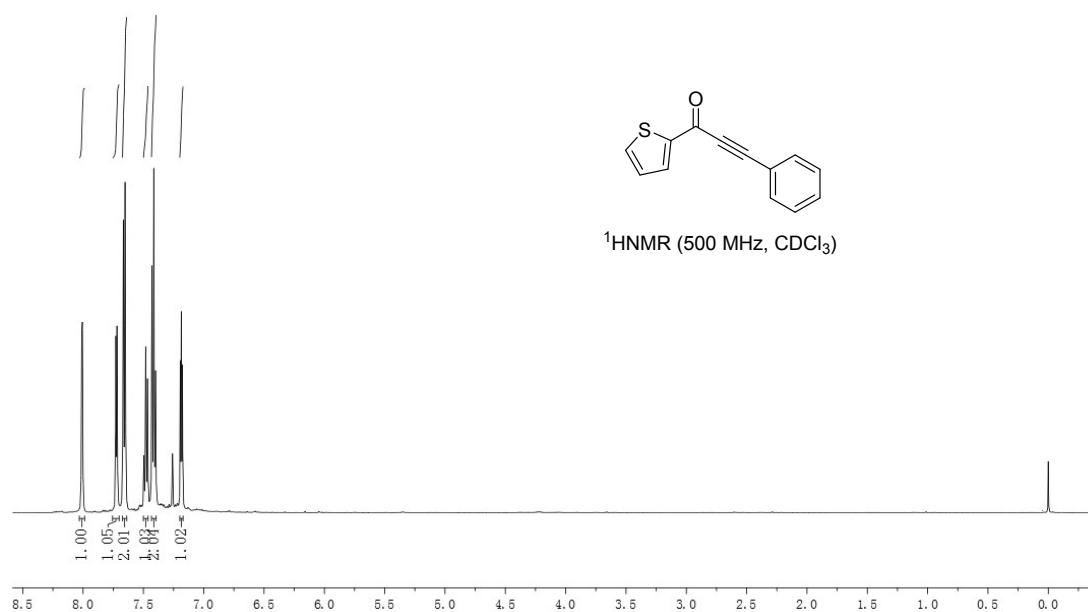

3na

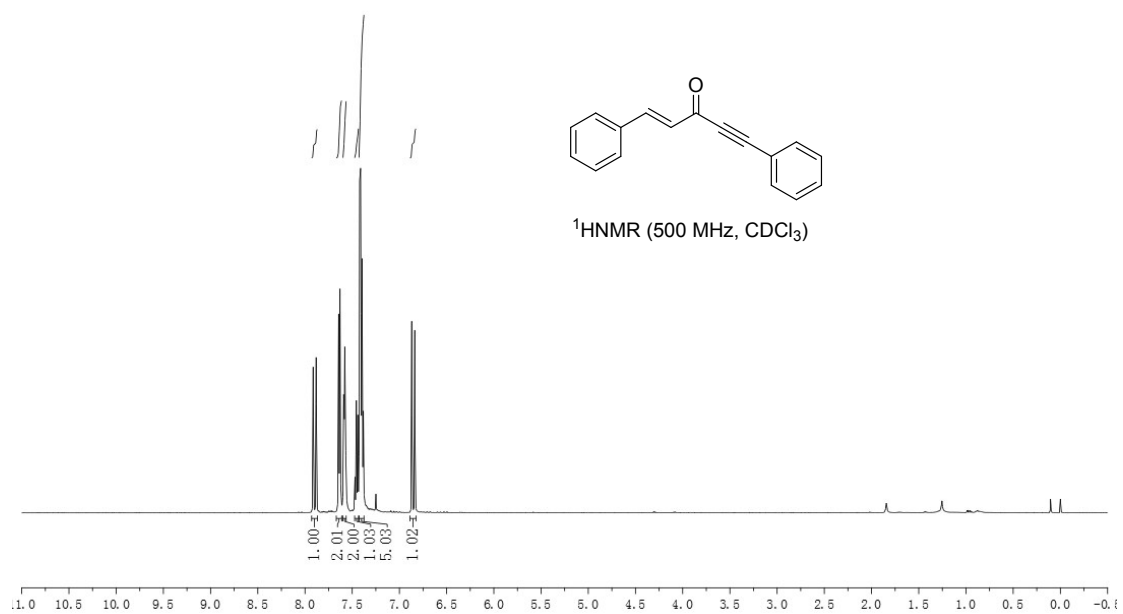

3oa

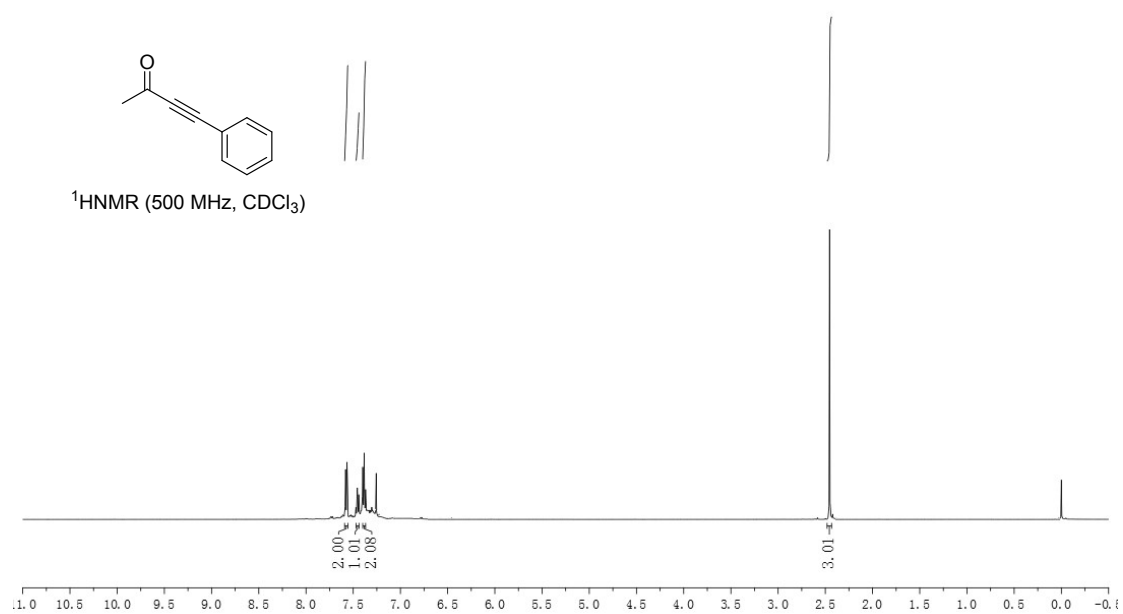

3pa

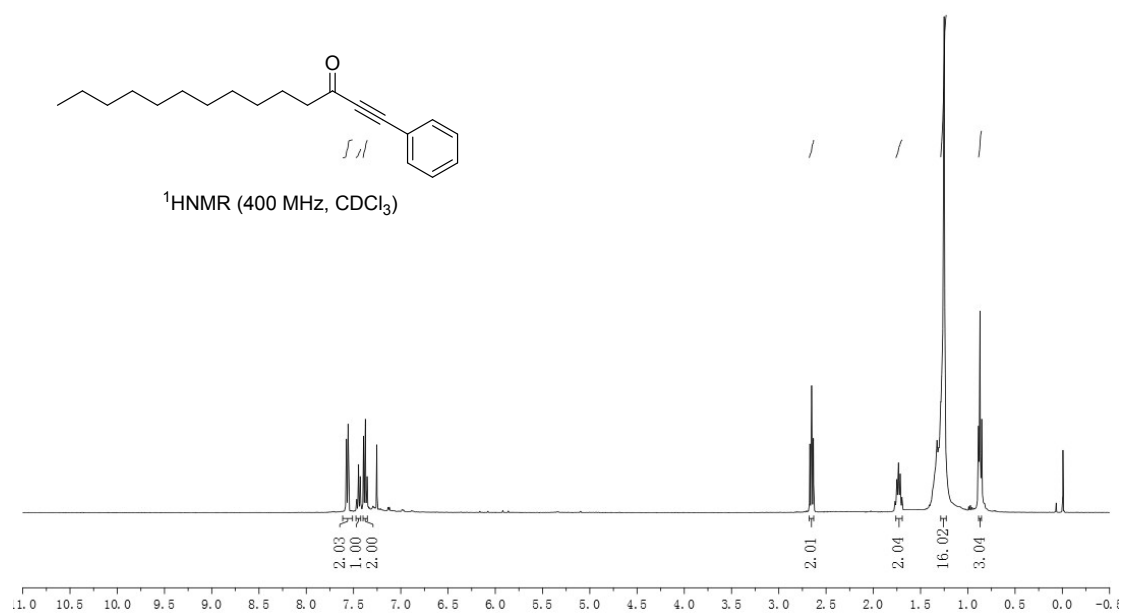

Supplement: c6cc06428k1.pdf [file c6cc06428k1.pdf]
